# Supplementary material for: On-Line Screening, Isolation and Identification of Antioxidant Compounds of Helianthemum ruficomum
Source: PubMed Central journal article supplement (PMC6155680; doi:10.3390/molecules22020239), 2017-02-08
Supplement: molecules-22-00239-s001.pdf [file molecules-22-00239-s001.pdf]

# Supplementary Materials: On-Line Screening, Isolation and Identification of Antioxidant Compounds of *Helianthemum ruficomum*

Yasmine Chemam, Samir Benayache, Eric Marchioni, Minjie Zhao, Paul Mosset and Fadila Benayache

## List of Figures

|                    |                                                                                                                          |     |
|--------------------|--------------------------------------------------------------------------------------------------------------------------|-----|
| <b>Figure S1:</b>  | ESI-HRMS(+) of Protocatechuic acid                                                                                       | S4  |
| <b>Figure S2:</b>  | <sup>1</sup> H NMR spectrum (400 MHz, CD <sub>3</sub> OD, δppm) of protocatechuic acid                                   | S5  |
| <b>Figure S3:</b>  | HSQC spectrum (400 MHz, CD <sub>3</sub> OD, δppm) of protocatechuic acid                                                 | S5  |
| <b>Figure S4:</b>  | HMBC spectrum (400 MHz, CD <sub>3</sub> OD, δppm) of protocatechuic acid                                                 | S6  |
| <b>Figure S5:</b>  | <sup>13</sup> C NMR spectrum (100 MHz, CD <sub>3</sub> OD, δppm) of protocatechuic acid                                  | S6  |
| <b>Figure S6:</b>  | ESI-HRMS(+) of <i>trans</i> -tiliroside                                                                                  | S7  |
| <b>Figure S7:</b>  | <sup>1</sup> H NMR spectrum (400 MHz, DMSO- <i>d</i> <sub>6</sub> , δppm) of <i>trans</i> -tiliroside                    | S8  |
| <b>Figure S8:</b>  | HSQC spectrum (Spreading out 1) (500 MHz, DMSO- <i>d</i> <sub>6</sub> , δppm) of <i>trans</i> -tiliroside                | S8  |
| <b>Figure S9:</b>  | HSQC spectrum (Spreading out 2) (500 MHz, DMSO- <i>d</i> <sub>6</sub> , δppm) of <i>trans</i> -tiliroside                | S9  |
| <b>Figure S10:</b> | COSY spectrum (Spreading out 1) (500 MHz, DMSO- <i>d</i> <sub>6</sub> , δppm) of <i>trans</i> -tiliroside                | S9  |
| <b>Figure S11:</b> | COSY spectrum (Spreading out 2) (500 MHz, DMSO- <i>d</i> <sub>6</sub> , δppm) of <i>trans</i> -tiliroside                | S10 |
| <b>Figure S12:</b> | HMBC spectrum (Spreading out 1) (500 MHz, DMSO- <i>d</i> <sub>6</sub> , δppm) of <i>trans</i> -tiliroside                | S10 |
| <b>Figure S13:</b> | HMBC spectrum (Spreading out 2) (500 MHz, DMSO- <i>d</i> <sub>6</sub> , δppm) of <i>trans</i> -tiliroside                | S11 |
| <b>Figure S14:</b> | HMBC spectrum (Spreading out 3) (500 MHz, DMSO- <i>d</i> <sub>6</sub> , δppm) of <i>trans</i> -tiliroside                | S11 |
| <b>Figure S15:</b> | HMBC spectrum (Spreading out 4) (500 MHz, DMSO- <i>d</i> <sub>6</sub> , δppm) of <i>trans</i> -tiliroside                | S12 |
| <b>Figure S16:</b> | HMBC spectrum (Spreading out 5) (500 MHz, DMSO- <i>d</i> <sub>6</sub> , δppm) of <i>trans</i> -tiliroside                | S12 |
| <b>Figure S17:</b> | HMBC spectrum (Spreading out 6) (500 MHz, DMSO- <i>d</i> <sub>6</sub> , δppm) of <i>trans</i> -tiliroside                | S13 |
| <b>Figure S18:</b> | <sup>1</sup> H NMR spectrum (400 MHz, DMSO- <i>d</i> <sub>6</sub> , δppm) of <i>trans</i> -tiliroside                    | S13 |
| <b>Figure S19:</b> | <sup>13</sup> C NMR spectrum (Spreading out 1) (125 MHz, DMSO- <i>d</i> <sub>6</sub> , δppm) of <i>trans</i> -tiliroside | S14 |
| <b>Figure S20:</b> | <sup>13</sup> C NMR spectrum (Spreading out 2) (125 MHz, DMSO- <i>d</i> <sub>6</sub> , δppm) of <i>trans</i> -tiliroside | S14 |
| <b>Figure S21:</b> | <sup>13</sup> C NMR spectrum (Spreading out 3) (125 MHz, DMSO- <i>d</i> <sub>6</sub> , δppm) of <i>trans</i> -tiliroside | S15 |
| <b>Figure S22:</b> | <sup>13</sup> C NMR spectrum (Spreading out 4) (125 MHz, DMSO- <i>d</i> <sub>6</sub> , δppm) of <i>trans</i> -tiliroside | S15 |
| <b>Figure S23:</b> | ESI-HRMS(+) of <i>cis</i> -tiliroside                                                                                    | S16 |
| <b>Figure S24:</b> | <sup>1</sup> H NMR spectrum (Spreading out 1) (500 MHz, CD <sub>3</sub> OD, δppm) of <i>cis</i> -tiliroside              | S16 |
| <b>Figure S25:</b> | <sup>1</sup> H NMR spectrum (Spreading out 2) (500 MHz, CD <sub>3</sub> OD, δppm) of <i>cis</i> -tiliroside              | S17 |
| <b>Figure S26:</b> | HSQC NMR spectrum (500 MHz, CD <sub>3</sub> OD, δppm) of <i>cis</i> -tiliroside                                          | S17 |
| <b>Figure S27:</b> | ESI-HRMS(+) of astragalin                                                                                                | S18 |
| <b>Figure S28:</b> | <sup>1</sup> H NMR spectrum (400 MHz, CD <sub>3</sub> OD, δppm) of astragalin                                            | S18 |
| <b>Figure S29:</b> | HSQC spectrum (400 MHz, CD <sub>3</sub> OD, δppm) of astragalin                                                          | S19 |
| <b>Figure S30:</b> | COSY spectrum (400 MHz, CD <sub>3</sub> OD, δppm) of astragalin                                                          | S19 |
| <b>Figure S31:</b> | HSQC spectrum (400 MHz, CD <sub>3</sub> OD, δppm) of astragalin                                                          | S20 |
| <b>Figure S32:</b> | HSQC spectrum (Spreading out 1) (400 MHz, CD <sub>3</sub> OD, δppm) of astragalin                                        | S20 |
| <b>Figure S33:</b> | HMBC spectrum (Spreading out 1) (400 MHz, CD <sub>3</sub> OD, δppm) of astragalin                                        | S21 |
| <b>Figure S34:</b> | <sup>13</sup> C spectrum (100 MHz, CD <sub>3</sub> OD, δppm) of astragalin                                               | S21 |
| <b>Figure S35:</b> | ESI-HRMS(+) of picein                                                                                                    | S22 |
| <b>Figure S36:</b> | <sup>1</sup> H NMR spectrum (Spreading out 1) (400 MHz, DMSO- <i>d</i> <sub>6</sub> , δppm) of picein                    | S23 |
| <b>Figure S37:</b> | HSQC NMR spectrum (400 MHz, DMSO- <i>d</i> <sub>6</sub> , δppm) of picein                                                | S23 |
| <b>Figure S38:</b> | COSY NMR spectrum (400 MHz, DMSO- <i>d</i> <sub>6</sub> , δppm) of picein                                                | S24 |
| <b>Figure S39:</b> | HSQC NMR spectrum (Spreading out 1) (400 MHz, DMSO- <i>d</i> <sub>6</sub> , δppm) of picein                              | S24 |
| <b>Figure S40:</b> | HMBC NMR spectrum (400 MHz, DMSO- <i>d</i> <sub>6</sub> , δppm) of picein                                                | S25 |
| <b>Figure S41:</b> | HSQC NMR spectrum (Spreading out 2) (400 MHz, DMSO- <i>d</i> <sub>6</sub> , δppm) of picein                              | S25 |
| <b>Figure S42:</b> | <sup>13</sup> C NMR spectrum (Spreading out 1) (100 MHz, DMSO- <i>d</i> <sub>6</sub> , δppm) of picein                   | S26 |
| <b>Figure S43:</b> | ESI-HRMS(+) of Vanillic acid 4-O-β-D-glucopyranoside                                                                     | S26 |
| <b>Figure S44:</b> | <sup>1</sup> H NMR spectrum (400 MHz, CD <sub>3</sub> OD, δppm) of Vanillic acid 4-O-β-D-glucopyranoside                 | S27 |

|                    |                                                                                                                          |     |
|--------------------|--------------------------------------------------------------------------------------------------------------------------|-----|
| <b>Figure S45:</b> | HSQC NMR spectrum (400 MHz, CD <sub>3</sub> OD, δppm) of Vanillic acid 4-O-β-D-glucopyranoside                           | S27 |
| <b>Figure S46:</b> | COSY NMR spectrum (Spreading out 1) (400 MHz, CD <sub>3</sub> OD, δppm) of Vanillic acid 4-O-β-D-glucopyranoside         | S28 |
| <b>Figure S47:</b> | HSQC NMR spectrum (Spreading out 1) (400 MHz, CD <sub>3</sub> OD, δppm) of Vanillic acid 4-O-β-D-glucopyranoside         | S28 |
| <b>Figure S48:</b> | HMBC NMR spectrum (Spreading out 1) (400 MHz, CD <sub>3</sub> OD, δppm) of Vanillic acid 4-O-β-D-glucopyranoside         | S29 |
| <b>Figure S49:</b> | HSQC NMR spectrum (Spreading out 2) (400 MHz, CD <sub>3</sub> OD, δppm) of Vanillic acid 4-O-β-D-glucopyranoside         | S29 |
| <b>Figure S50:</b> | <sup>13</sup> C NMR spectrum (100 MHz, CD <sub>3</sub> OD, δppm) of Vanillic acid 4-O-β-D-glucopyranoside                | S30 |
| <b>Figure S51:</b> | ESI-HRMS(+) of Lavandoside                                                                                               | S30 |
| <b>Figure S52:</b> | <sup>1</sup> H NMR spectrum (400 MHz, CD <sub>3</sub> OD, δppm) of Lavandoside                                           | S31 |
| <b>Figure S53:</b> | <sup>1</sup> H NMR spectrum (Spreading out 1) (400 MHz, CD <sub>3</sub> OD, δppm) of Lavandoside                         | S31 |
| <b>Figure S54:</b> | HSQC NMR spectrum (400 MHz, CD <sub>3</sub> OD, δppm) of Lavandoside                                                     | S32 |
| <b>Figure S55:</b> | COSY NMR spectrum (400 MHz, CD <sub>3</sub> OD, δppm) of Lavandoside                                                     | S32 |
| <b>Figure S56:</b> | HSQC NMR spectrum (Spreading out 1) (400 MHz, CD <sub>3</sub> OD, δppm) of Lavandoside                                   | S33 |
| <b>Figure S57:</b> | HMBC NMR spectrum (Spreading out 1) (400 MHz, CD <sub>3</sub> OD, δppm) of Lavandoside                                   | S33 |
| <b>Figure S58:</b> | HMBC NMR spectrum (Spreading out 2) (400 MHz, CD <sub>3</sub> OD, δppm) of Lavandoside                                   | S34 |
| <b>Figure S59:</b> | HMBC NMR spectrum (Spreading out 3) (400 MHz, CD <sub>3</sub> OD, δppm) of Lavandoside                                   | S34 |
| <b>Figure S60:</b> | HSQC NMR spectrum (Spreading out 2) (400 MHz, CD <sub>3</sub> OD, δppm) of Lavandoside                                   | S35 |
| <b>Figure S61:</b> | <sup>13</sup> C NMR spectrum (100 MHz, CD <sub>3</sub> OD, δppm) of Lavandoside                                          | S36 |
| <b>Figure S62:</b> | ESI-HRMS (-) of 4-Hydroxybenzoic acid 4-O-β-D-glucopyranoside                                                            | S36 |
| <b>Figure S63:</b> | <sup>1</sup> H NMR spectrum (500 MHz, CD <sub>3</sub> OD, δppm) of 4-Hydroxybenzoic acid 4-O-β-D-glucopyranoside         | S37 |
| <b>Figure S64:</b> | HSQC NMR spectrum (500 MHz, CD <sub>3</sub> OD, δppm) of 4-Hydroxybenzoic acid 4-O-β-D-glucopyranoside                   | S37 |
| <b>Figure S65:</b> | COSY NMR spectrum (Spreading out 1) (500 MHz, CD <sub>3</sub> OD, δppm) of 4-Hydroxybenzoic acid 4-O-β-D-glucopyranoside | S38 |
| <b>Figure S66:</b> | HSQC NMR spectrum (Spreading out 1) (500 MHz, CD <sub>3</sub> OD, δppm) of 4-Hydroxybenzoic acid 4-O-β-D-glucopyranoside | S38 |
| <b>Figure S67:</b> | HMBC NMR spectrum (Spreading out 1) (500 MHz, CD <sub>3</sub> OD, δppm) of 4-Hydroxybenzoic acid 4-O-β-D-glucopyranoside | S39 |
| <b>Figure S68:</b> | HSQC NMR spectrum (Spreading out 2) (500 MHz, CD <sub>3</sub> OD, δppm) of 4-Hydroxybenzoic acid 4-O-β-D-glucopyranoside | S39 |
| <b>Figure S69:</b> | HSQC NMR spectrum (125 MHz, CD <sub>3</sub> OD, δppm) of 4-Hydroxybenzoic acid 4-O-β-D-glucopyranoside                   | S40 |
| <b>Figure S70:</b> | ESI-HRMS(+) of Nicotiflorin                                                                                              | S40 |
| <b>Figure S71:</b> | <sup>1</sup> H NMR spectrum (400 MHz, DMSO- <i>d</i> <sub>6</sub> , δppm) of Nicotiflorin                                | S41 |
| <b>Figure S72:</b> | HSQC NMR spectrum (Spreading out 1) (400 MHz, DMSO- <i>d</i> <sub>6</sub> , δppm) of Nicotiflorin                        | S41 |
| <b>Figure S73:</b> | COSY NMR spectrum (Spreading out 1) (400 MHz, DMSO- <i>d</i> <sub>6</sub> , δppm) of Nicotiflorin                        | S42 |
| <b>Figure S74:</b> | HSQC NMR spectrum (Spreading out 2) (400 MHz, DMSO- <i>d</i> <sub>6</sub> , δppm) of Nicotiflorin                        | S42 |
| <b>Figure S75:</b> | HSQC NMR spectrum (Spreading out 3) (400 MHz, DMSO- <i>d</i> <sub>6</sub> , δppm) of Nicotiflorin                        | S43 |
| <b>Figure S76:</b> | COSY NMR spectrum (Spreading out 2) (400 MHz, DMSO- <i>d</i> <sub>6</sub> , δppm) of Nicotiflorin                        | S43 |
| <b>Figure S77:</b> | HSQC NMR spectrum (Spreading out 4) (400 MHz, DMSO- <i>d</i> <sub>6</sub> , δppm) of Nicotiflorin                        | S44 |
| <b>Figure S78:</b> | HMBC NMR spectrum (400 MHz, DMSO- <i>d</i> <sub>6</sub> , δppm) of Nicotiflorin                                          | S44 |
| <b>Figure S79:</b> | HSQC NMR spectrum (Spreading out 5) (400 MHz, DMSO- <i>d</i> <sub>6</sub> , δppm) of Nicotiflorin                        | S45 |
| <b>Figure S80:</b> | <sup>13</sup> C NMR spectrum (Spreading out 1) (100 MHz, DMSO- <i>d</i> <sub>6</sub> , δppm) of Nicotiflorin             | S45 |
| <b>Figure S81:</b> | <sup>13</sup> C NMR spectrum (100 MHz, DMSO- <i>d</i> <sub>6</sub> , δppm) of Nicotiflorin                               | S46 |
| <b>Figure S82:</b> | ESI-HRMS(+) of rutin                                                                                                     | S46 |
| <b>Figure S83:</b> | <sup>1</sup> H NMR spectrum (400 MHz, CD <sub>3</sub> OD, δppm) of rutin                                                 | S47 |
| <b>Figure S84:</b> | HSQC NMR spectrum (Spreading out 1) (400 MHz, CD <sub>3</sub> OD, δppm) of rutin                                         | S47 |
| <b>Figure S85:</b> | COSY NMR spectrum (Spreading out 1) (400 MHz, CD <sub>3</sub> OD, δppm) of rutin                                         | S48 |
| <b>Figure S86:</b> | HSQC NMR spectrum (Spreading out 2) (400 MHz, CD <sub>3</sub> OD, δppm) of rutin                                         | S48 |
| <b>Figure S87:</b> | HSQC NMR spectrum (Spreading out 3) (400 MHz, CD <sub>3</sub> OD, δppm) of rutin                                         | S49 |
| <b>Figure S88:</b> | COSY NMR spectrum (Spreading out 2) (400 MHz, CD <sub>3</sub> OD, δppm) of rutin                                         | S49 |
| <b>Figure S89:</b> | HMBC NMR spectrum (Spreading out 1) (400 MHz, CD <sub>3</sub> OD, δppm) of rutin                                         | S50 |
| <b>Figure S90:</b> | HMBC NMR spectrum (Spreading out 2) (400 MHz, CD <sub>3</sub> OD, δppm) of rutin                                         | S50 |
| <b>Figure S91:</b> | HMBC NMR spectrum (Spreading out 4) (400 MHz, CD <sub>3</sub> OD, δppm) of rutin                                         | S51 |
| <b>Figure S92:</b> | <sup>13</sup> C NMR spectrum (100 MHz, CD <sub>3</sub> OD, δppm) of rutin                                                | S51 |
| <b>Figure S93:</b> | ESI-HRMS(+) of vicenin-2                                                                                                 | S52 |
| <b>Figure S94:</b> | <sup>1</sup> H NMR spectrum (400 MHz, DMSO- <i>d</i> <sub>6</sub> , δppm) of vicenin-2                                   | S52 |
| <b>Figure S95:</b> | HSQC NMR spectrum (Spreading out 1) (400 MHz, DMSO- <i>d</i> <sub>6</sub> , δppm) of vicenin-2                           | S53 |
| <b>Figure S96:</b> | COSY NMR spectrum (Spreading out 1) (400 MHz, DMSO- <i>d</i> <sub>6</sub> , δppm) of vicenin-2                           | S53 |
| <b>Figure S97:</b> | HSQC NMR spectrum (Spreading out 2) (400 MHz, DMSO- <i>d</i> <sub>6</sub> , δppm) of vicenin-2                           | S54 |
| <b>Figure S98:</b> | COSY NMR spectrum (Spreading out 2) (400 MHz, DMSO- <i>d</i> <sub>6</sub> , δppm) of vicenin-2                           | S54 |

|                     |                                                                                                 |     |
|---------------------|-------------------------------------------------------------------------------------------------|-----|
| <b>Figure S99:</b>  | <sup>13</sup> C NMR DEPT spectrum (100 MHz, DMSO- <i>d</i> <sub>6</sub> , δppm) of vicenin-2    | S55 |
| <b>Figure S100:</b> | <sup>13</sup> C NMR spectrum (100 MHz, DMSO- <i>d</i> <sub>6</sub> , δppm) of vicenin-2         | S55 |
| <b>Figure S101:</b> | HSQC NMR spectrum (Spreading out 3) (400 MHz, DMSO- <i>d</i> <sub>6</sub> , δppm) of vicenin-2  | S56 |
| <b>Figure S102:</b> | HMBC NMR spectrum (Spreading out 1) (400 MHz, DMSO- <i>d</i> <sub>6</sub> , δppm) of vicenin-2  | S56 |
| <b>Figure S103:</b> | HSQC NMR spectrum (Spreading out 4) (400 MHz, DMSO- <i>d</i> <sub>6</sub> , δppm) of vicenin-2  | S57 |
| <b>Figure S104:</b> | ESI-HRMS(+) of narcissin                                                                        | S58 |
| <b>Figure S105:</b> | <sup>1</sup> H NMR spectrum (400 MHz, CD <sub>3</sub> OD, δppm) of narcissin                    | S58 |
| <b>Figure S106:</b> | HSQC NMR spectrum (Spreading out 1) (400 MHz, CD <sub>3</sub> OD, δppm) of narcissin            | S59 |
| <b>Figure S107:</b> | COSY NMR spectrum (Spreading out 1) (400 MHz, CD <sub>3</sub> OD, δppm) of narcissin            | S59 |
| <b>Figure S108:</b> | <sup>13</sup> C NMR spectrum (Spreading out 1) (100 MHz, CD <sub>3</sub> OD, δppm) of narcissin | S60 |
| <b>Figure S109:</b> | HSQC NMR spectrum (Spreading out 2) (400 MHz, CD <sub>3</sub> OD, δppm) of narcissin            | S60 |
| <b>Figure S110:</b> | HSQC NMR spectrum (Spreading out 3) (400 MHz, CD <sub>3</sub> OD, δppm) of narcissin            | S61 |
| <b>Figure S111:</b> | COSY NMR spectrum (Spreading out 2) (400 MHz, CD <sub>3</sub> OD, δppm) of narcissin            | S61 |
| <b>Figure S112:</b> | <sup>13</sup> C NMR spectrum (Spreading out 2) (100 MHz, CD <sub>3</sub> OD, δppm) of narcissin | S62 |
| <b>Figure S113:</b> | HSQC NMR spectrum (Spreading out 4) (400 MHz, CD <sub>3</sub> OD, δppm) of narcissin            | S62 |
| <b>Figure S114:</b> | HMBC NMR spectrum (Spreading out 1) (400 MHz, CD <sub>3</sub> OD, δppm) of narcissin            | S63 |
| <b>Figure S115:</b> | HSQC NMR spectrum (Spreading out 5) (400 MHz, CD <sub>3</sub> OD, δppm) of narcissin            | S63 |
| <b>Figure S116:</b> | <sup>13</sup> C NMR spectrum (Spreading out 3) (100 MHz, CD <sub>3</sub> OD, δppm) of narcissin | S64 |
| <b>Figure S117:</b> | <sup>13</sup> C NMR spectrum (Spreading out 4) (100 MHz, CD <sub>3</sub> OD, δppm) of narcissin | S64 |

**Molecule 1:** Protocatechuic acid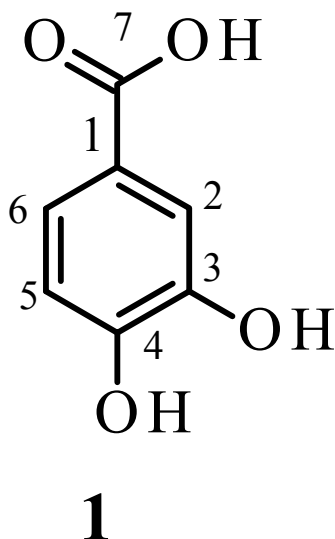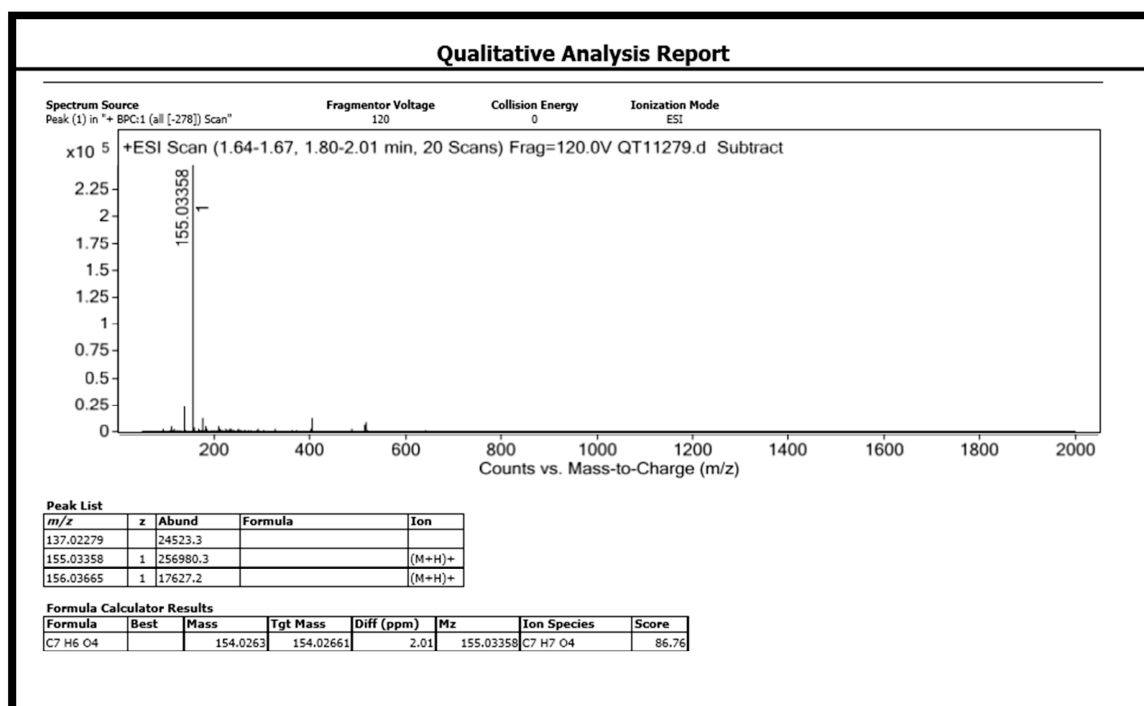**Figure S1.** ESI-HRMS(+) of Protocatechuic acid.

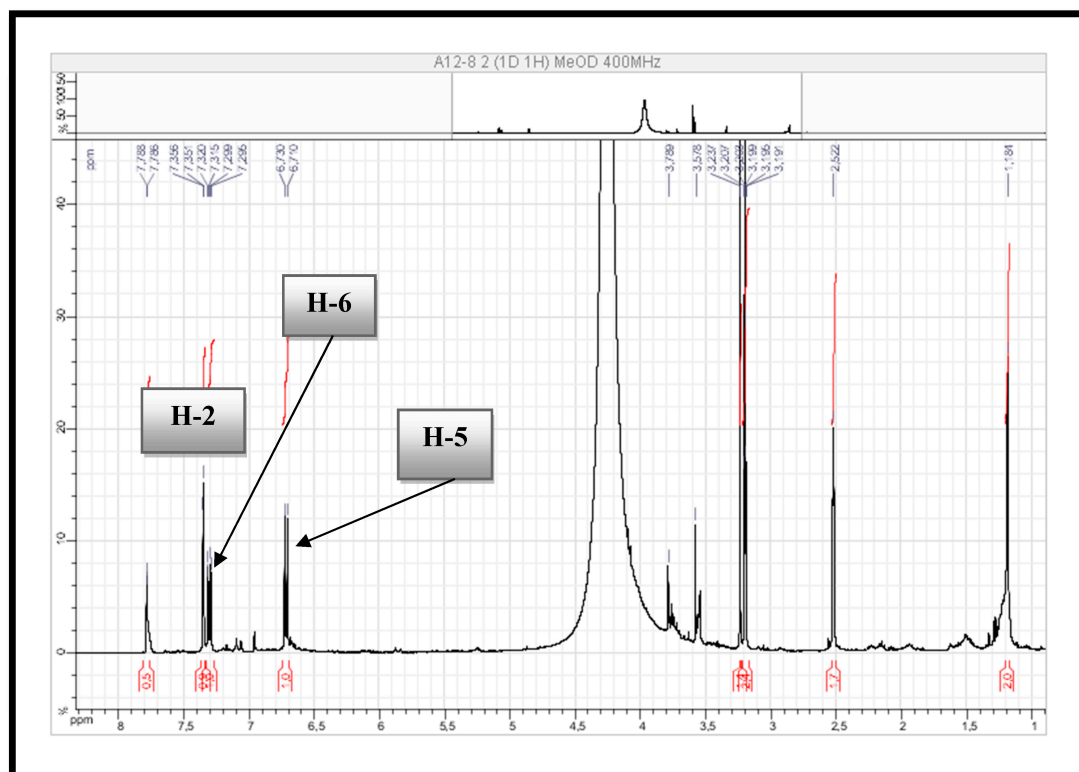

Figure S2. <sup>1</sup>H NMR spectrum (400 MHz, CD<sub>3</sub>OD, δppm) of protocatechuic acid.

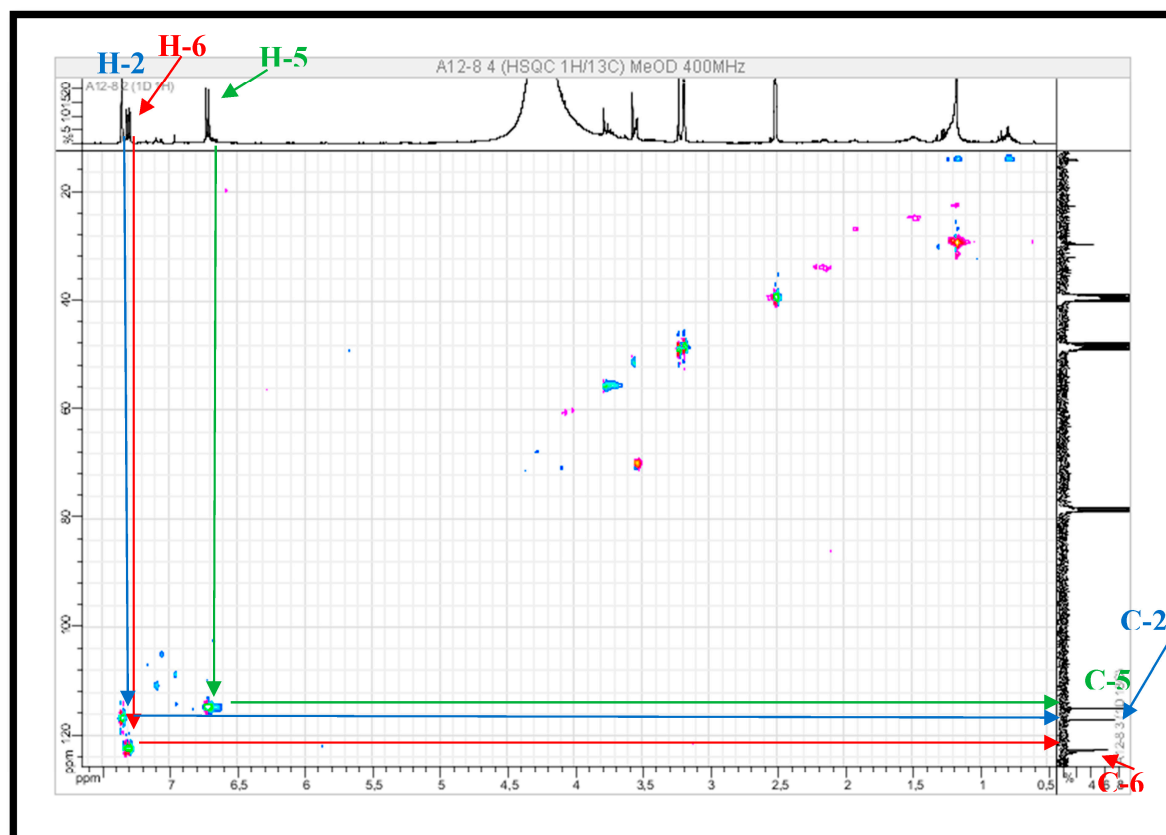

Figure S3. HSQC spectrum (400 MHz, CD<sub>3</sub>OD, δppm) of protocatechuic acid.

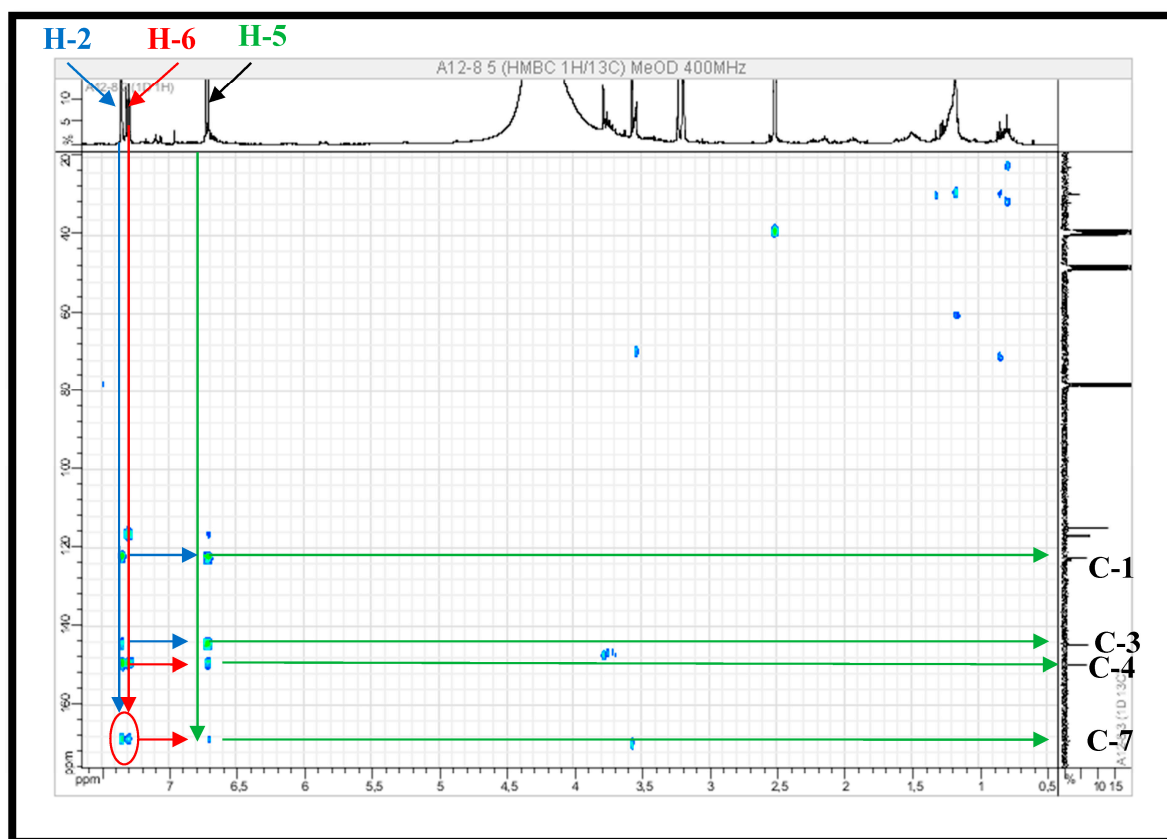

Figure S4. HMBC spectrum (400 MHz, CD<sub>3</sub>OD,  $\delta$ ppm) of protocatechuic acid.

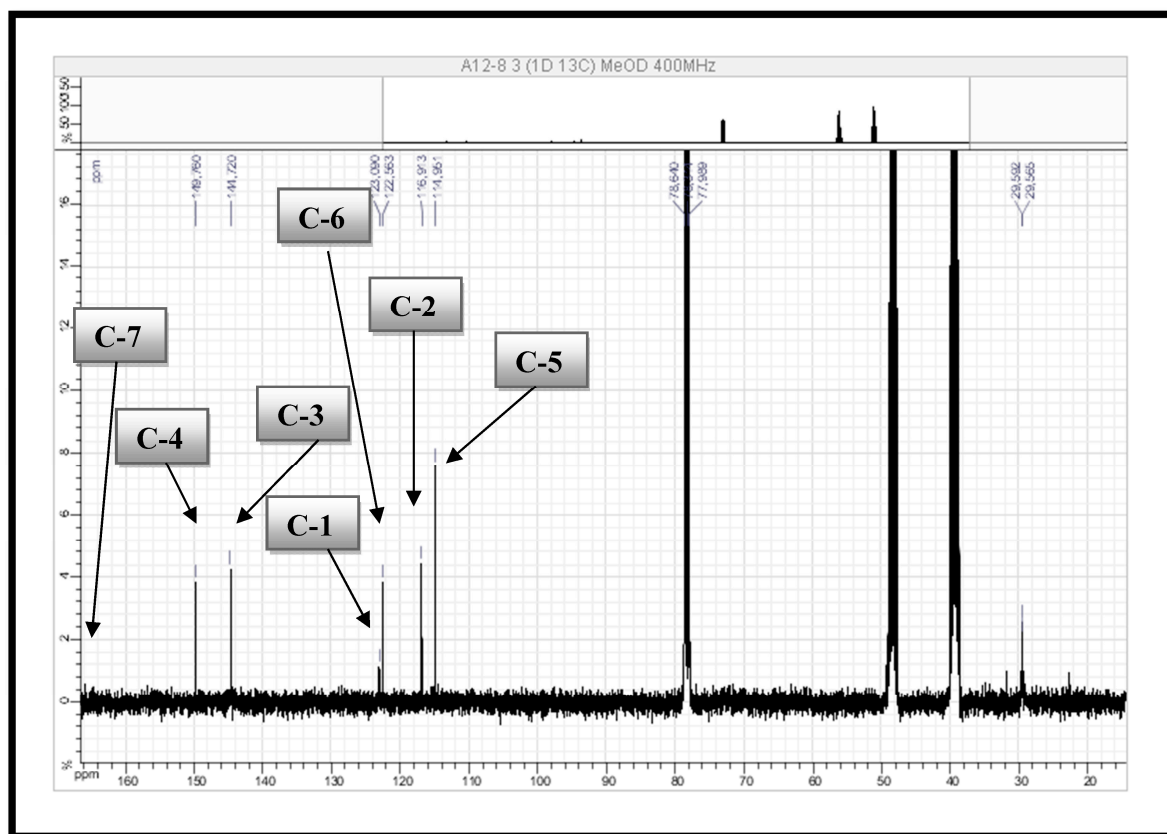

Figure S5. <sup>13</sup>C NMR spectrum (100 MHz, CD<sub>3</sub>OD,  $\delta$ ppm) of protocatechuic acid.

**Molecule 2:** *Trans*-tiliroside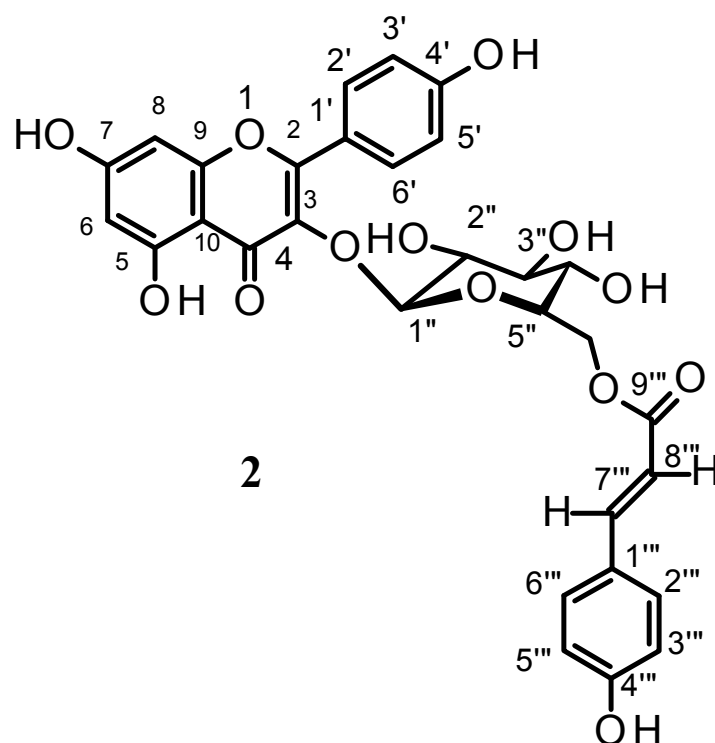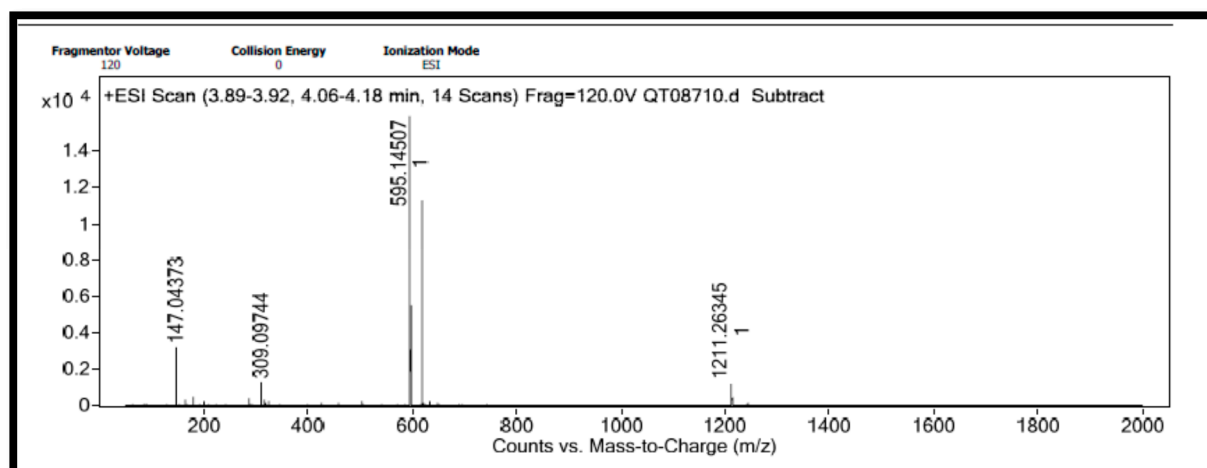**Figure S6.** ESI-HRMS(+) of *trans*-tiliroside.

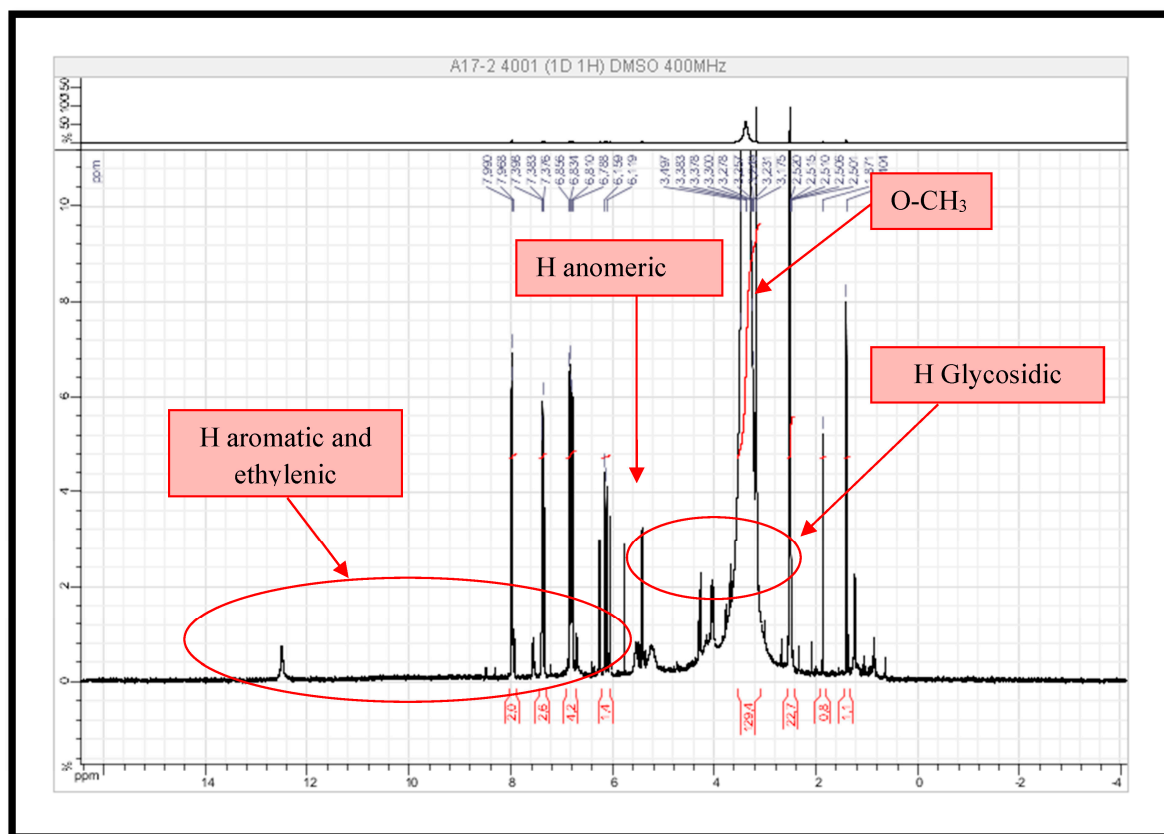

Figure S7. <sup>1</sup>H NMR spectrum (400 MHz, DMSO-*d*<sub>6</sub>, δppm) of *trans*-tiliroside.

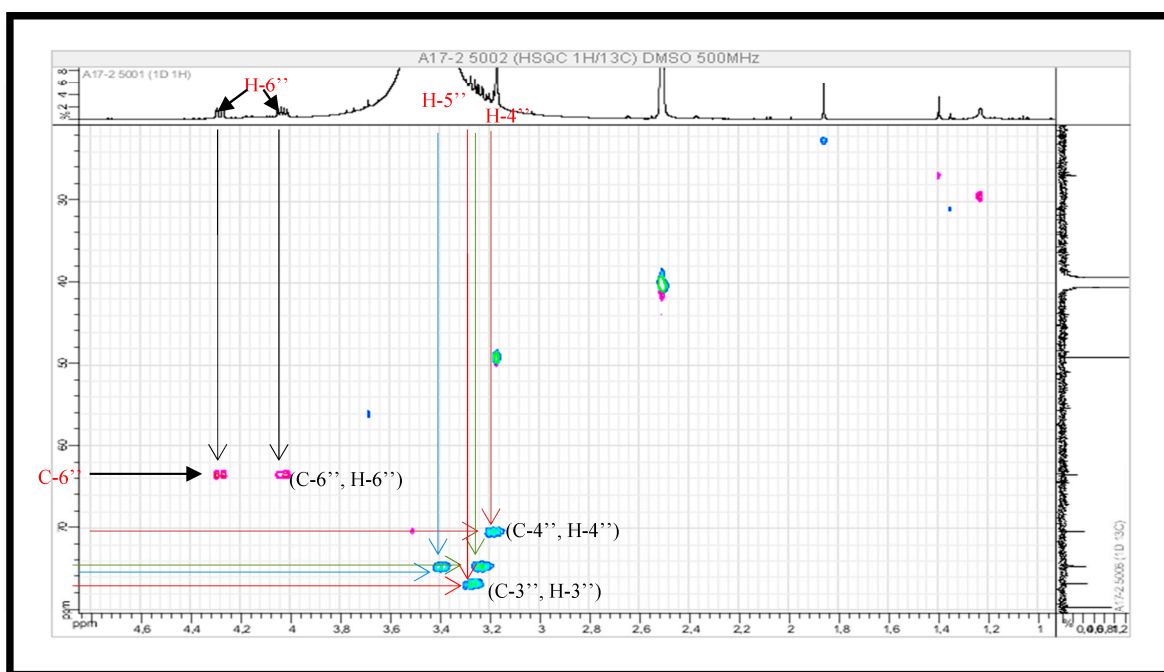

Figure S8. HSQC spectrum (spreading out 1) (500 MHz, DMSO-*d*<sub>6</sub>, δppm) of *trans*-tiliroside.



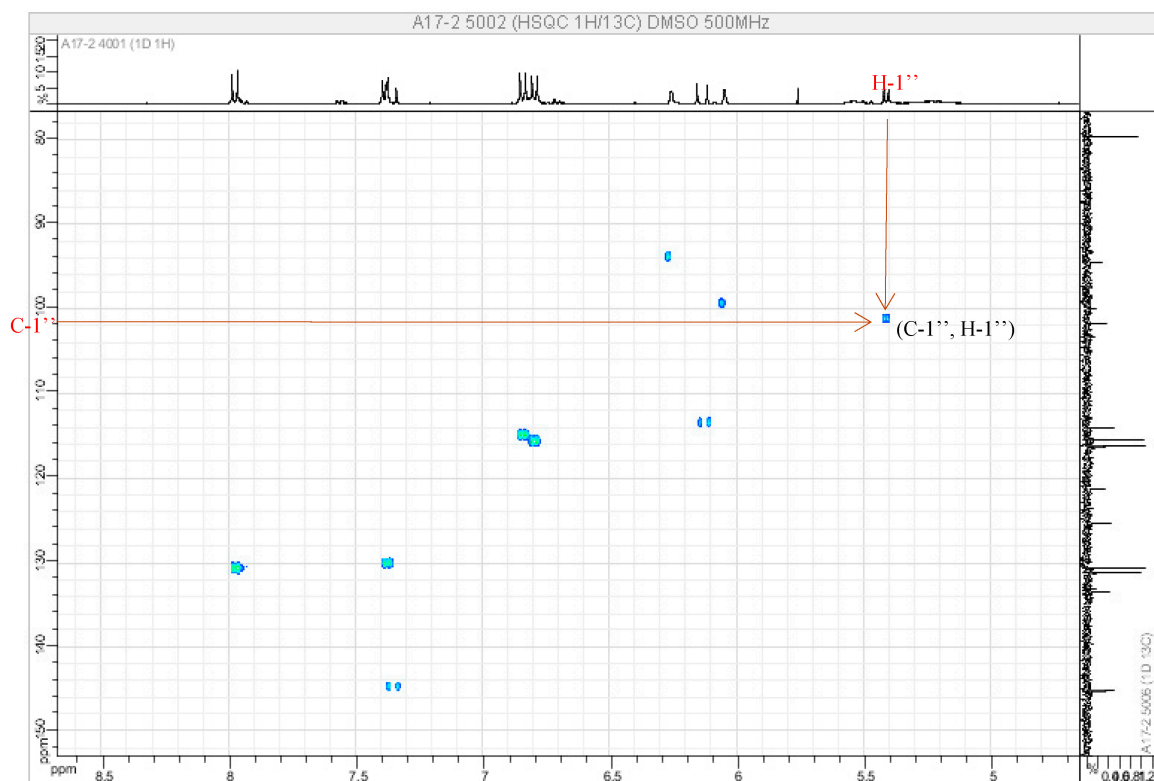

Figure S9. HSQC spectrum (spreading out 2) (500 MHz, DMSO- $d_6$ ,  $\delta$ ppm) of *trans*-tiliroside.

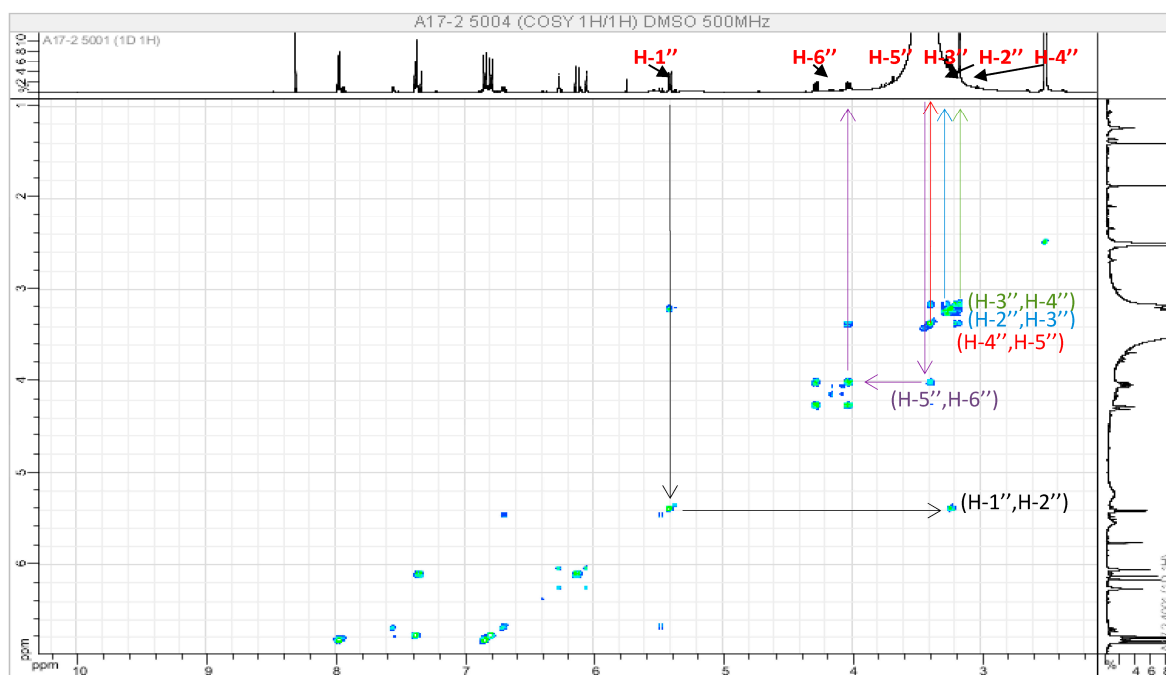

Figure S10. COSY spectrum (spreading out 1) (500 MHz, DMSO- $d_6$ ,  $\delta$ ppm) of *trans*-tiliroside.

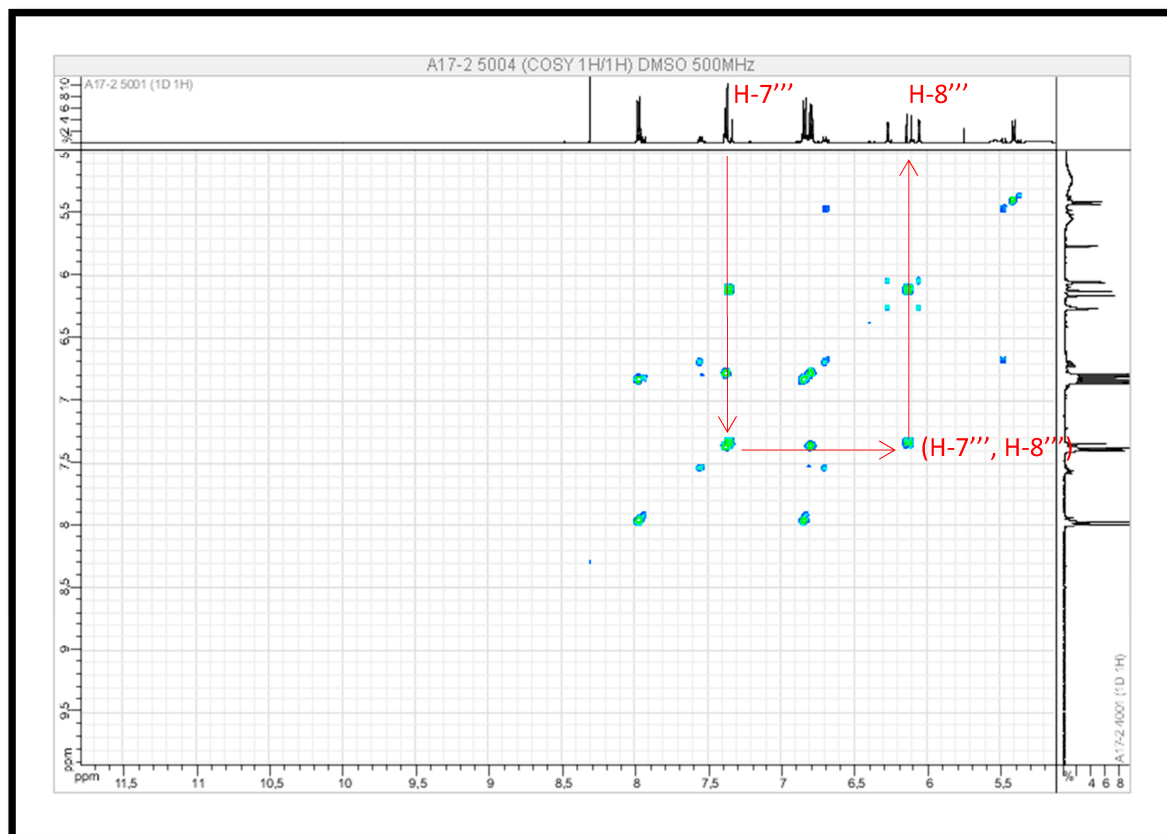

Figure S11. COSY spectrum (spreading out 2) (500 MHz, DMSO-*d*<sub>6</sub>, δppm) of *trans*-tiliroside.

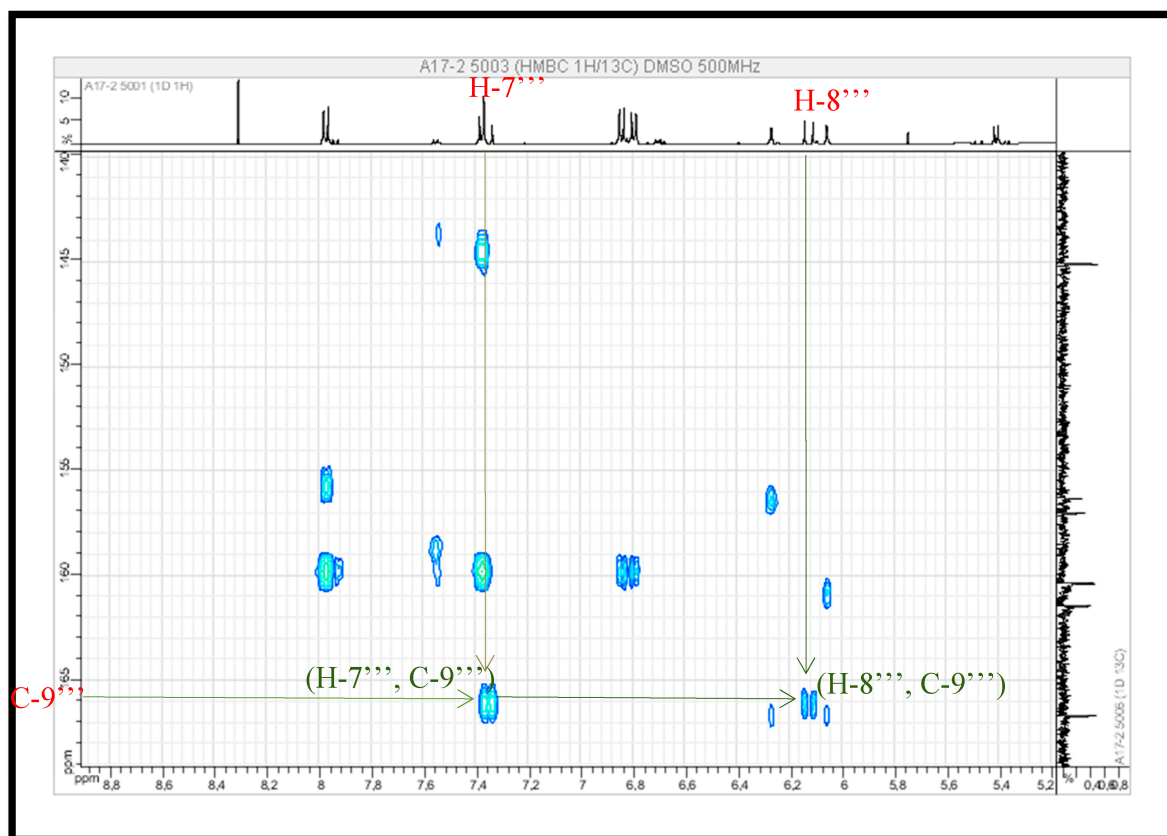

Figure S12. HMBC spectrum (spreading out 1) (500 MHz, DMSO-*d*<sub>6</sub>, δppm) of *trans*-tiliroside.

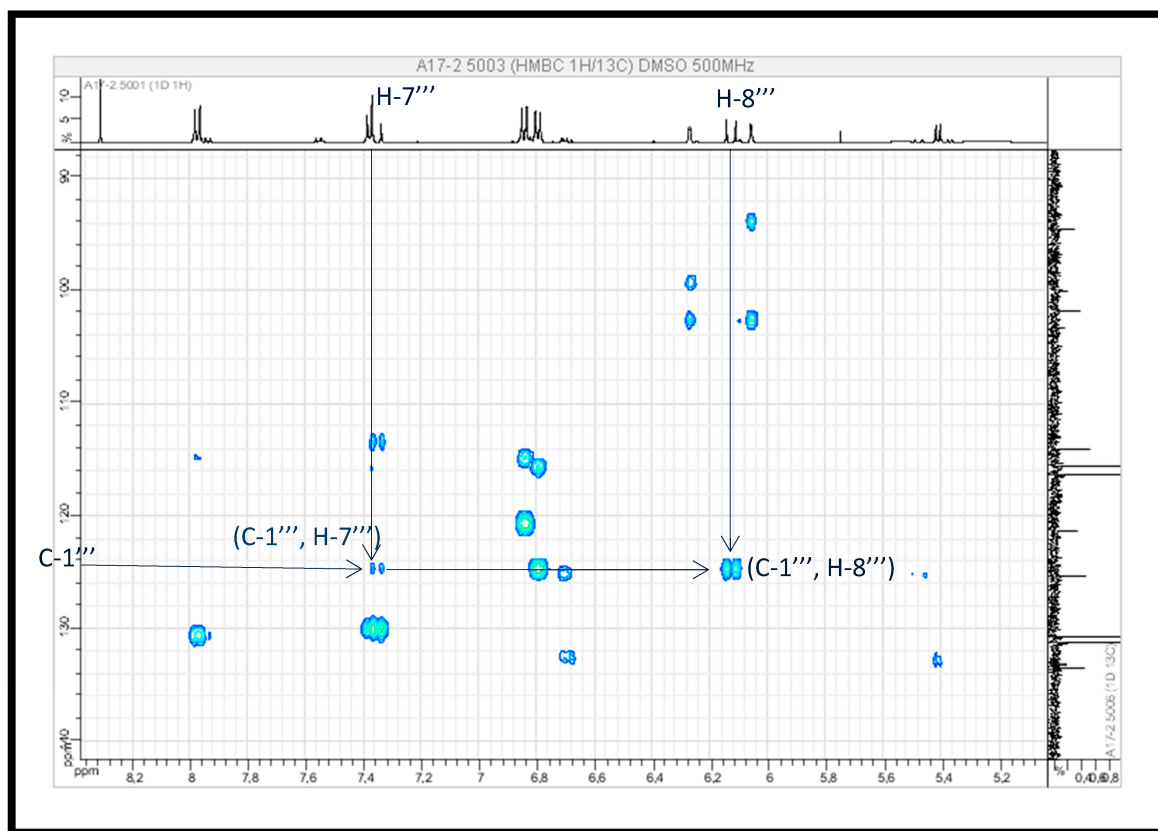

Figure S13. HMBC spectrum (spreading out 2) (500 MHz, DMSO- $d_6$ ,  $\delta$ ppm) of *trans*-tiliroside.

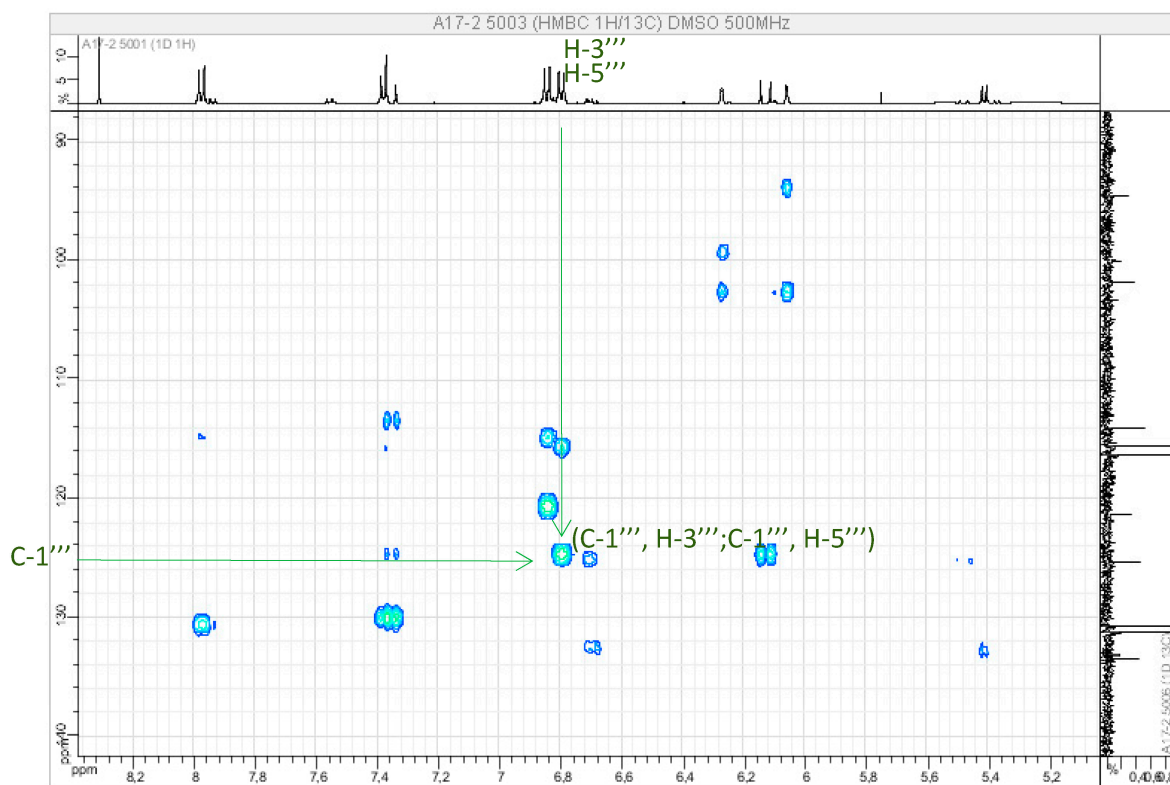

Figure S14. HMBC spectrum (spreading out 3) (500 MHz, DMSO- $d_6$ ,  $\delta$ ppm) of *trans*-tiliroside.

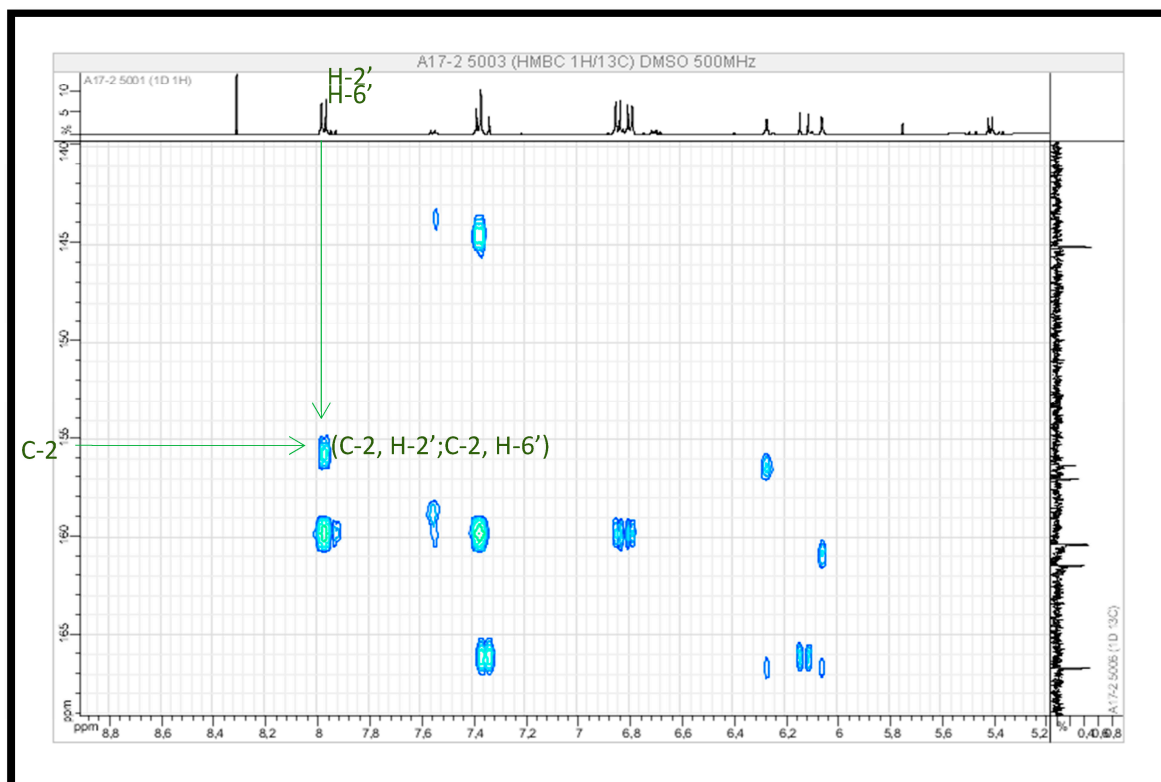

Figure S15. HMBC spectrum (spreading out 4) (500 MHz, DMSO- $d_6$ ,  $\delta$ ppm) of *trans*-tiliroside.

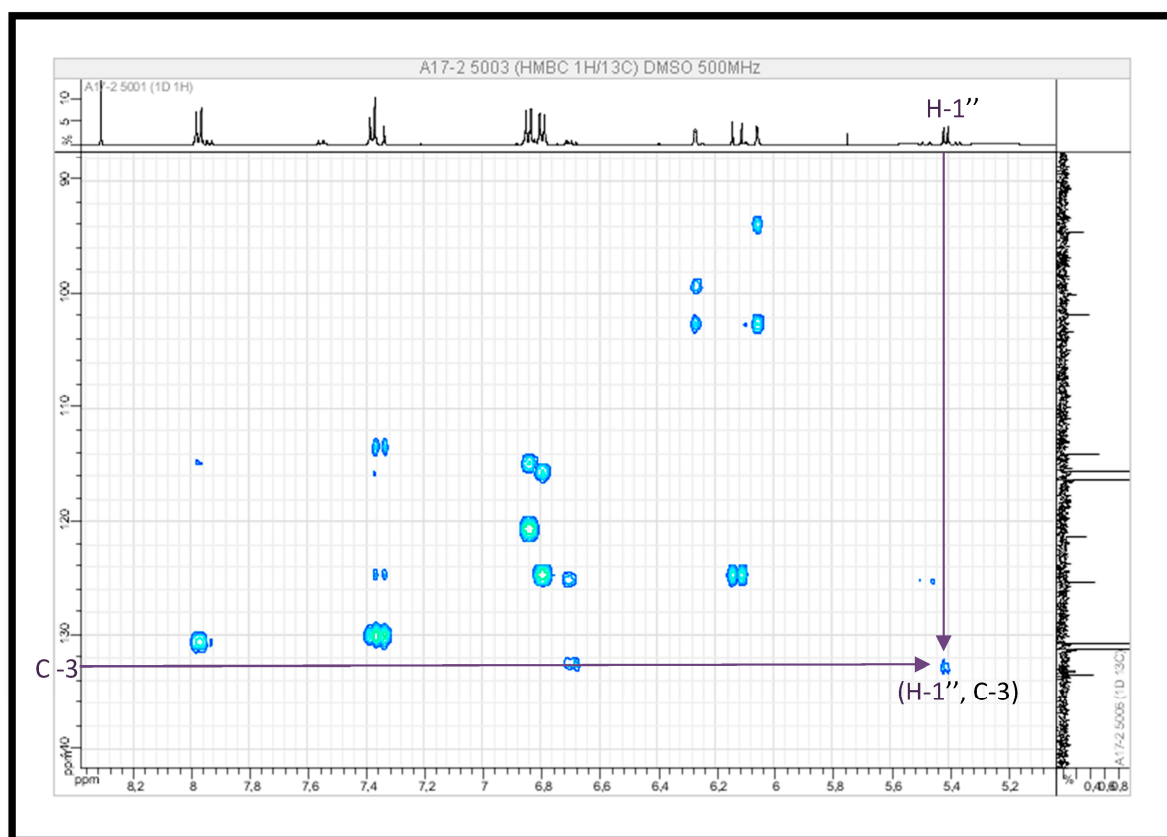

Figure S16. HMBC spectrum (spreading out 5) (500 MHz, DMSO- $d_6$ ,  $\delta$ ppm) of *trans*-tiliroside.

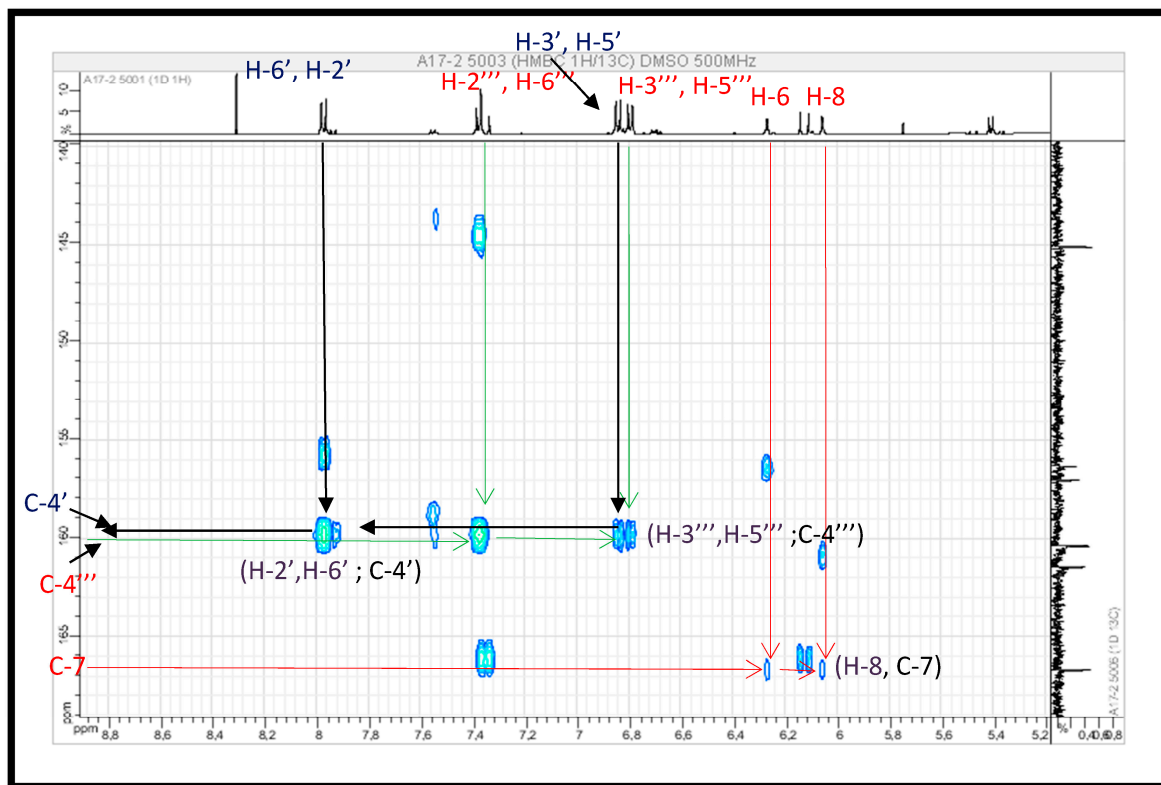

Figure S17. HMBC spectrum (spreading out 6) (500 MHz, DMSO-*d*<sub>6</sub>, δppm) of *trans*-tiliroside.

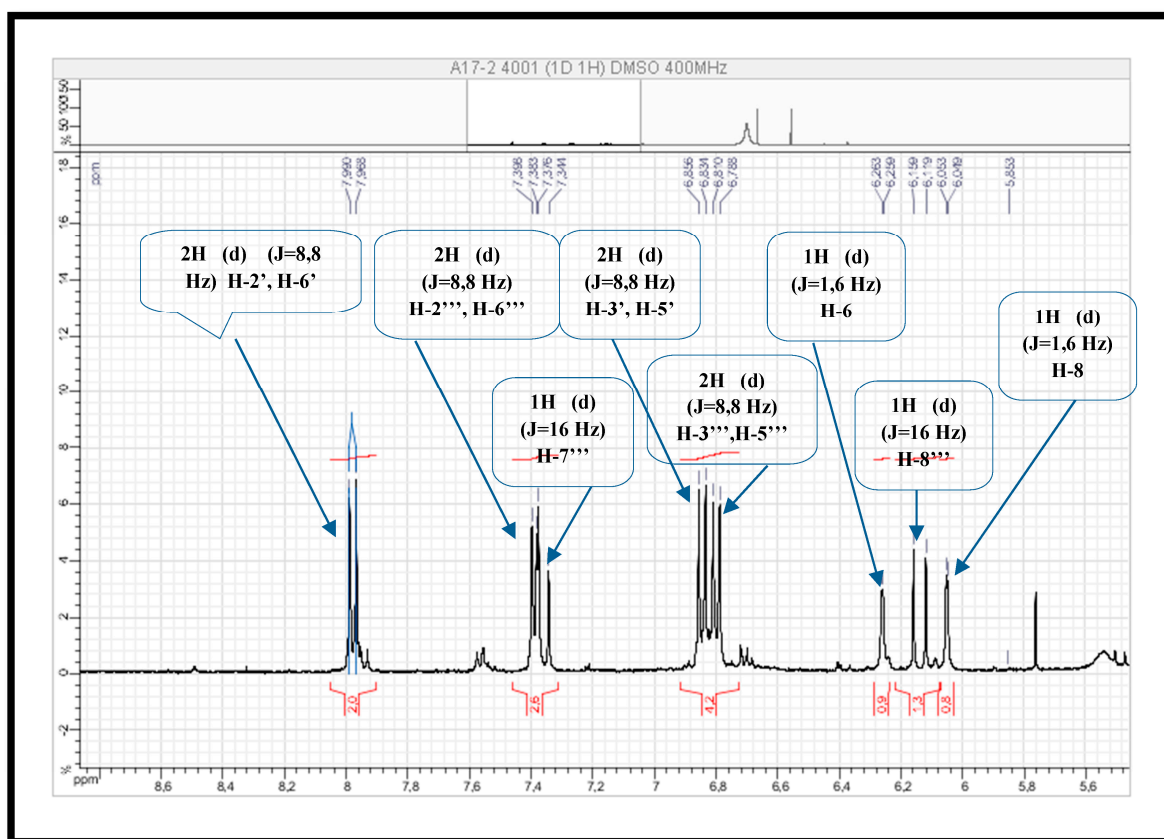

Figure S18. <sup>1</sup>H NMR spectrum (400 MHz, DMSO-*d*<sub>6</sub>, δppm) of *trans*-tiliroside.

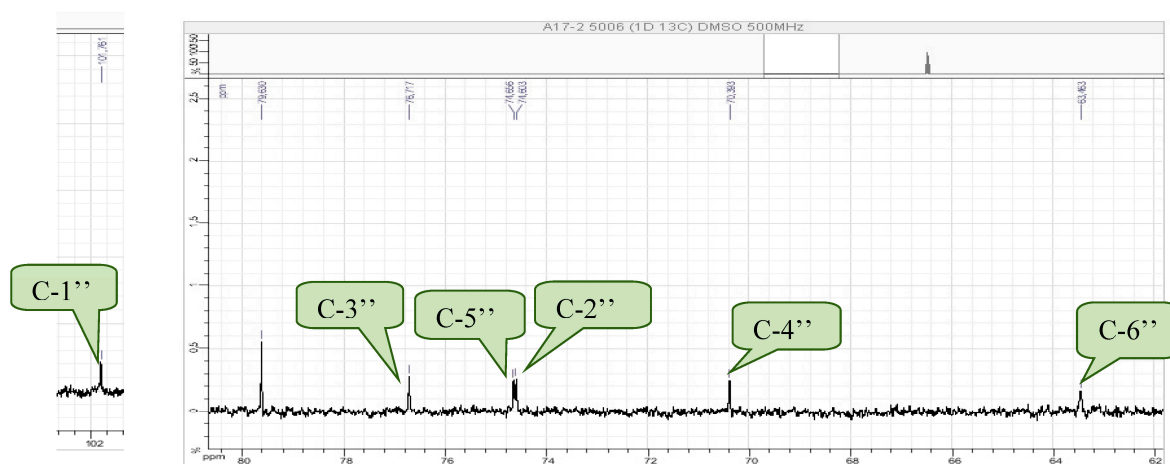

Figure S19. <sup>13</sup>C NMR spectrum (spreading out 1) (125 MHz, DMSO-*d*<sub>6</sub>, δppm) of *trans*-tiliroside.

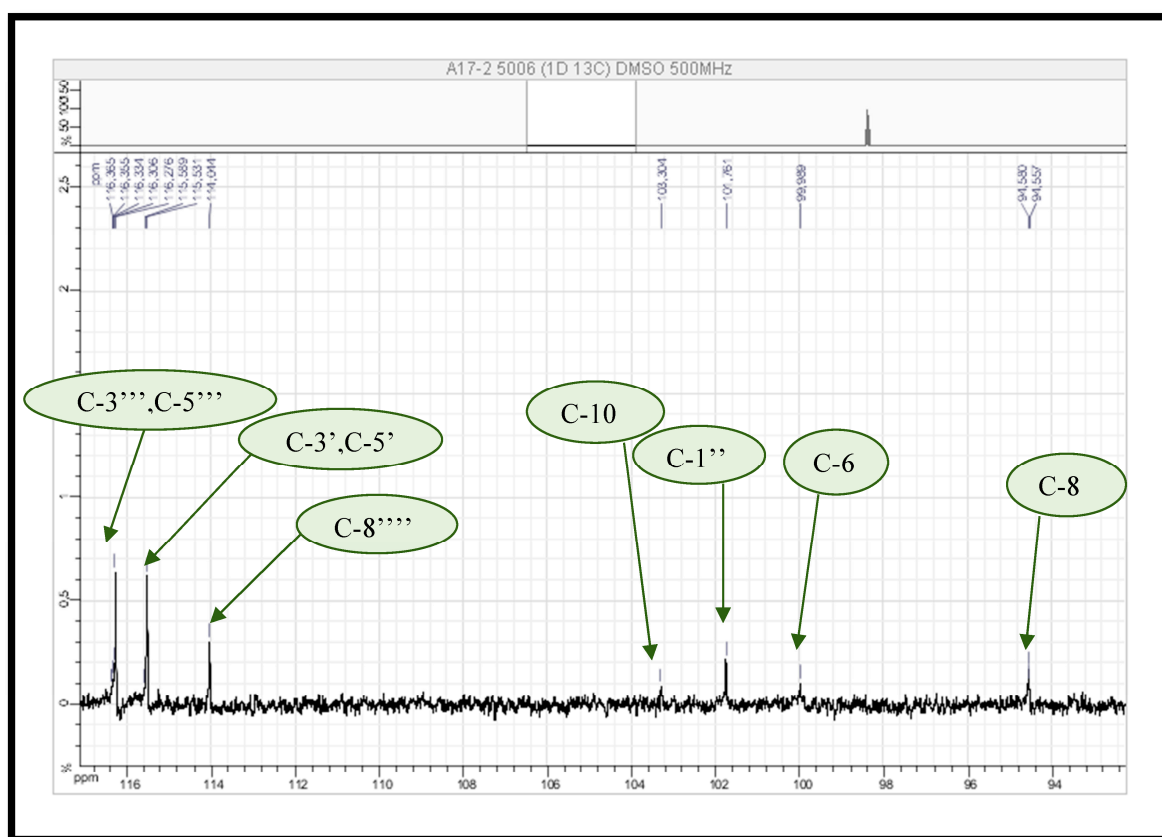

Figure S20. <sup>13</sup>C NMR spectrum (spreading out 2) (125 MHz, DMSO-*d*<sub>6</sub>, δppm) of *trans*-tiliroside.

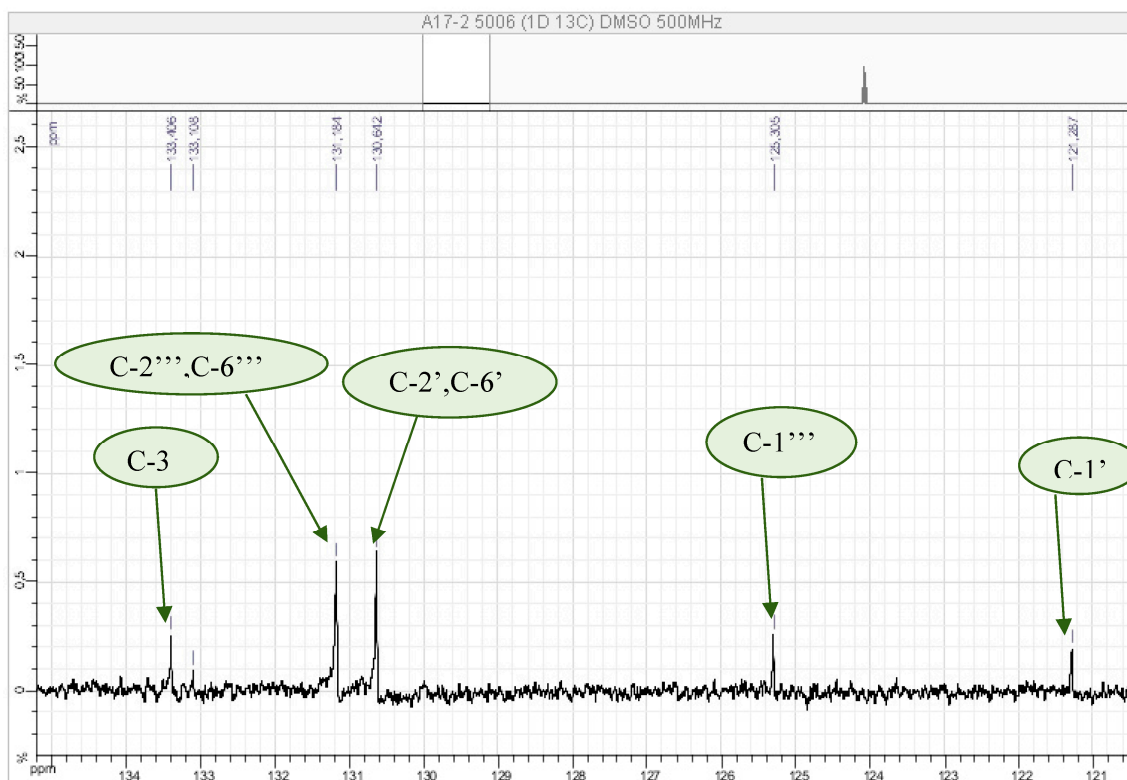

Figure S21. <sup>13</sup>C NMR spectrum (spreading out 3) (125 MHz, DMSO-*d*<sub>6</sub>, δppm) of *trans*-tiliroside.

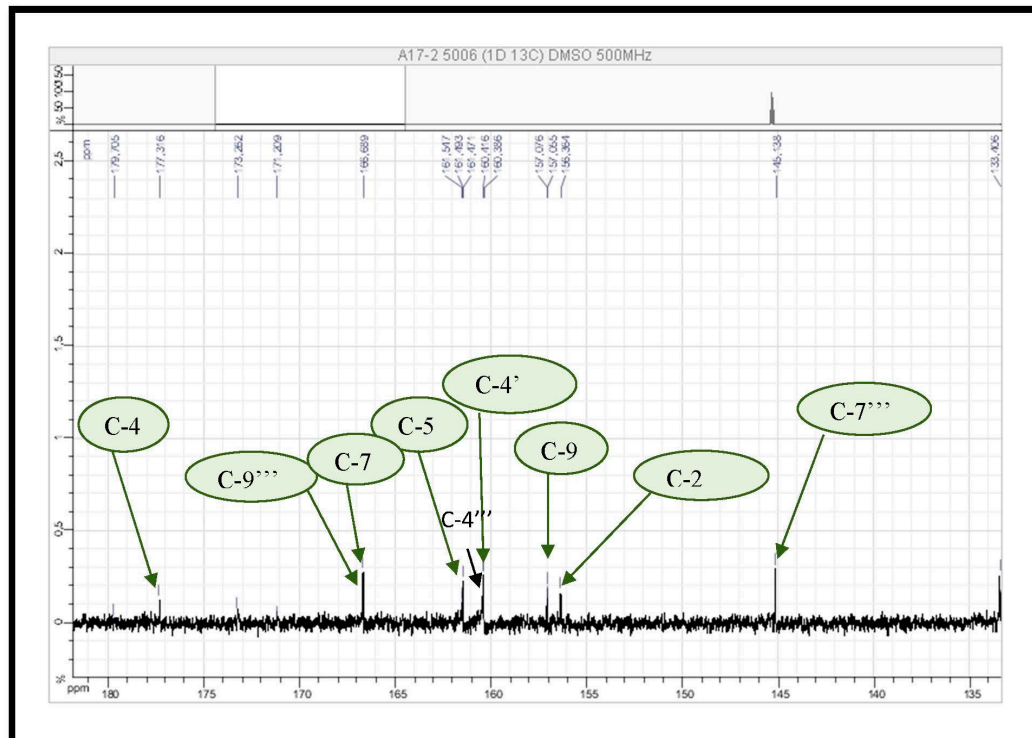

Figure S22. <sup>13</sup>C NMR spectrum (spreading out 4) (125 MHz, DMSO-*d*<sub>6</sub>, δppm) of *trans*-tiliroside.

Molecule 3: *Cis*-tiliroside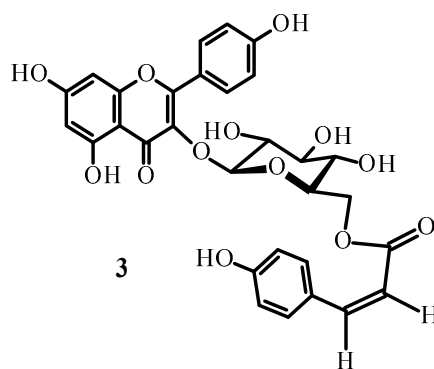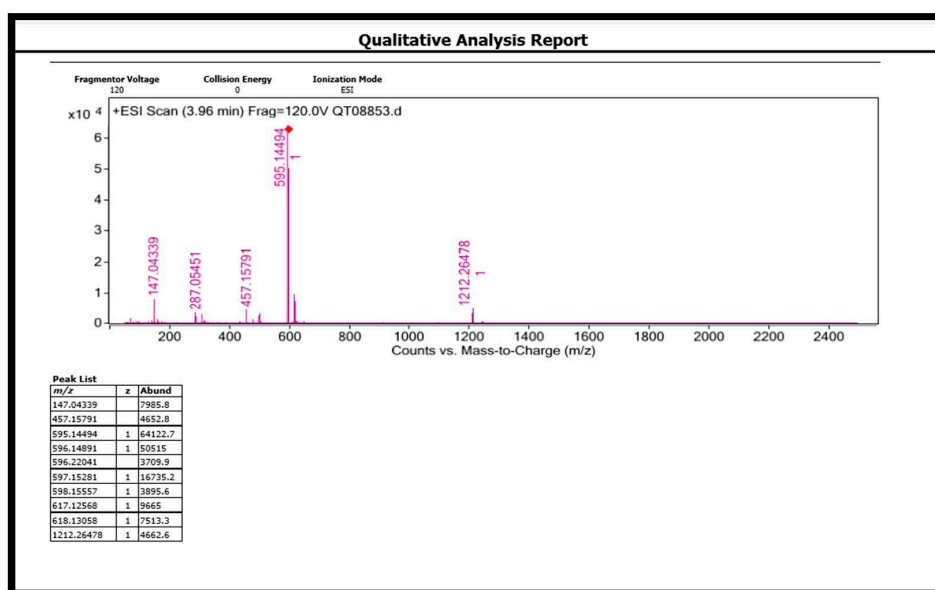Figure S23. ESI-HRMS(+) of *cis*-tiliroside.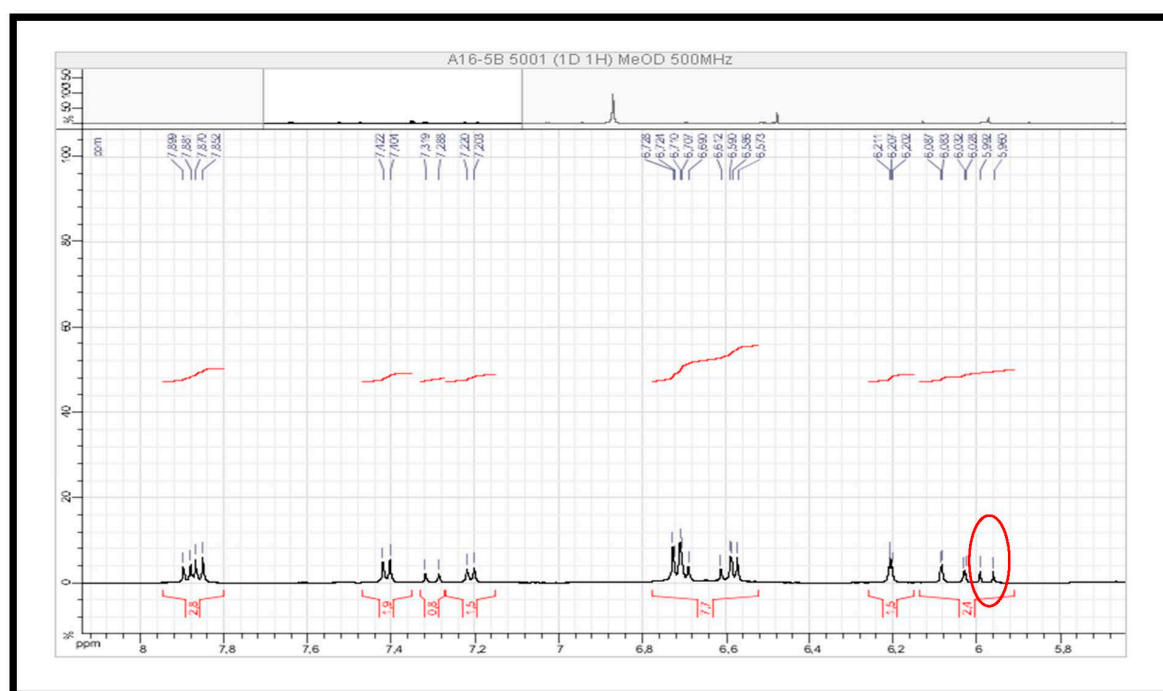Figure S24. <sup>1</sup>H NMR spectrum (spreading out 1) (500 MHz, CD<sub>3</sub>OD, δppm) of *cis*-tiliroside.



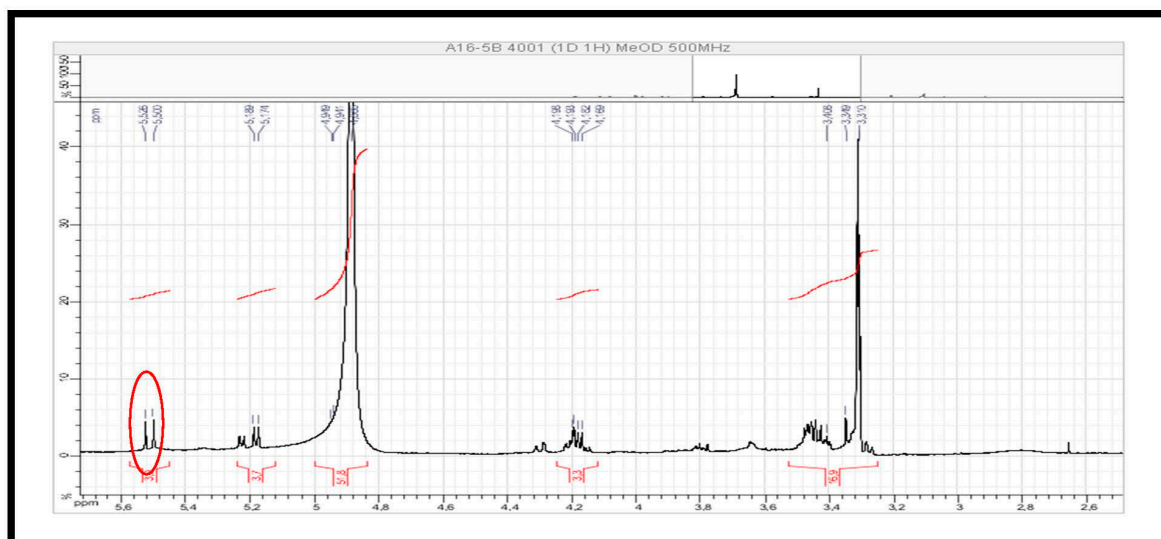

Figure S25.  $^1\text{H}$  NMR spectrum (spreading out 2) (500 MHz,  $\text{CD}_3\text{OD}$ ,  $\delta\text{ppm}$ ) of *cis*-tiliroside.

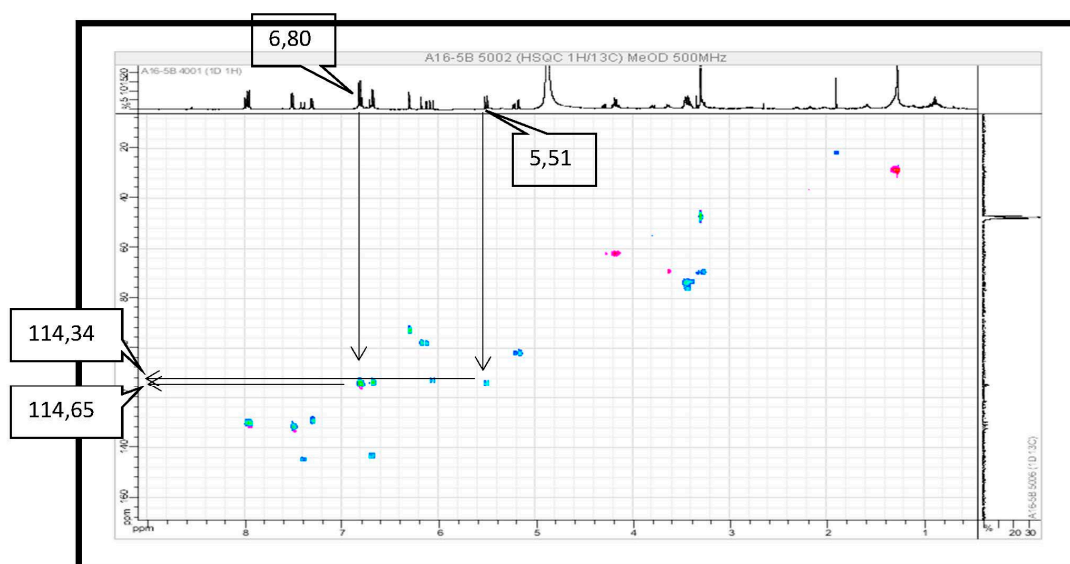

Figure S26. HSQC NMR spectrum (500 MHz,  $\text{CD}_3\text{OD}$ ,  $\delta\text{ppm}$ ) of *cis*-tiliroside.

#### Molecule 4: Astragalin

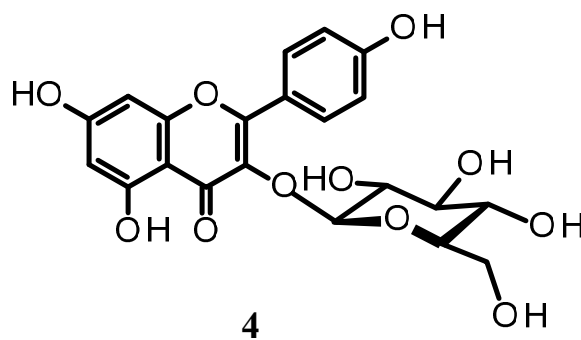

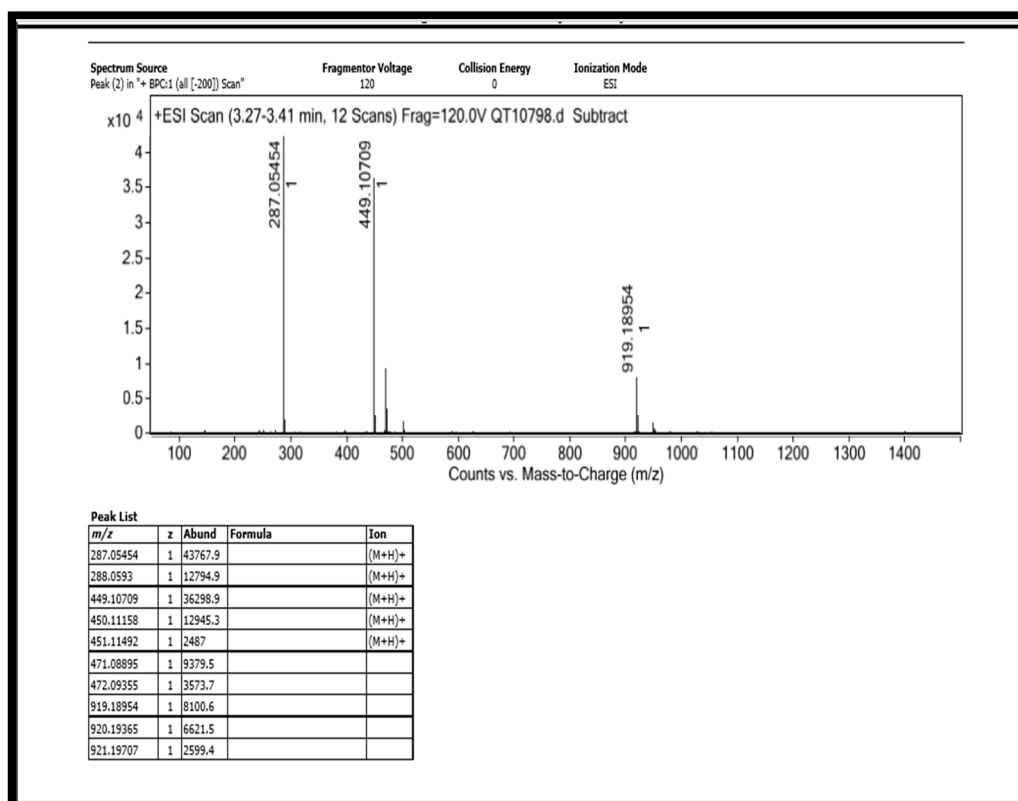

Figure S27. ESI-HRMS(+) of astragalinal.

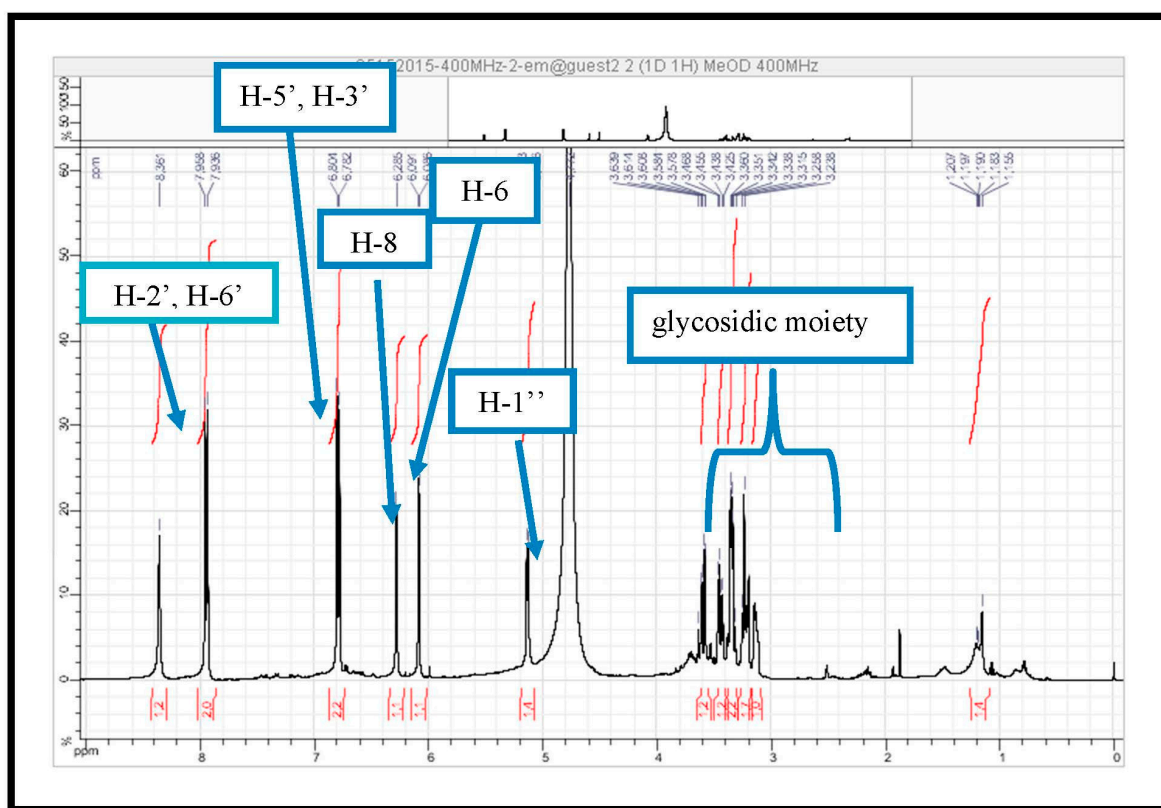Figure S28. <sup>1</sup>H NMR spectrum (400 MHz, CD<sub>3</sub>OD, δppm) of astragalinal.

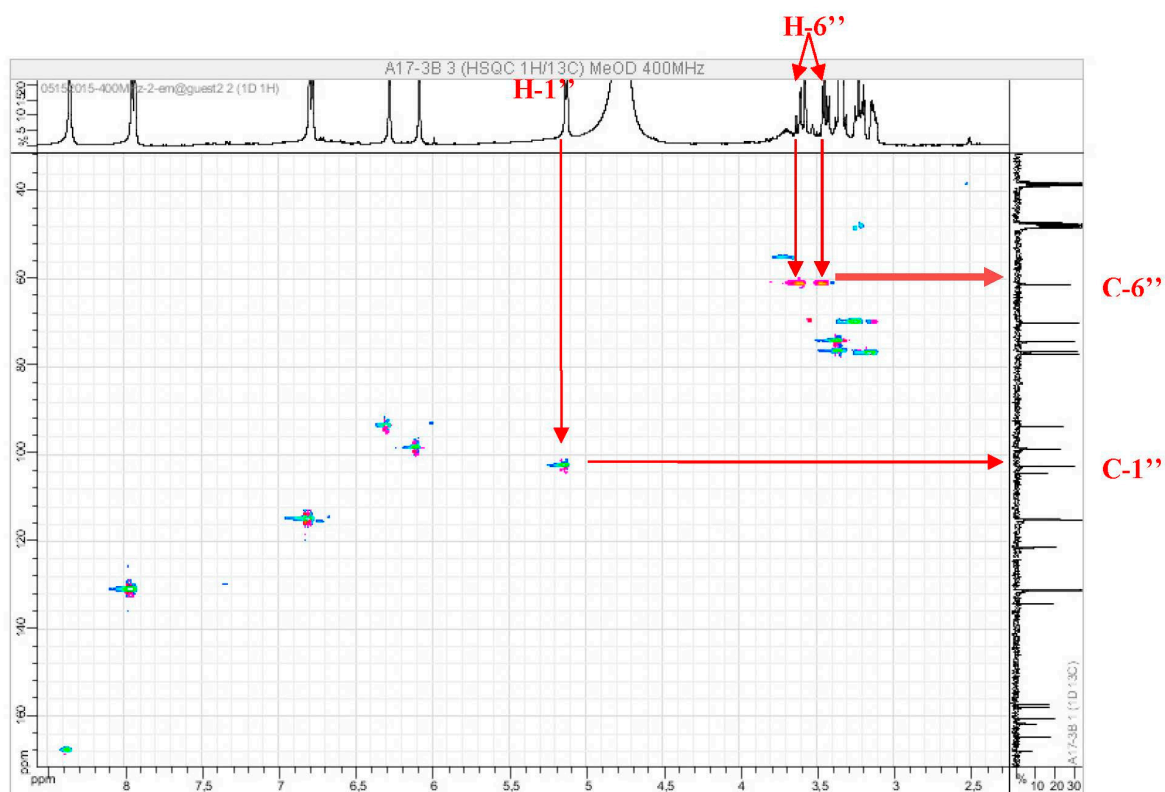

Figure S29. HSQC spectrum (400 MHz,  $\text{CD}_3\text{OD}$ ,  $\delta\text{ppm}$ ) of astragaline.

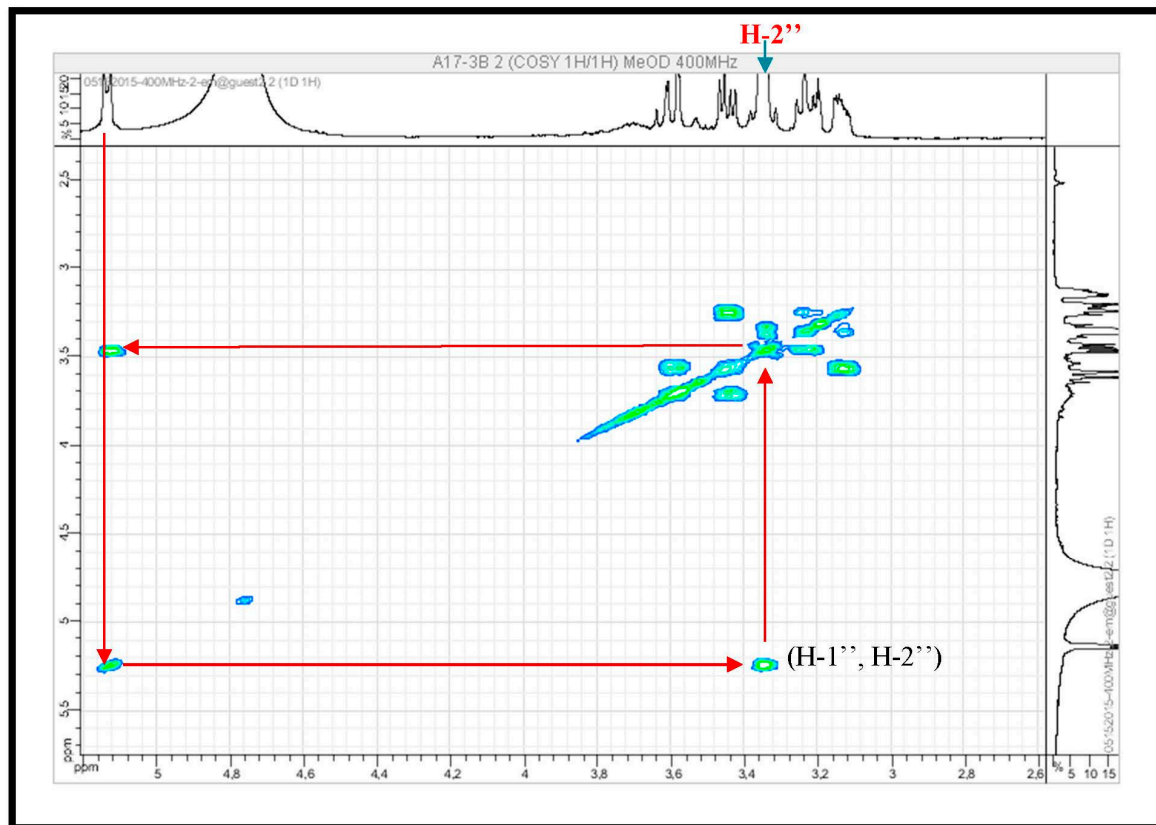

Figure S30. COSY spectrum (400 MHz,  $\text{CD}_3\text{OD}$ ,  $\delta\text{ppm}$ ) of astragaline.

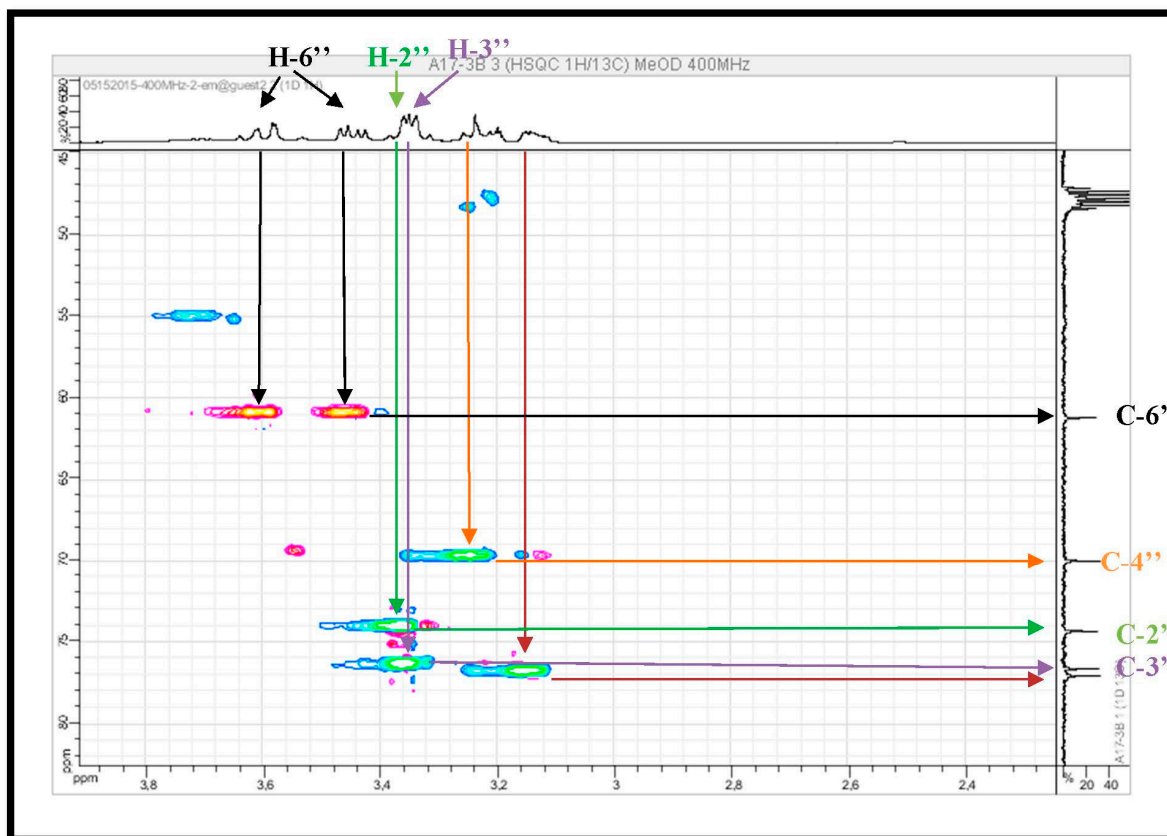

Figure S31. HSQC spectrum (400 MHz, CD<sub>3</sub>OD, δppm) of astragalins.

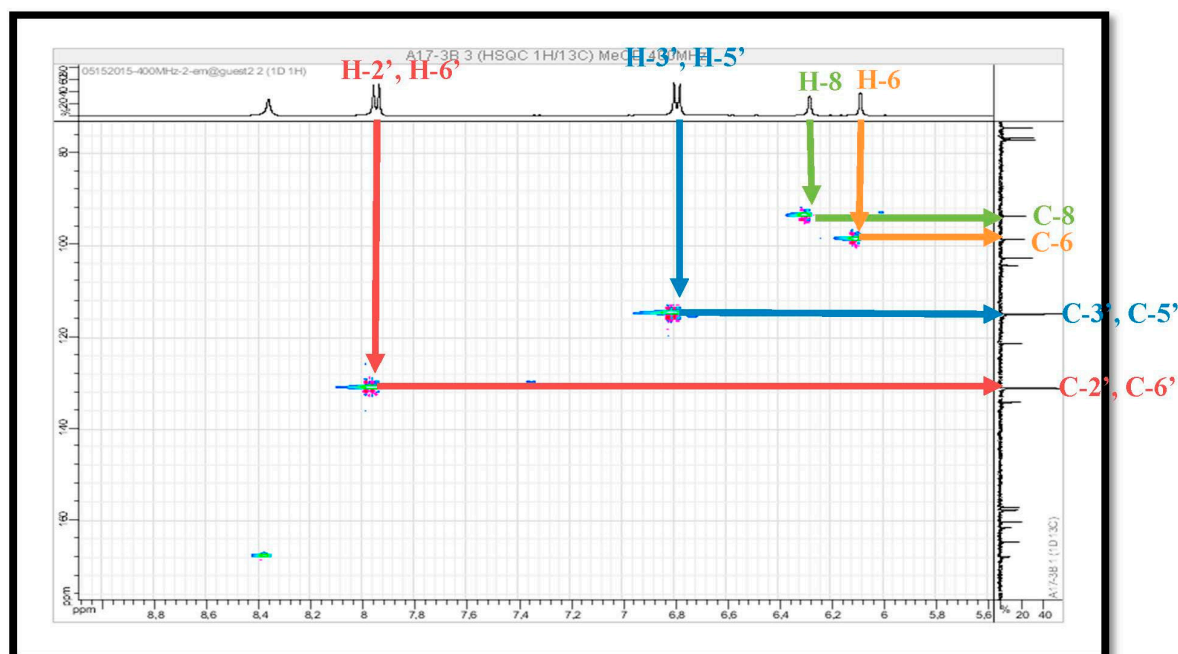

Figure S32. HSQC spectrum (spreading out 1) (400 MHz, CD<sub>3</sub>OD, δppm) of astragalins.

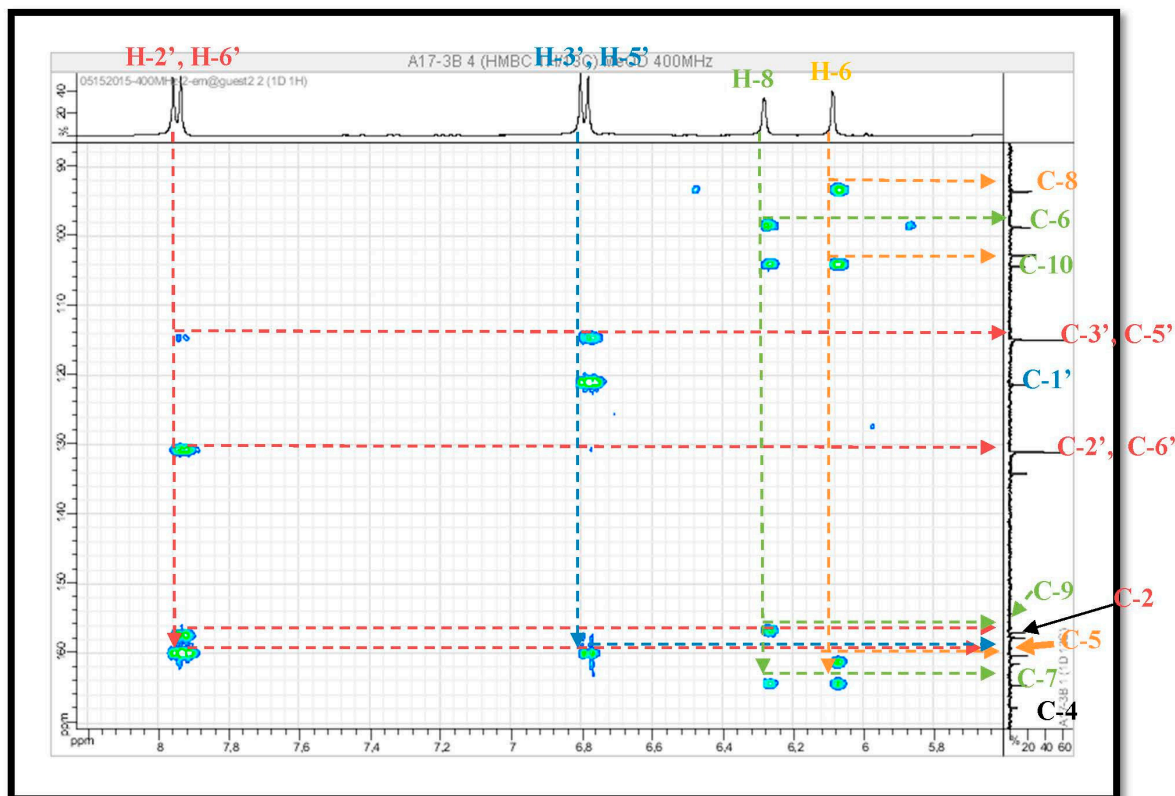

Figure S33. HMBC spectrum (spreading out1) (400 MHz, CD<sub>3</sub>OD, δppm) of astragalins.

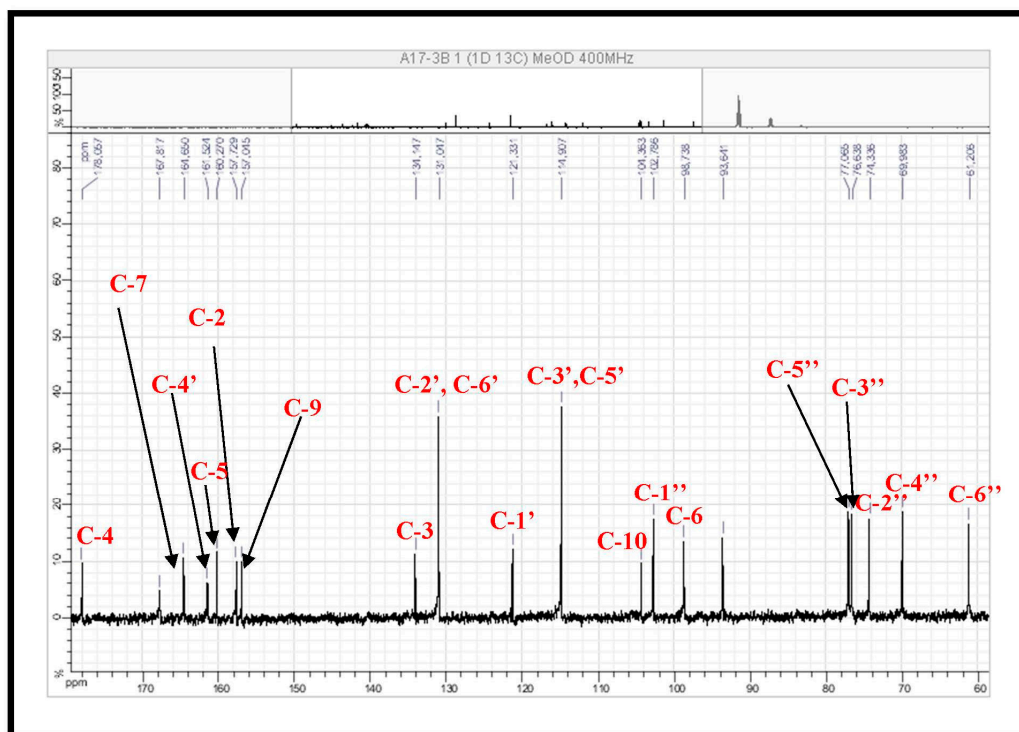

Figure S34. <sup>13</sup>C spectrum (100 MHz, CD<sub>3</sub>OD, δppm) of astragalins.

## Molecule 7: Picein

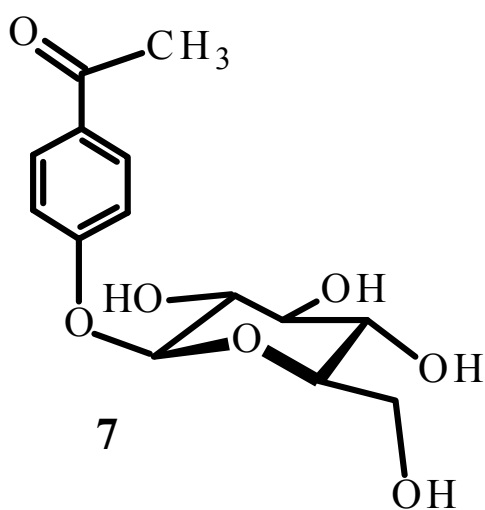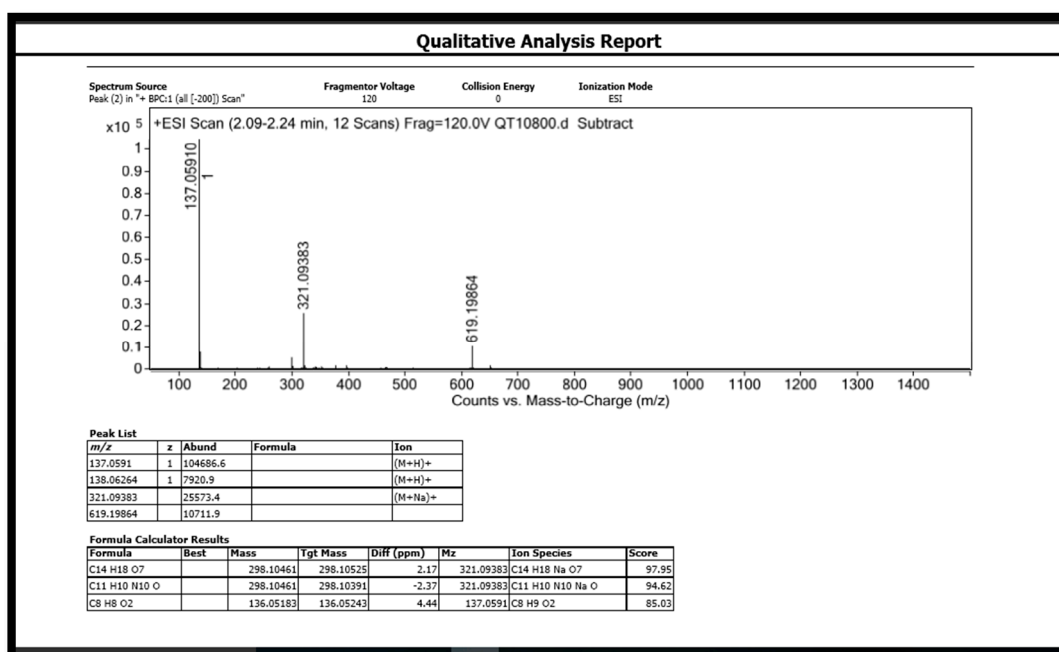

Figure S35. ESI-HRMS(+) of picein.

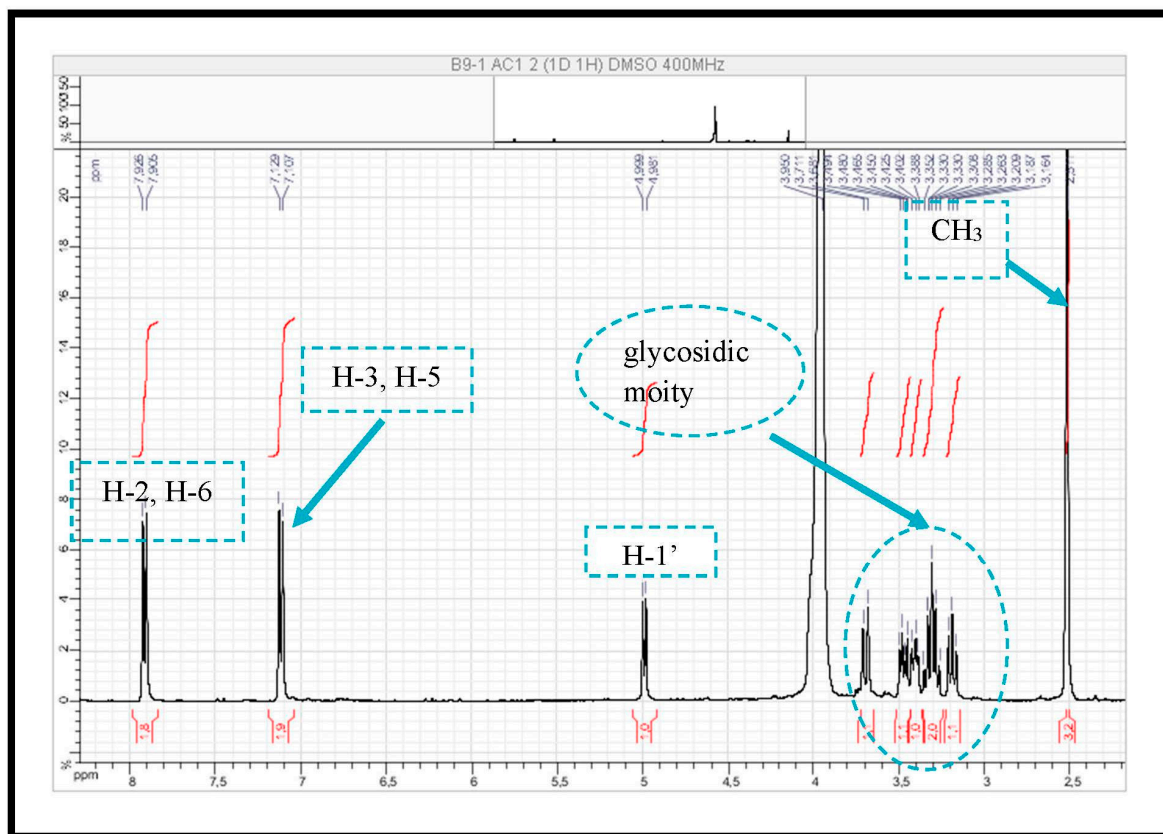

Figure S36. <sup>1</sup>H NMR spectrum (spreading out1) (400 MHz, DMSO-*d*<sub>6</sub>, δppm) of picein.

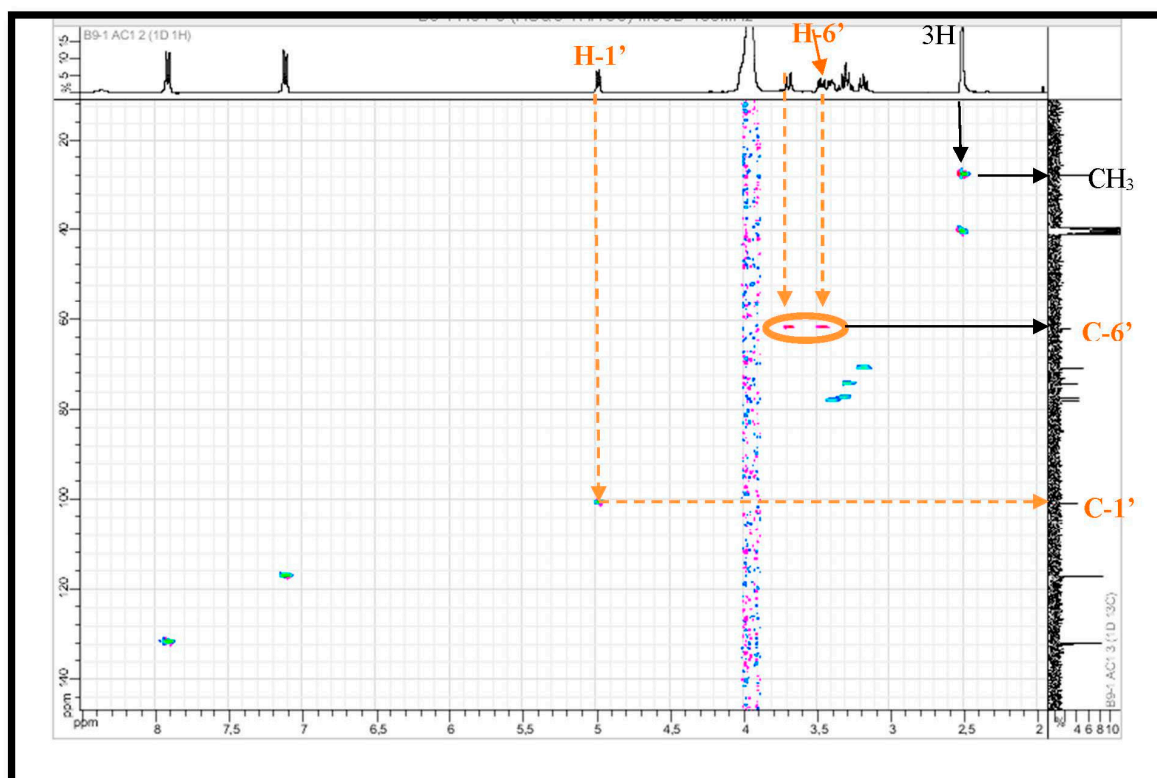

Figure S37. HSQC NMR spectrum (400 MHz, DMSO-*d*<sub>6</sub>, δppm) of picein.

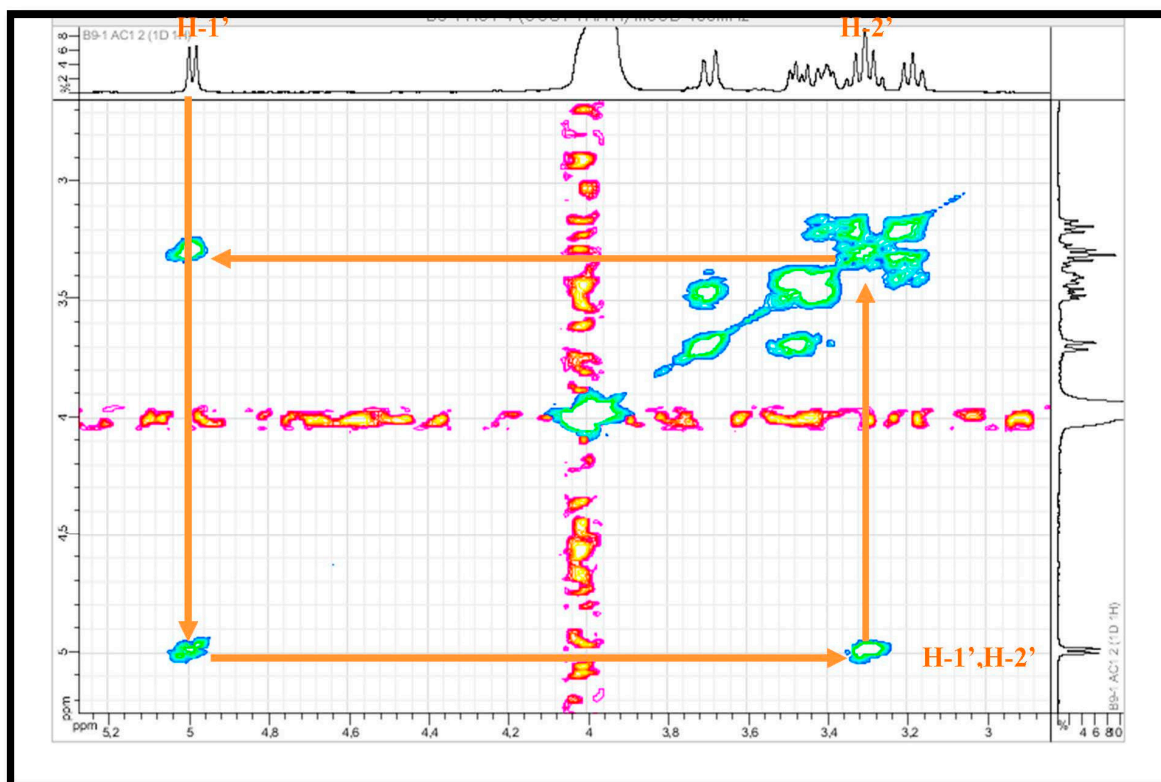

Figure S38. COSY NMR spectrum (400 MHz, DMSO-*d*<sub>6</sub>, δppm) of picein.

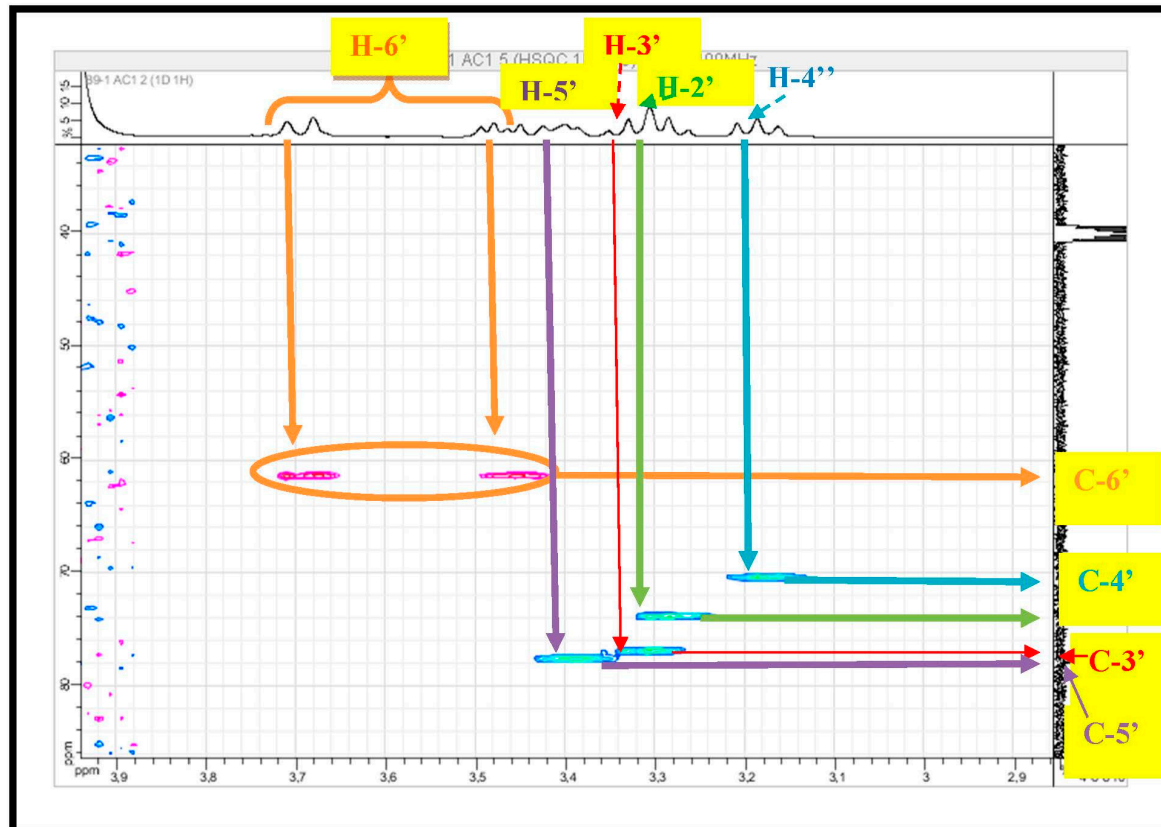

Figure S39. HSQC NMR spectrum (spreading out 1) (400 MHz, DMSO-*d*<sub>6</sub>, δppm) of picein.



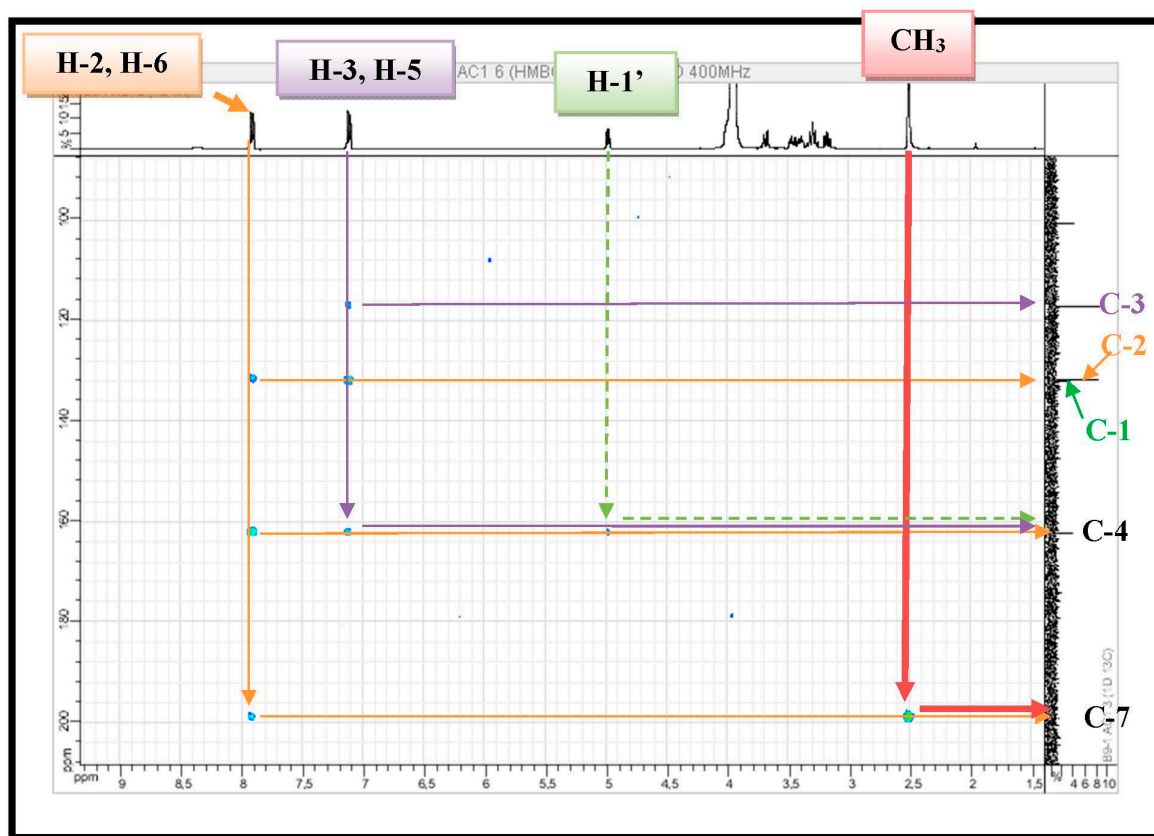

Figure S40. HMBC NMR spectrum (400 MHz, DMSO-*d*<sub>6</sub>, δppm) of picein.

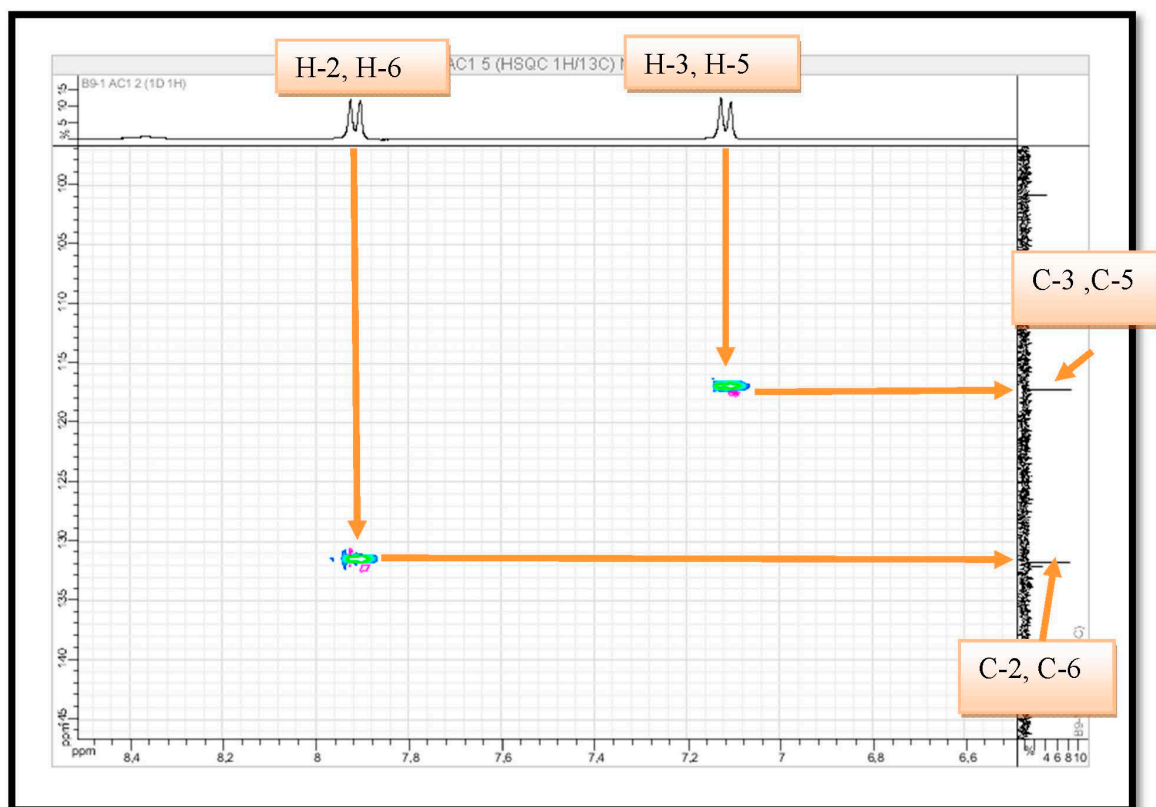

Figure S41. HSQC NMR spectrum (spreading out 2) (400 MHz, DMSO-*d*<sub>6</sub>, δppm) of picein.

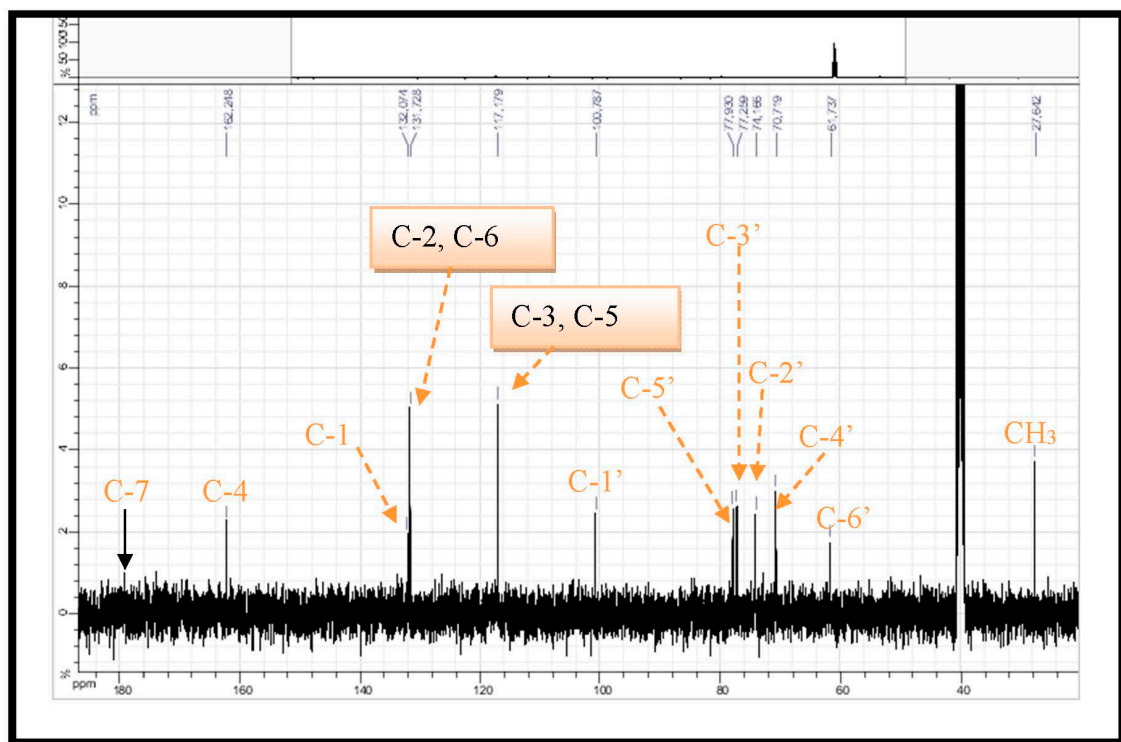

Figure S42.  $^{13}\text{C}$  NMR spectrum (spreading out 1) (100 MHz,  $\text{DMSO-}d_6$ ,  $\delta\text{ppm}$ ) of picein.

Molecule 8: Vanillic acid 4-*O*- $\beta$ -D-glucopyranoside

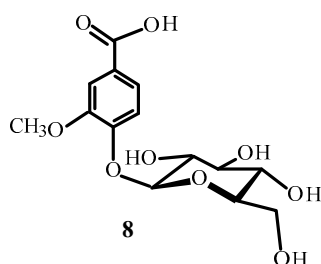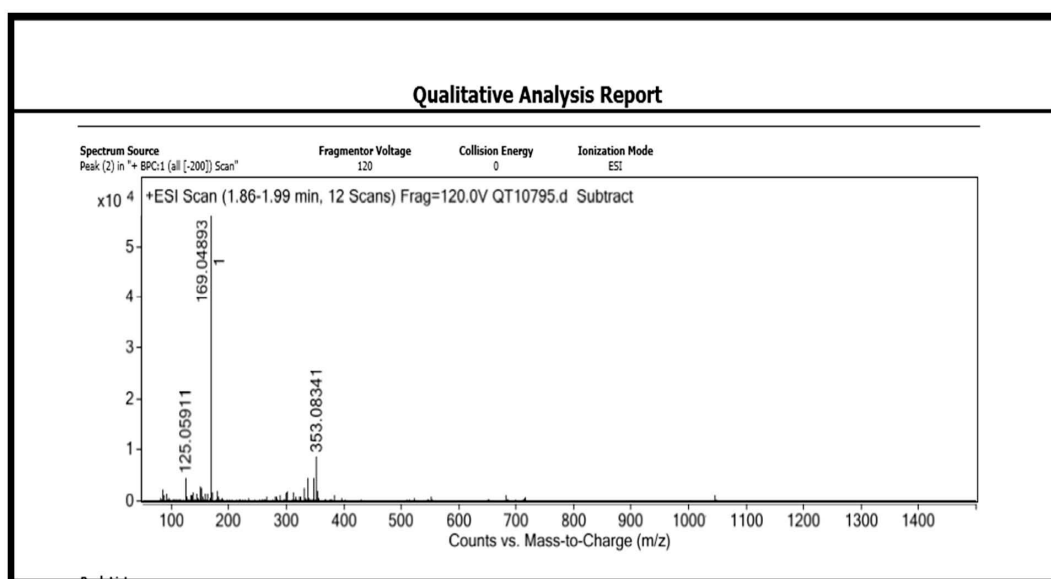

Figure S43. ESI-HRMS(+) of Vanillic acid 4-*O*- $\beta$ -D-glucopyranoside.

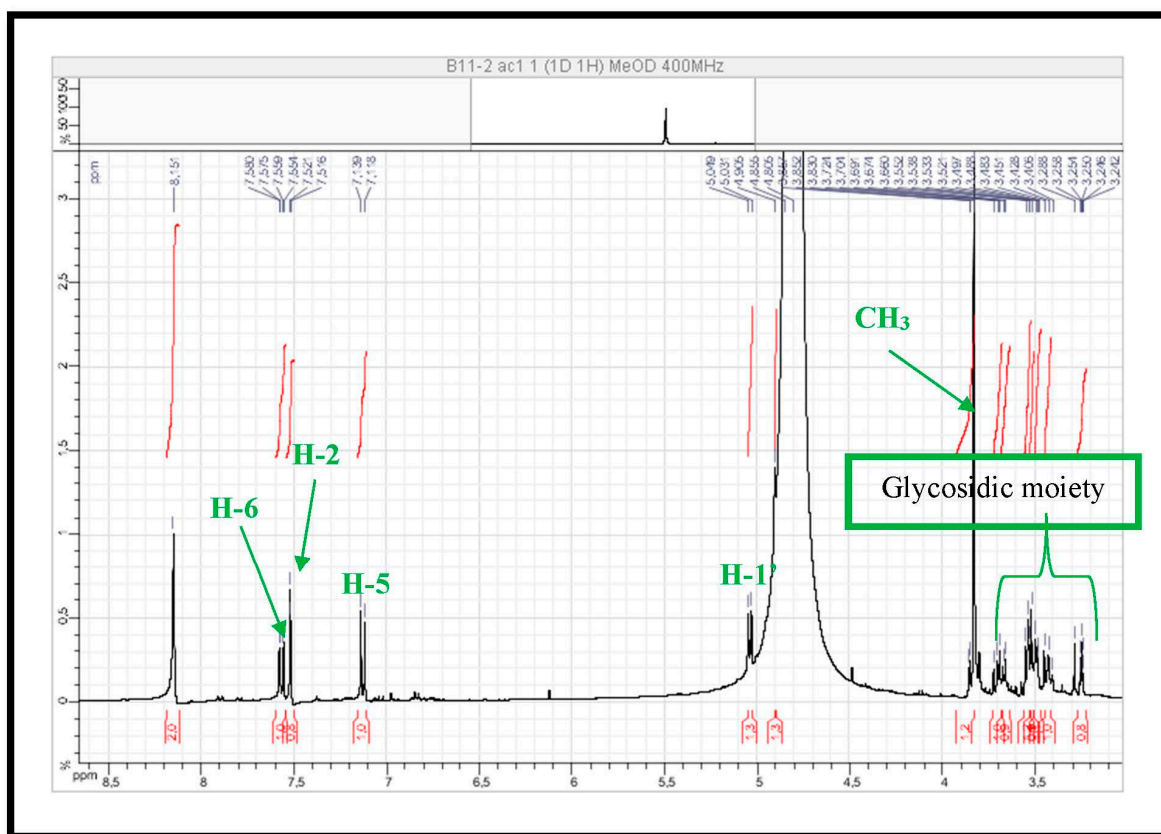

Figure S44.  $^1\text{H}$  NMR spectrum (400 MHz,  $\text{CD}_3\text{OD}$ ,  $\delta\text{ppm}$ ) of Vanillic acid 4-O- $\beta$ -D-glucopyranoside.

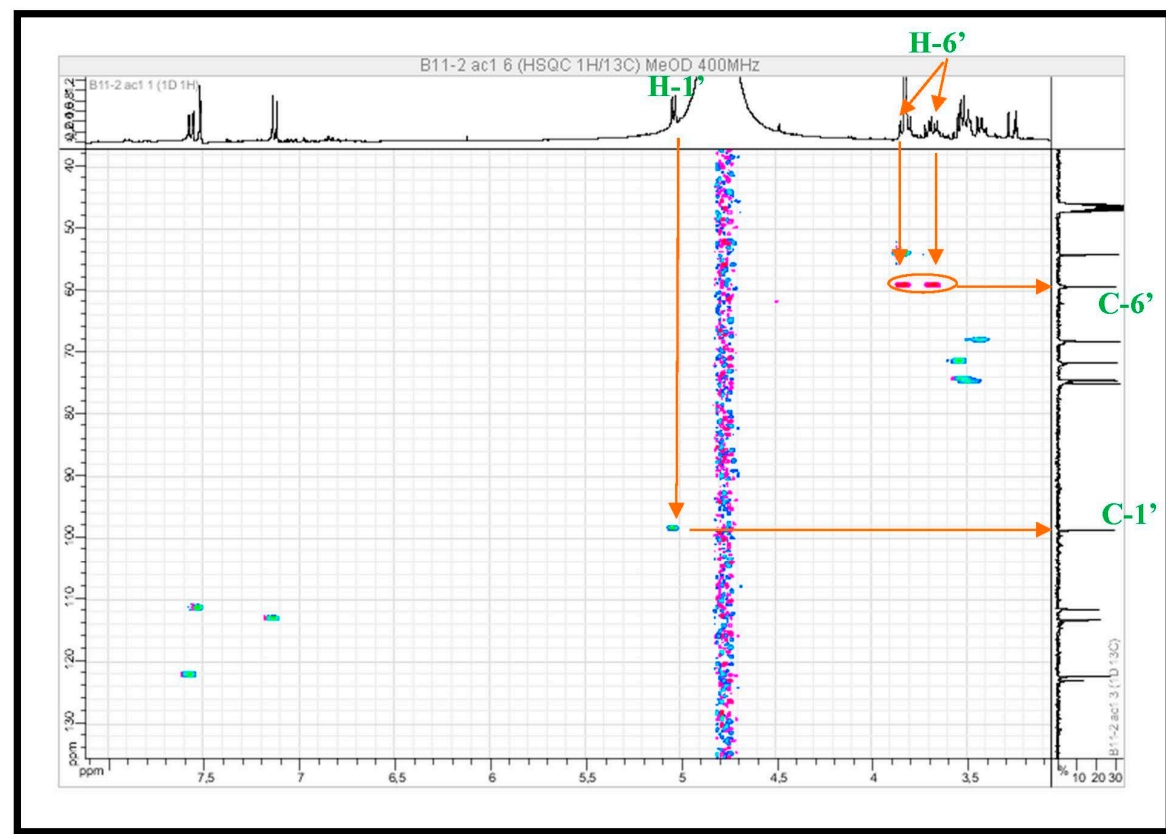

Figure S45. HSQC NMR spectrum (400 MHz,  $\text{CD}_3\text{OD}$ ,  $\delta\text{ppm}$ ) of Vanillic acid 4-O- $\beta$ -D-glucopyranoside.

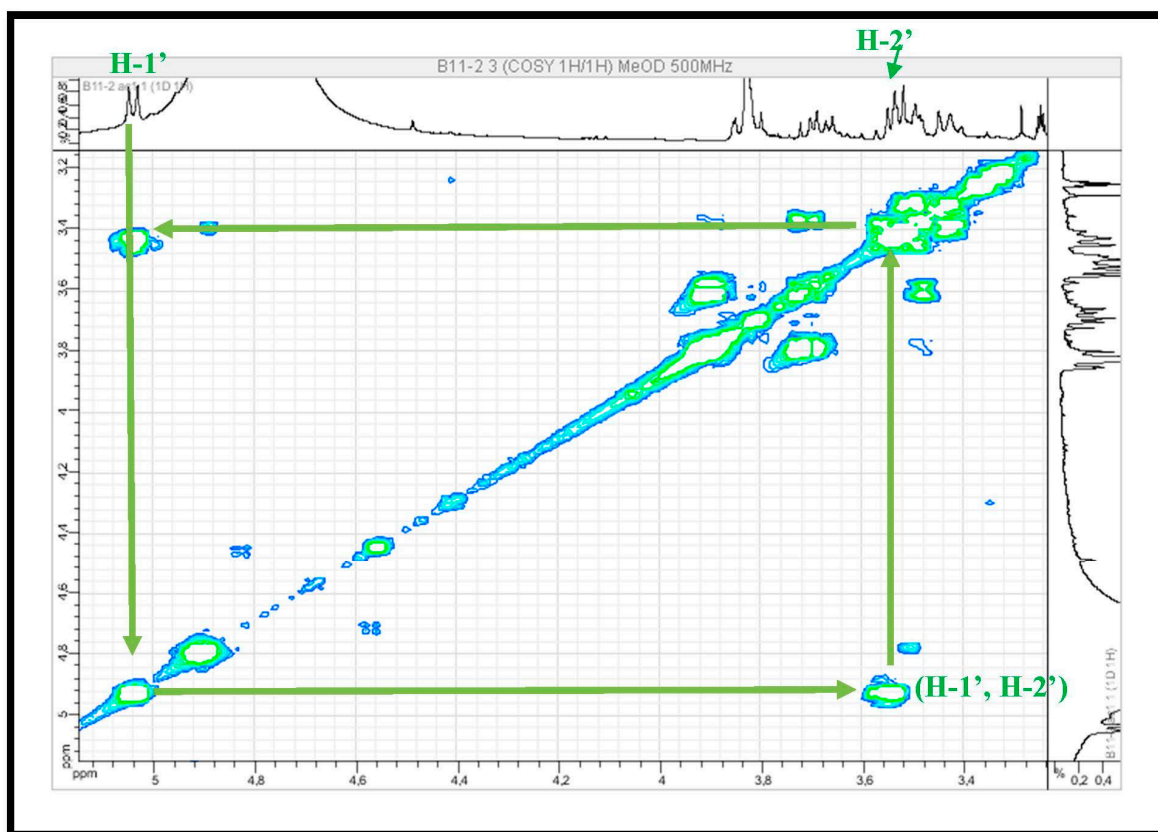

**Figure S46.** COSY NMR spectrum (spreading out 1) (400 MHz, CD<sub>3</sub>OD,  $\delta$ ppm) of Vanillic acid 4-O- $\beta$ -D-glucopyranoside.

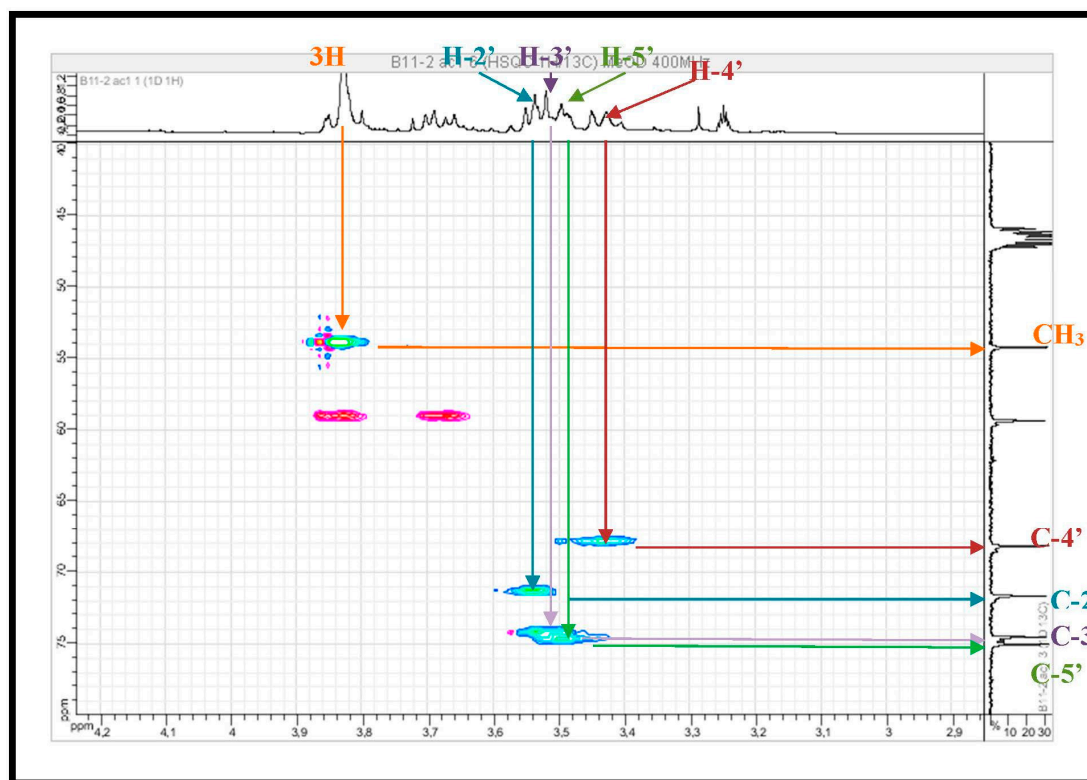

**Figure S47.** HSQC NMR spectrum (spreading out 1) (400 MHz, CD<sub>3</sub>OD,  $\delta$ ppm) of Vanillic acid 4-O- $\beta$ -D-glucopyranoside.

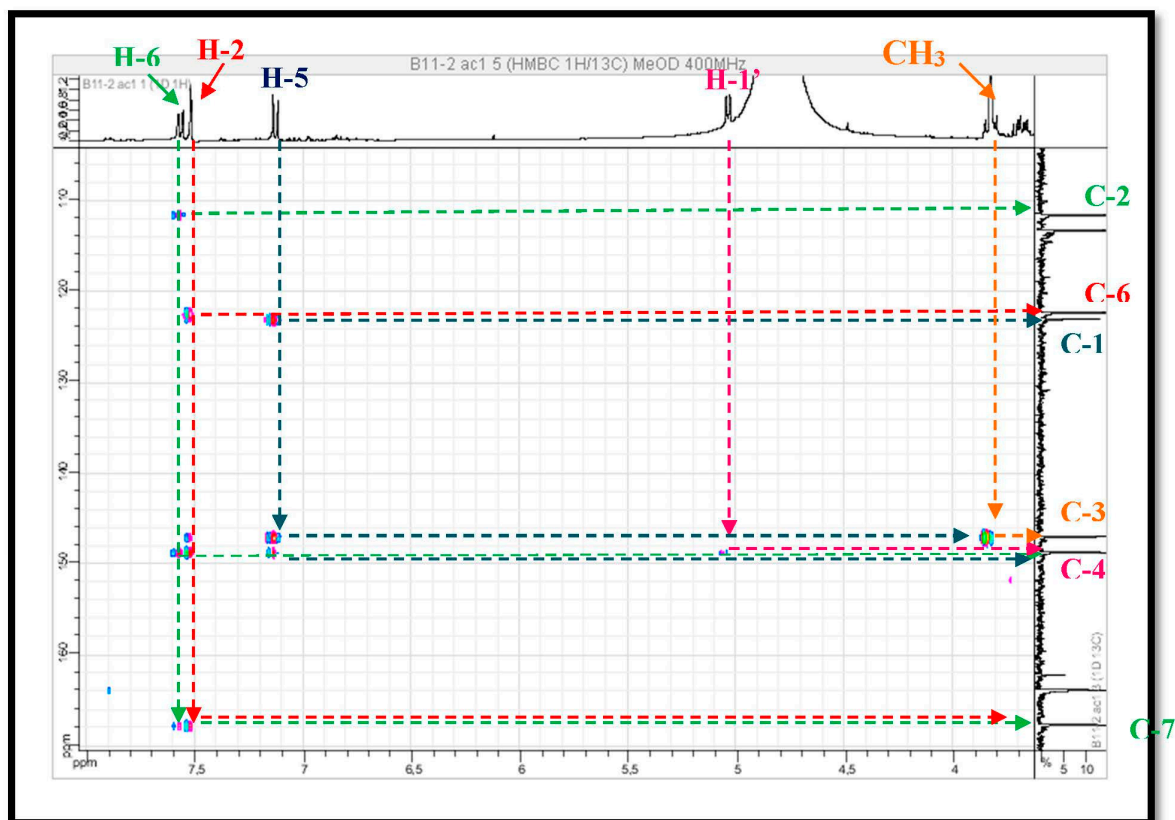

**Figure S48.** HMBC NMR spectrum (spreading out 1) (400 MHz, CD<sub>3</sub>OD, δppm) of Vanillic acid 4-O-β-D-glucopyranoside.

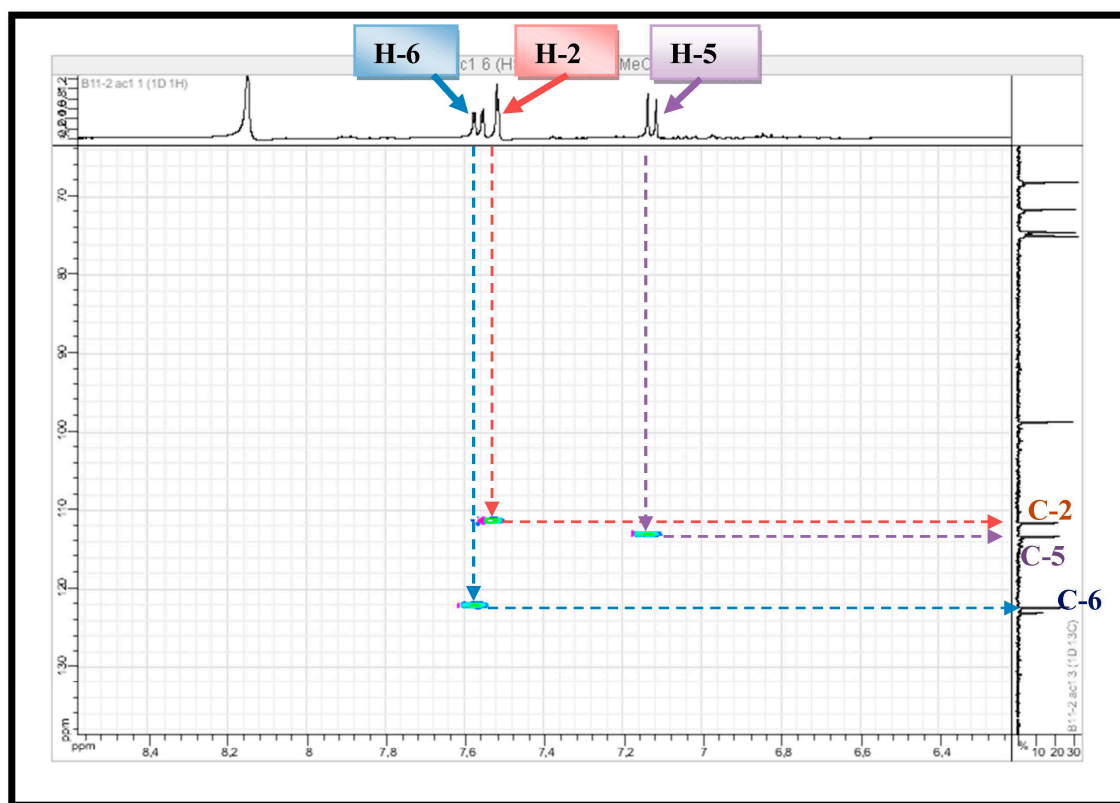

**Figure S49.** HSQC NMR spectrum (spreading out 2) (400 MHz, CD<sub>3</sub>OD, δppm) of Vanillic acid 4-O-β-D-glucopyranoside.

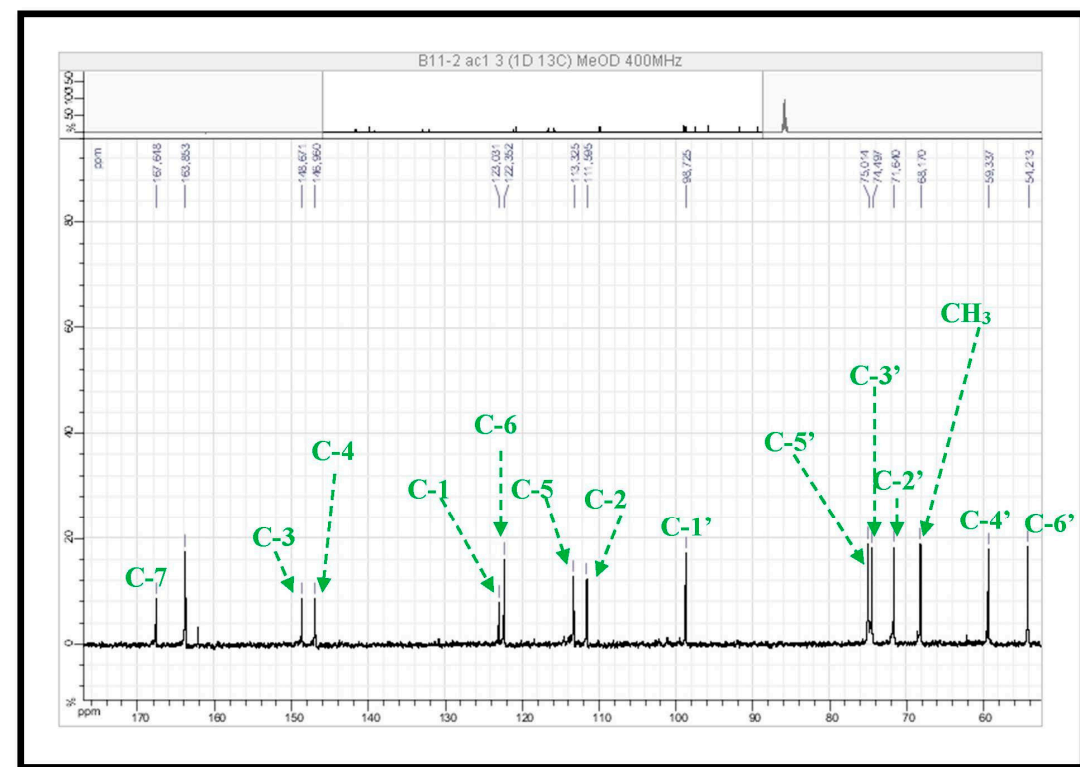

Figure S50. <sup>13</sup>C NMR spectrum (100 MHz, CD<sub>3</sub>OD, δppm) of vanillic acid 4-O-β-D-glucopyranoside.

Molecule 9: Lavandoside

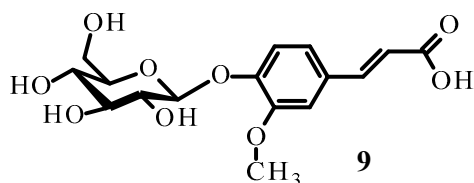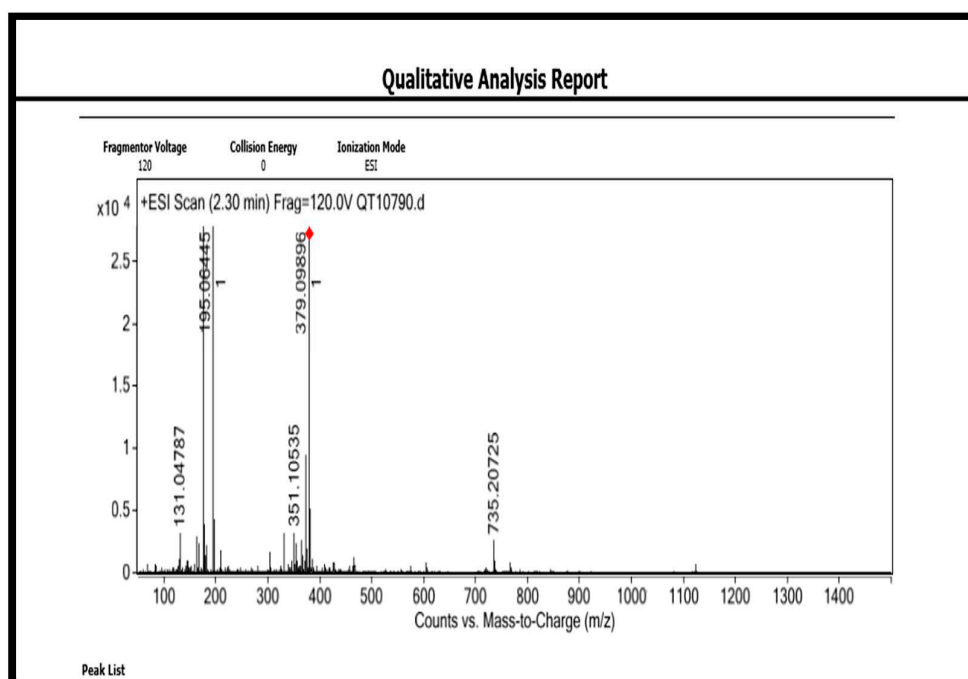

Figure S51. ESI-HRMS(+) of lavandoside.

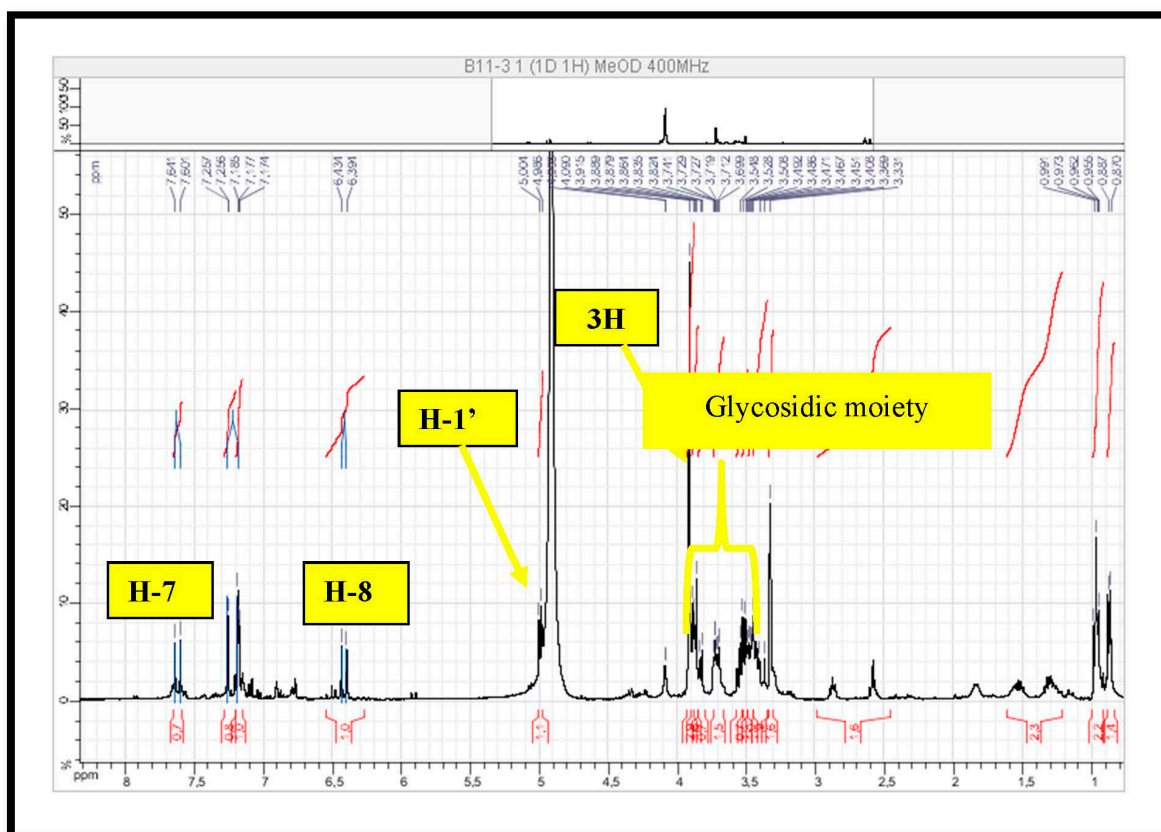

Figure S52.  $^1\text{H}$  NMR spectrum (400 MHz,  $\text{CD}_3\text{OD}$ ,  $\delta\text{ppm}$ ) of lavandoside.

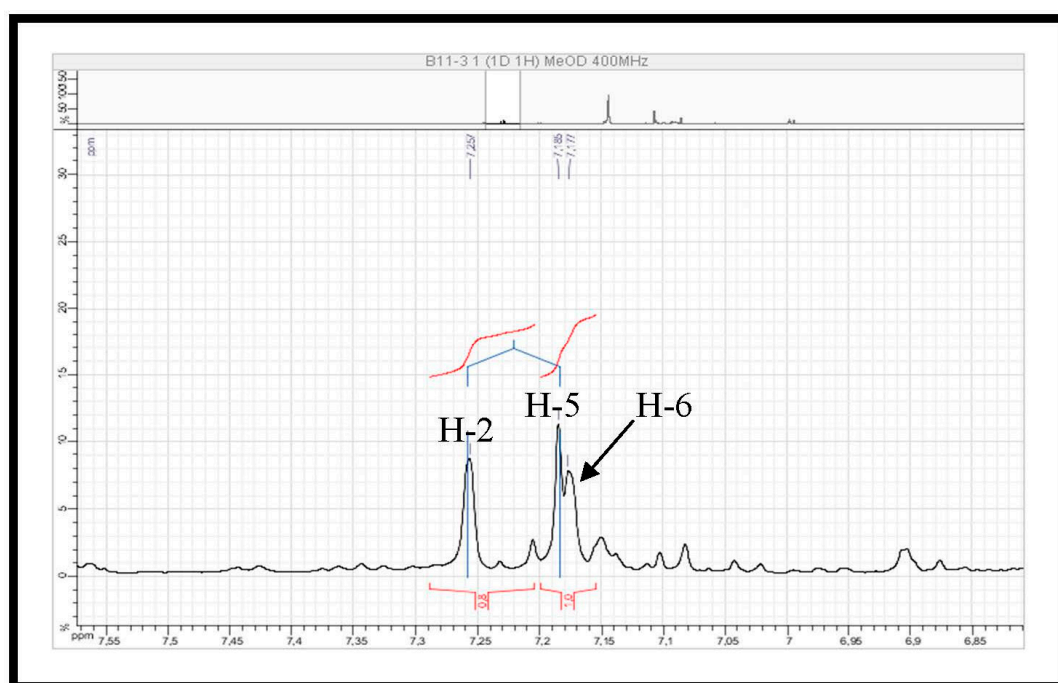

Figure S53.  $^1\text{H}$  NMR spectrum (spreading out 1) (400 MHz,  $\text{CD}_3\text{OD}$ ,  $\delta\text{ppm}$ ) of lavandoside.

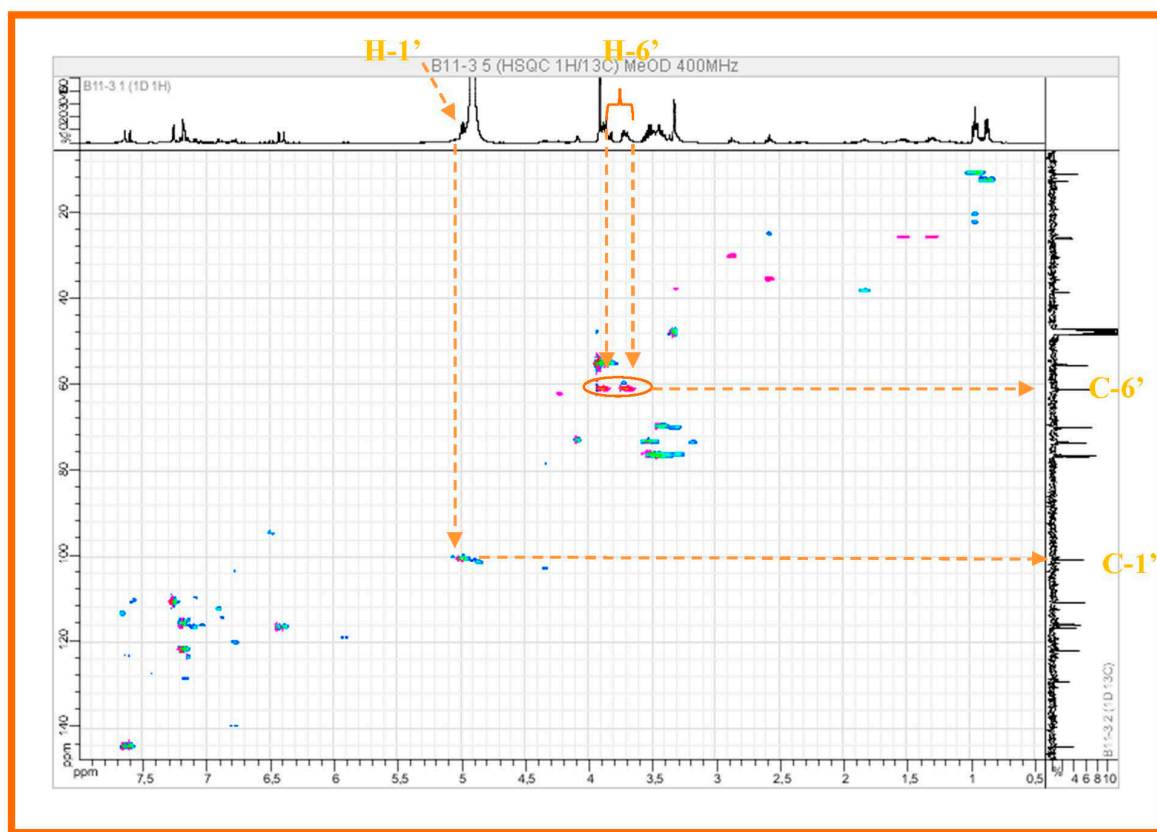

Figure S54. HSQC NMR spectrum (400 MHz,  $\text{CD}_3\text{OD}$ ,  $\delta\text{ppm}$ ) of lavandoside.

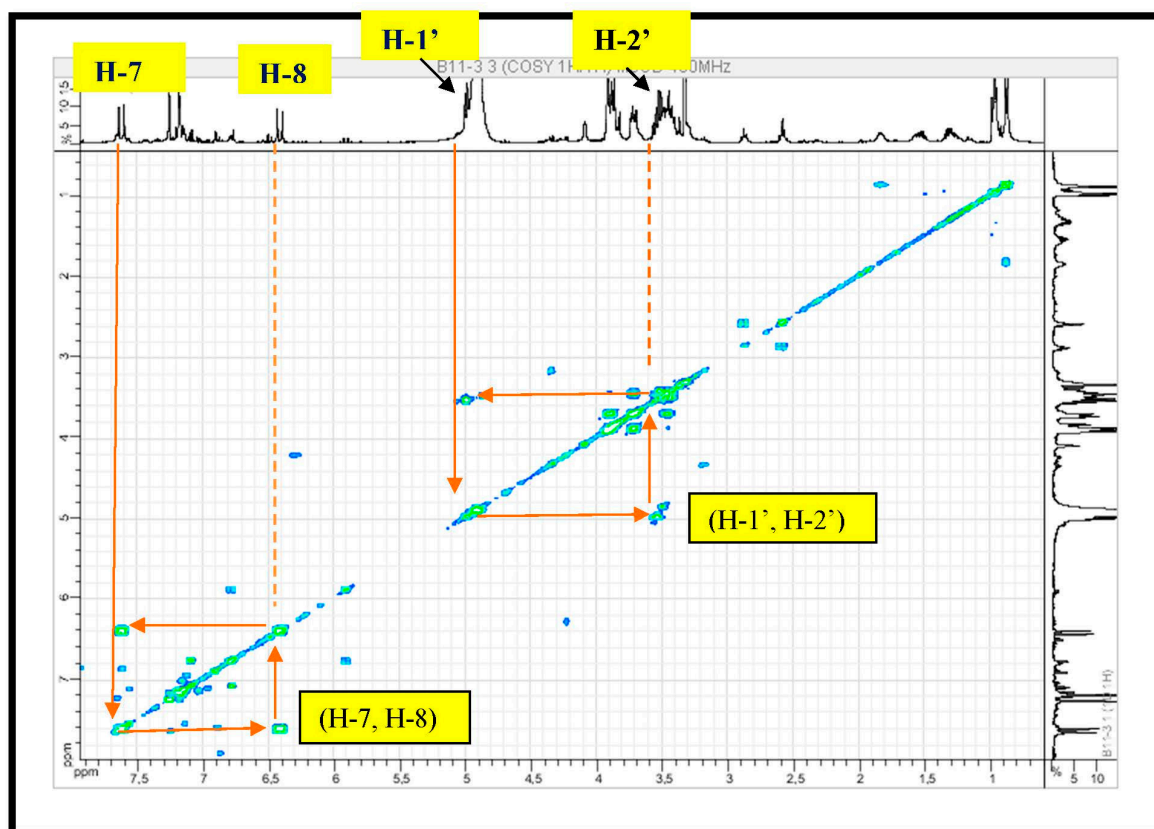

Figure S55. COSY NMR spectrum (400 MHz,  $\text{CD}_3\text{OD}$ ,  $\delta\text{ppm}$ ) of lavandoside.



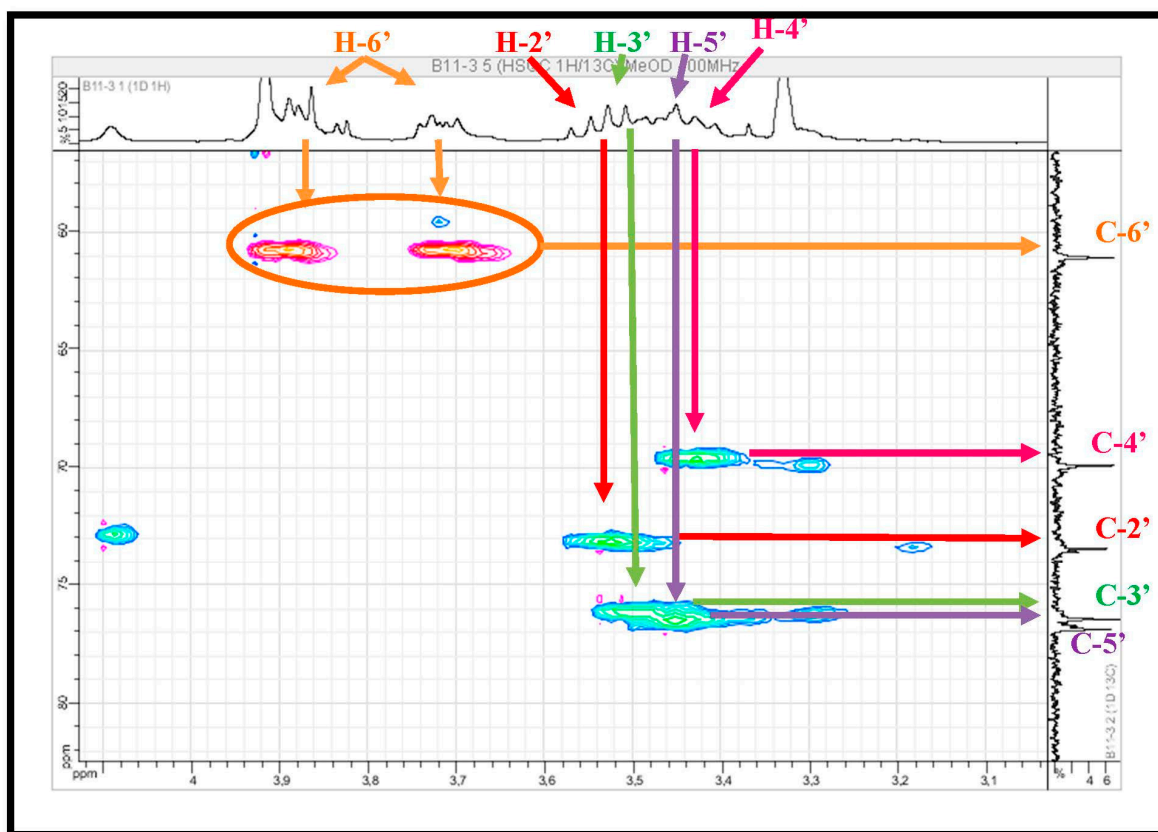

Figure S56. HSQC NMR spectrum (spreading out 1) (400 MHz,  $\text{CD}_3\text{OD}$ ,  $\delta\text{ppm}$ ) of lavandoside.

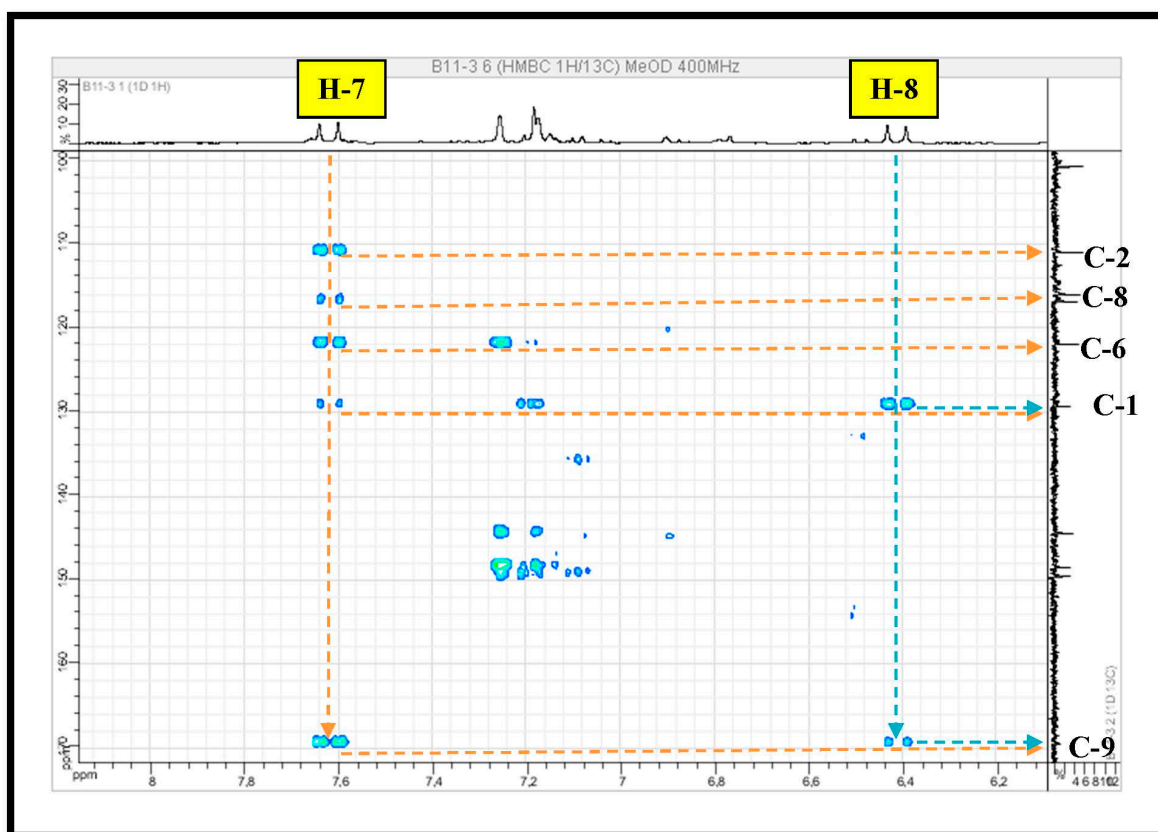

Figure S57. HMBC NMR spectrum (spreading out 1) (400 MHz,  $\text{CD}_3\text{OD}$ ,  $\delta\text{ppm}$ ) of lavandoside.

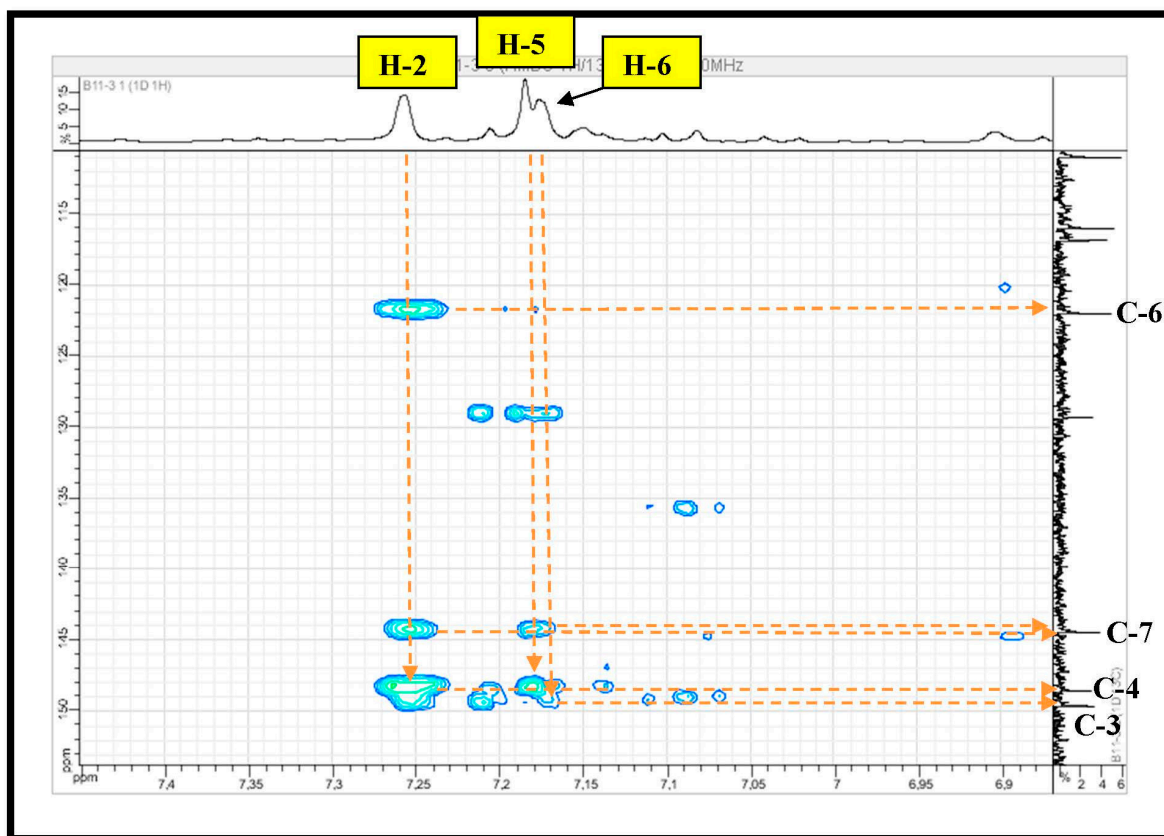

Figure S58. HMBC NMR spectrum (spreading out 2) (400 MHz, CD<sub>3</sub>OD, δppm) of lavandoside.

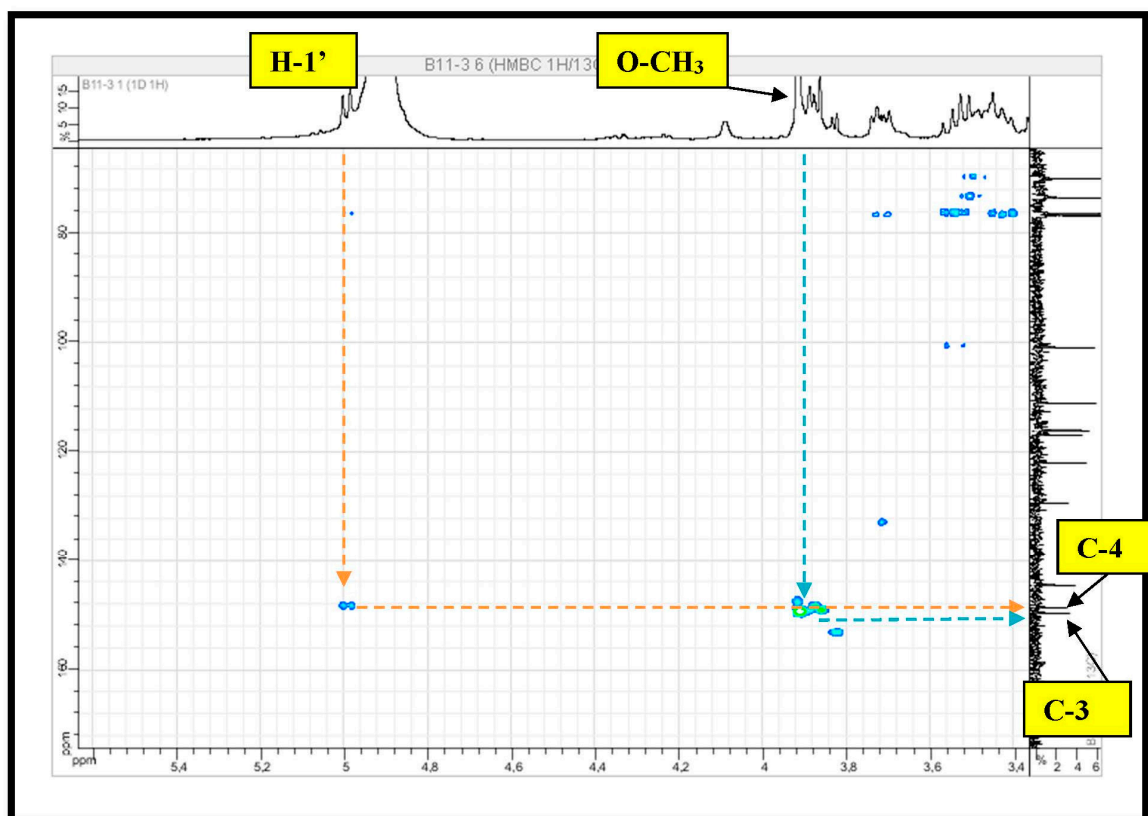

Figure S59. HMBC NMR spectrum (spreading out 3) (400 MHz, CD<sub>3</sub>OD, δppm) of lavandoside.

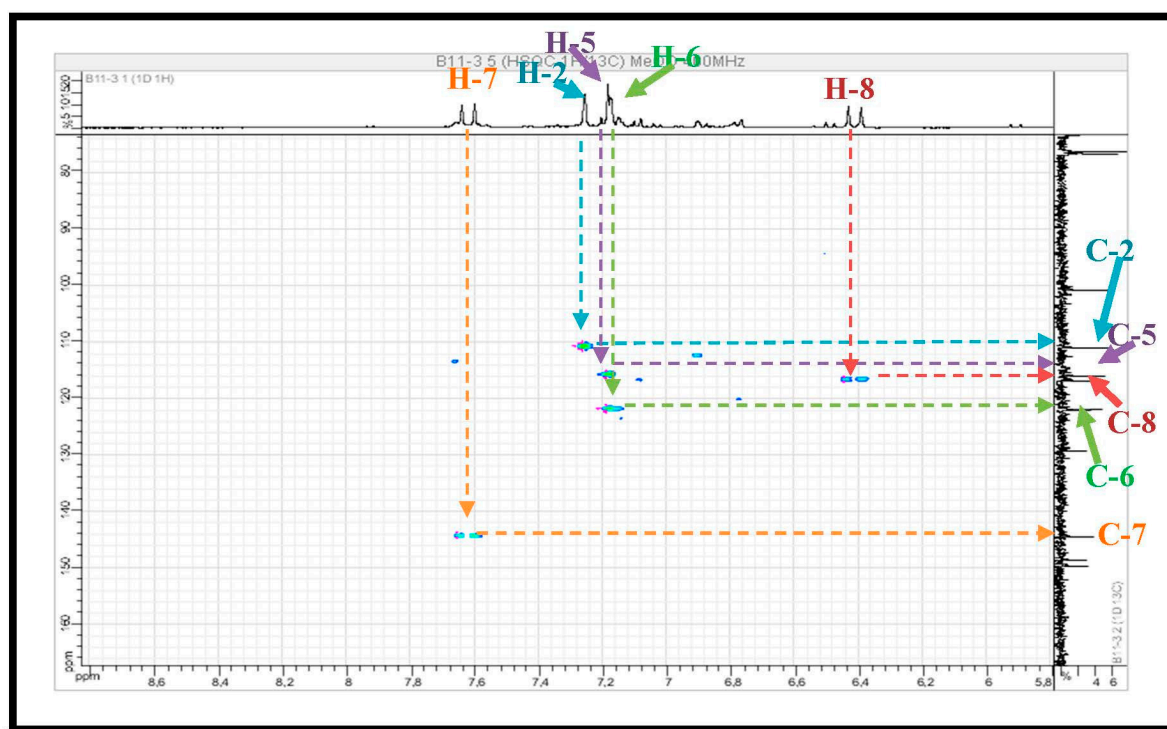

Figure S60. HSQC NMR spectrum (spreading out 2) (400 MHz,  $\text{CD}_3\text{OD}$ ,  $\delta\text{ppm}$ ) of lavandoside.

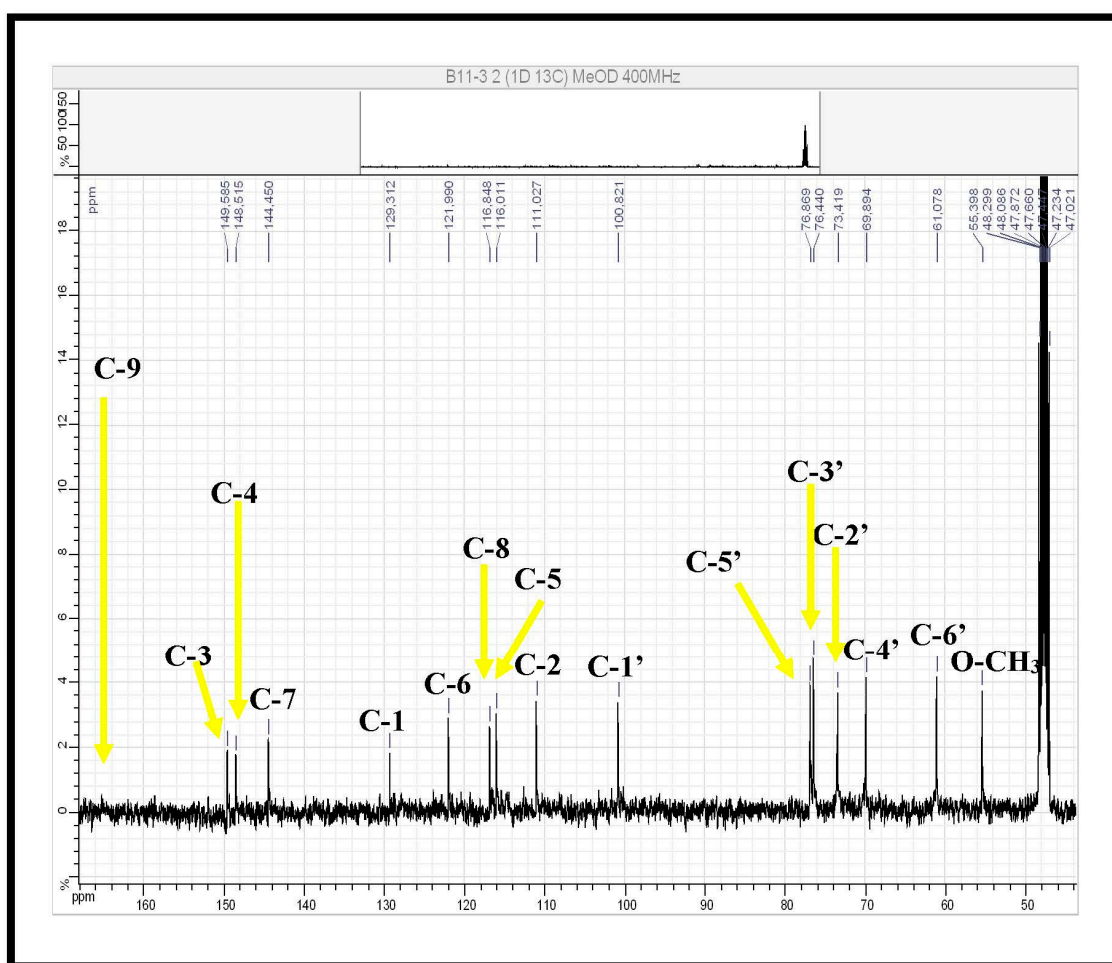

Figure S61.  $^{13}\text{C}$  NMR spectrum (100 MHz,  $\text{CD}_3\text{OD}$ ,  $\delta\text{ppm}$ ) of lavandoside.

**Molecule 10:** 4-Hydroxybenzoic acid 4-O- $\beta$ -D-glucopyranoside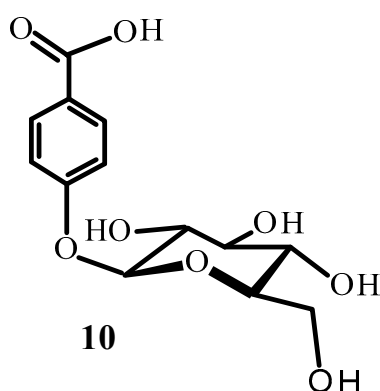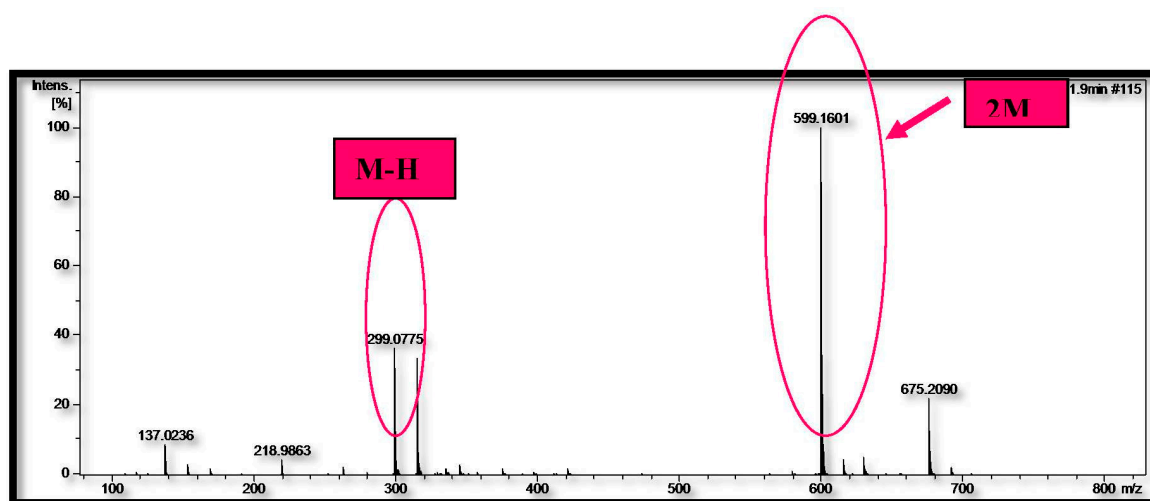

Min

Max

Note: for m < 2000 the elements C, H, N, and O are considered implicitly.

Measured m/z  Tolerance  mDa  Charge

| Meas. m/z | # | Formula                                         | mSigma | m/z      | err [mDa] | err [ppm] | rdb  | e              |
|-----------|---|-------------------------------------------------|--------|----------|-----------|-----------|------|----------------|
| 599.1601  | 1 | C <sub>26</sub> H <sub>31</sub> O <sub>16</sub> | 9.0    | 599.1618 | 1.6       | 2.7       | 11.5 | e <sup>-</sup> |
|           | 3 | C <sub>37</sub> H <sub>25</sub> O <sub>8</sub>  | 714.4  | 597.1555 | 3.9       | -6.5      | 25.5 | e <sup>-</sup> |
|           | 2 | C <sub>19</sub> H <sub>33</sub> O <sub>21</sub> | 704.6  | 597.1520 | -7.4      | -12.4     | 3.5  | e <sup>-</sup> |
|           | 4 | C <sub>44</sub> H <sub>21</sub> O <sub>3</sub>  | 718.6  | 597.1496 | -9.8      | -16.4     | 34.5 | e <sup>-</sup> |

**Figure S62.** ESI-HRMS(-) of 4-hydroxybenzoic acid 4-O- $\beta$ -D-glucopyranoside.

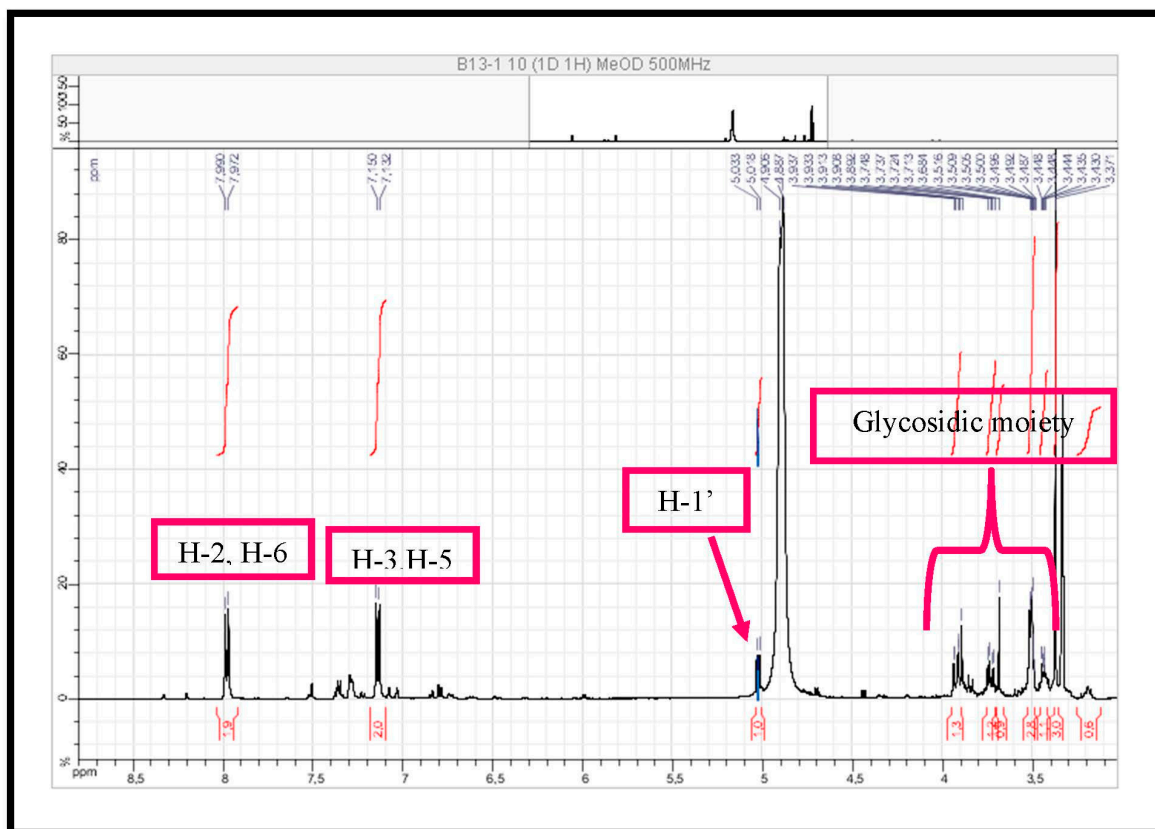

Figure S63. <sup>1</sup>H NMR spectrum (500 MHz, CD<sub>3</sub>OD, δppm) of 4-hydroxybenzoic acid 4-O-β-D-glucopyranoside.

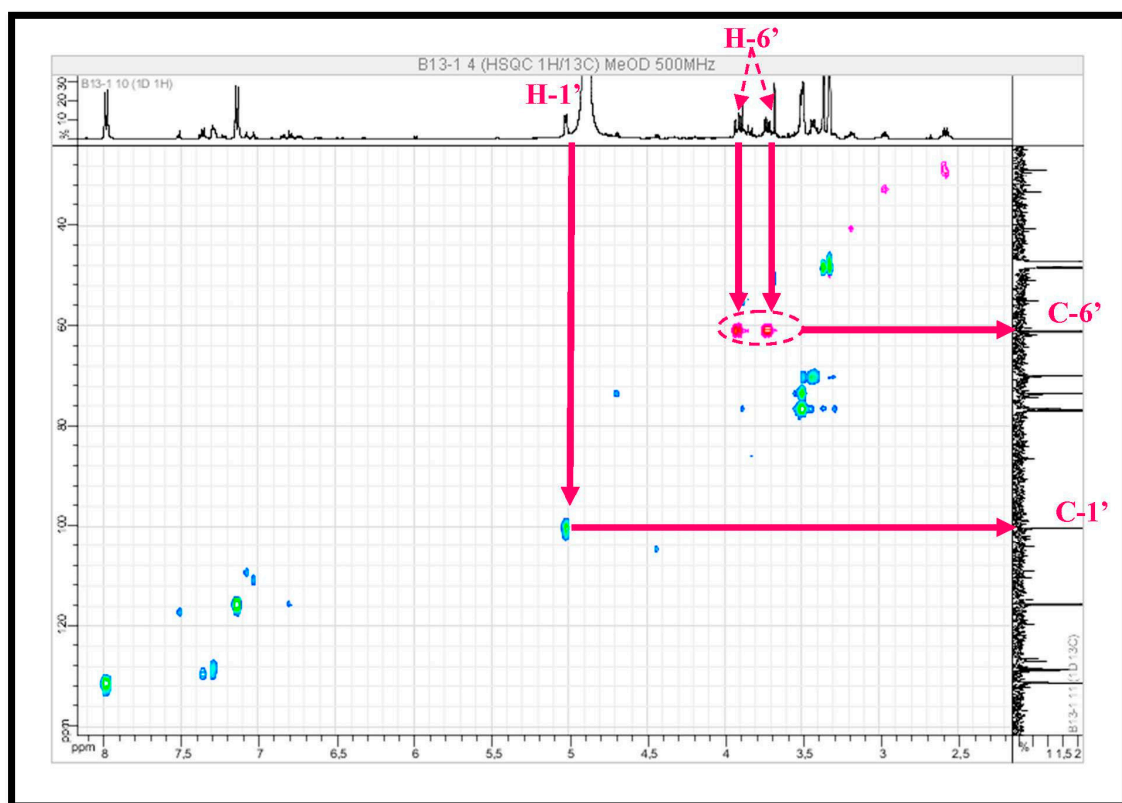

Figure S64. HSQC NMR spectrum (500 MHz, CD<sub>3</sub>OD, δppm) of 4-hydroxybenzoic acid 4-O-β-D-glucopyranoside.

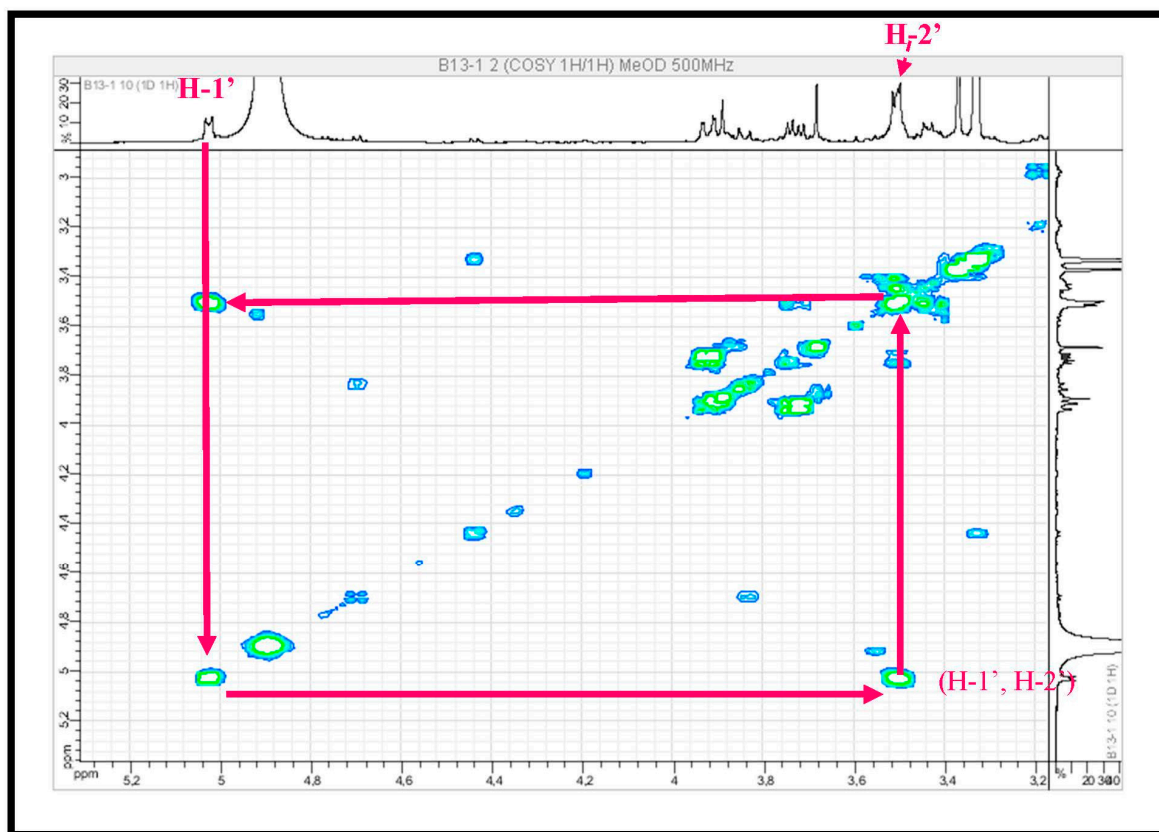

**Figure S65.** COSY NMR spectrum (spreading out 1) (500 MHz, CD<sub>3</sub>OD, δppm) of 4-hydroxybenzoic acid 4-O-β-D-glucopyranoside.

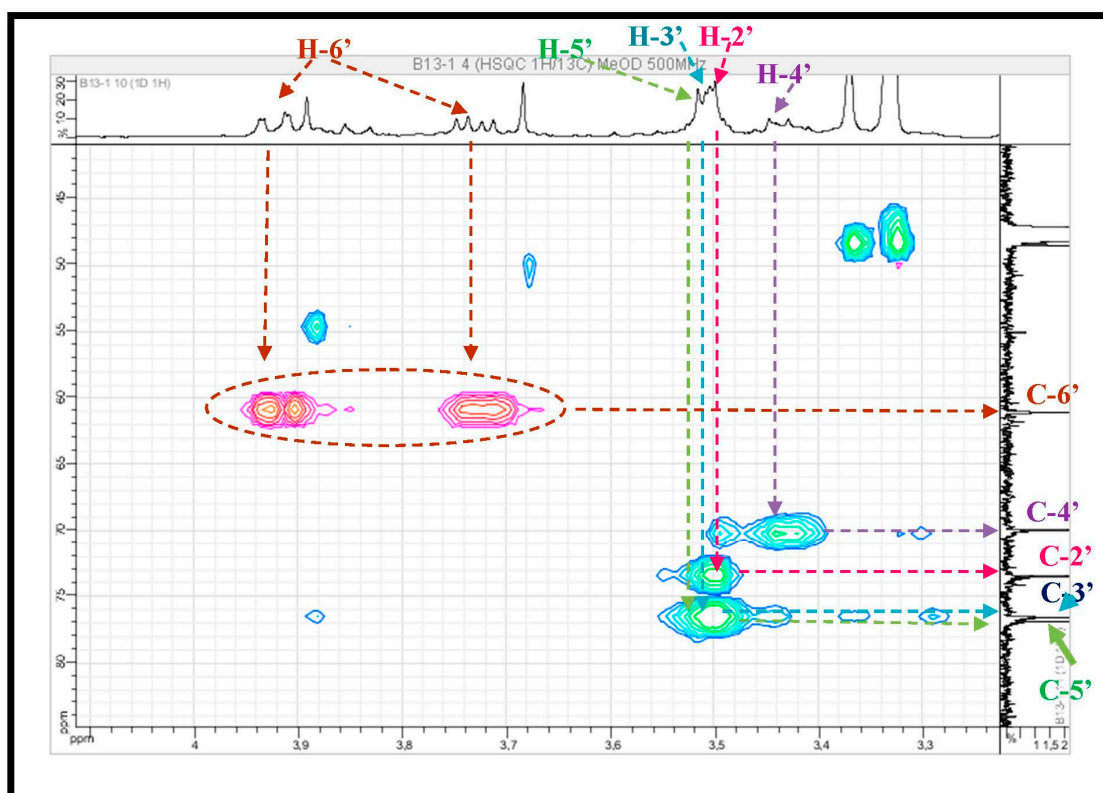

**Figure S66.** HSQC NMR spectrum (spreading out 1) (500 MHz, CD<sub>3</sub>OD, δppm) of 4-hydroxybenzoic acid 4-O-β-D-glucopyranoside.

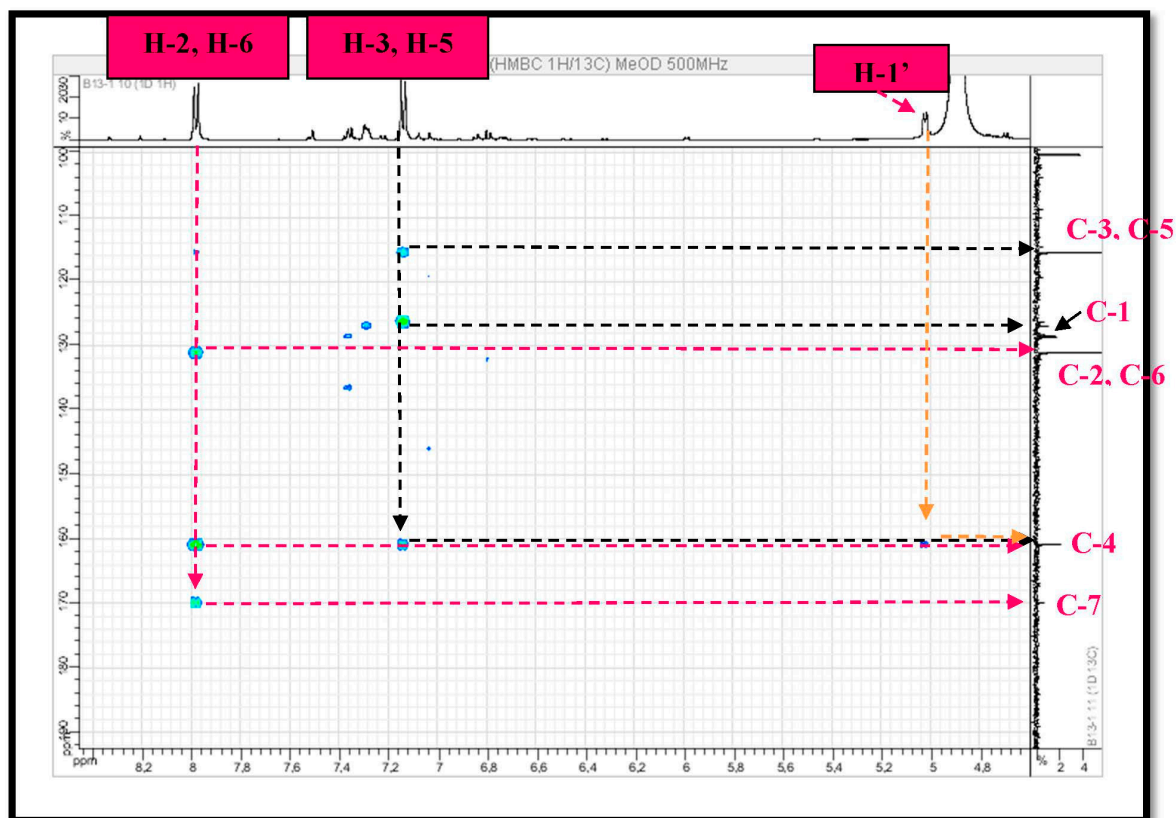

**Figure S67.** HMBCNMR spectrum (spreading out 1) (500 MHz, CD<sub>3</sub>OD, δppm) of 4-hydroxybenzoic acid 4-O-β-D-glucopyranoside.

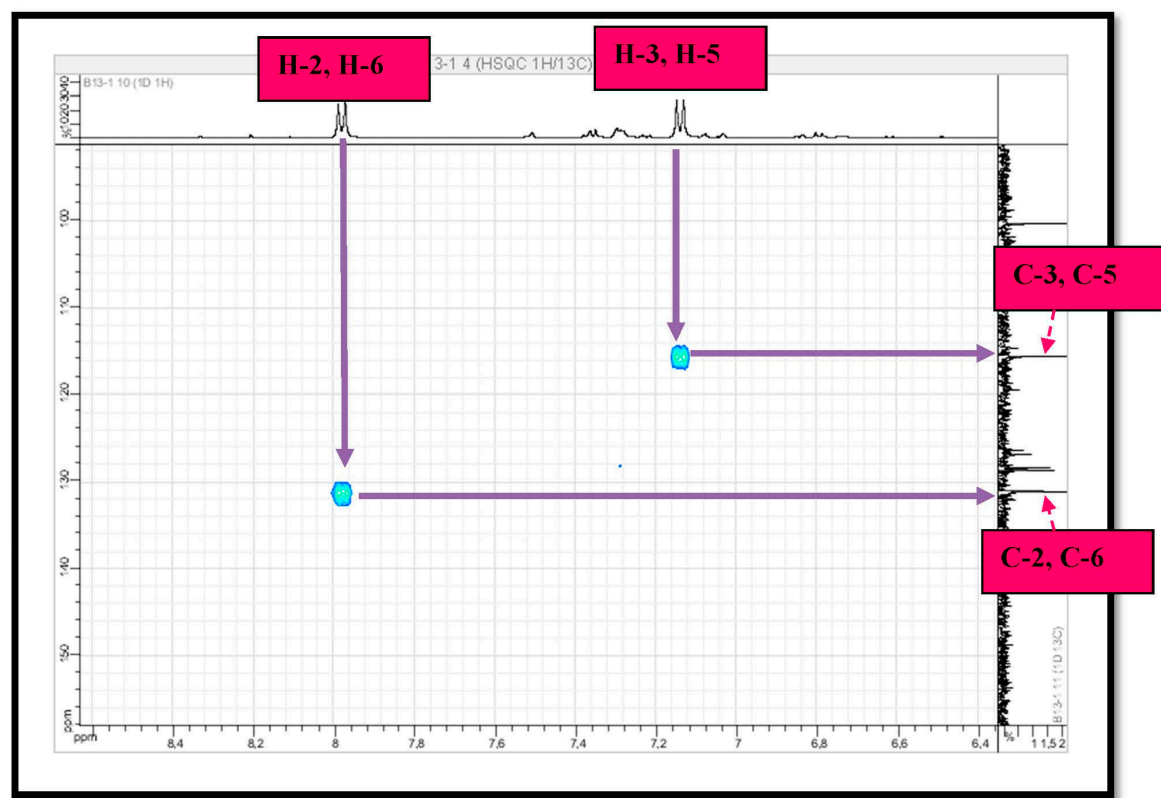

**Figure S68.** HSQC NMR spectrum (spreading out 2) (500 MHz, CD<sub>3</sub>OD, δppm) of 4-hydroxybenzoic acid 4-O-β-D-glucopyranoside.

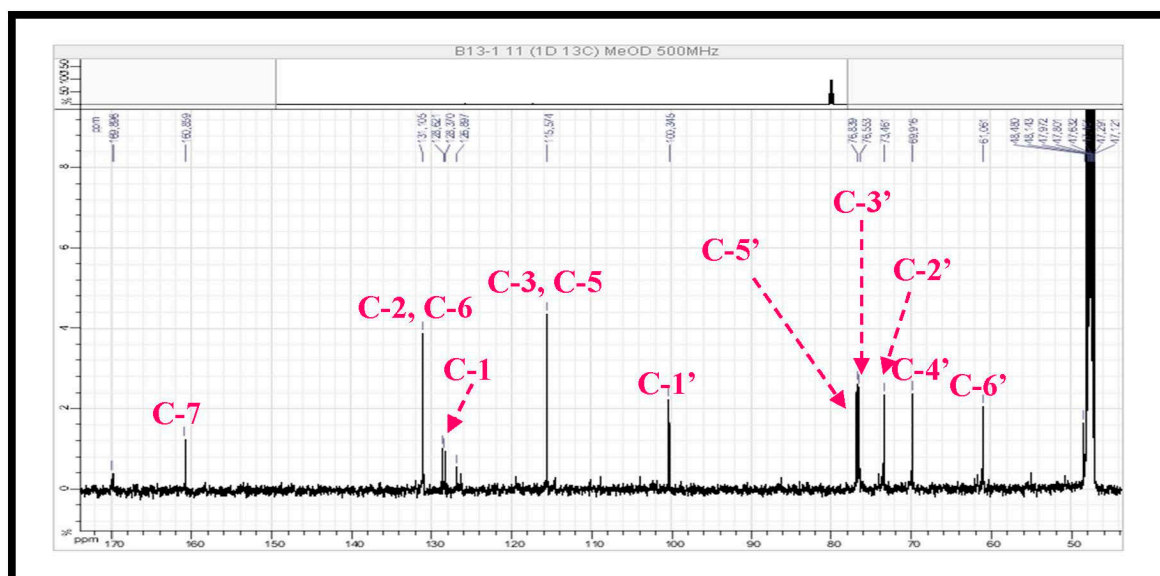

**Figure S69.** HSQC NMR spectrum (125 MHz, CD<sub>3</sub>OD, δppm) of 4-hydroxybenzoic acid 4-O-β-D-glucopyranoside.

#### Molecule 11: Nicotiflorin

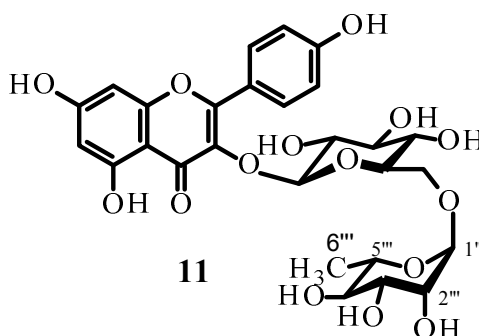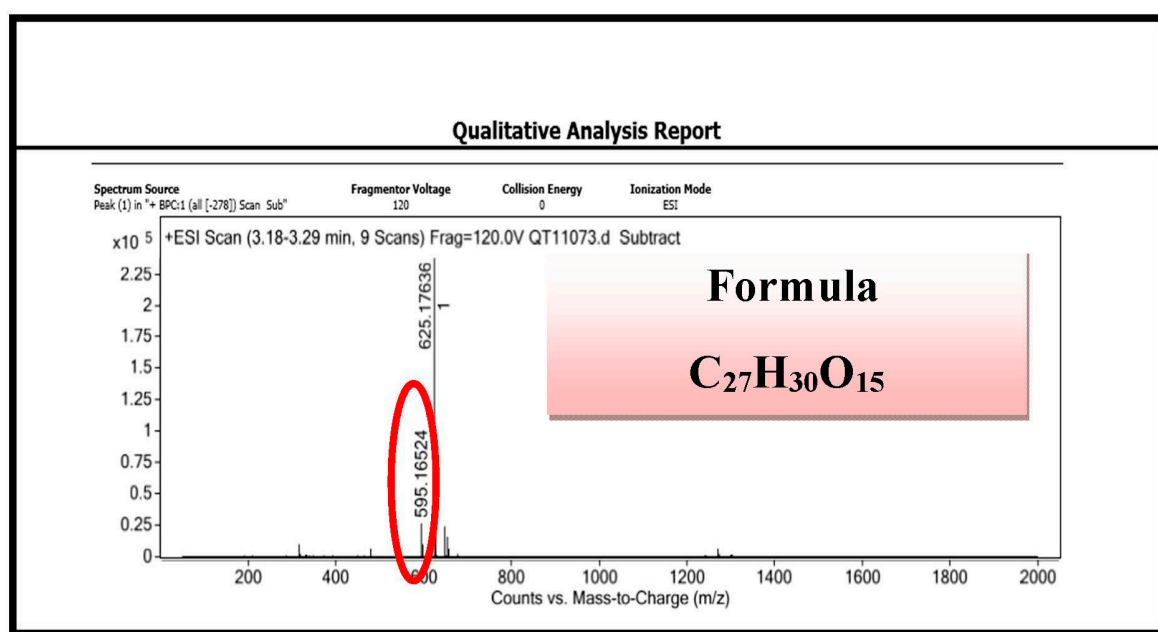

**Figure S70.** ESI-HRMS(+) of nicotiflorin.



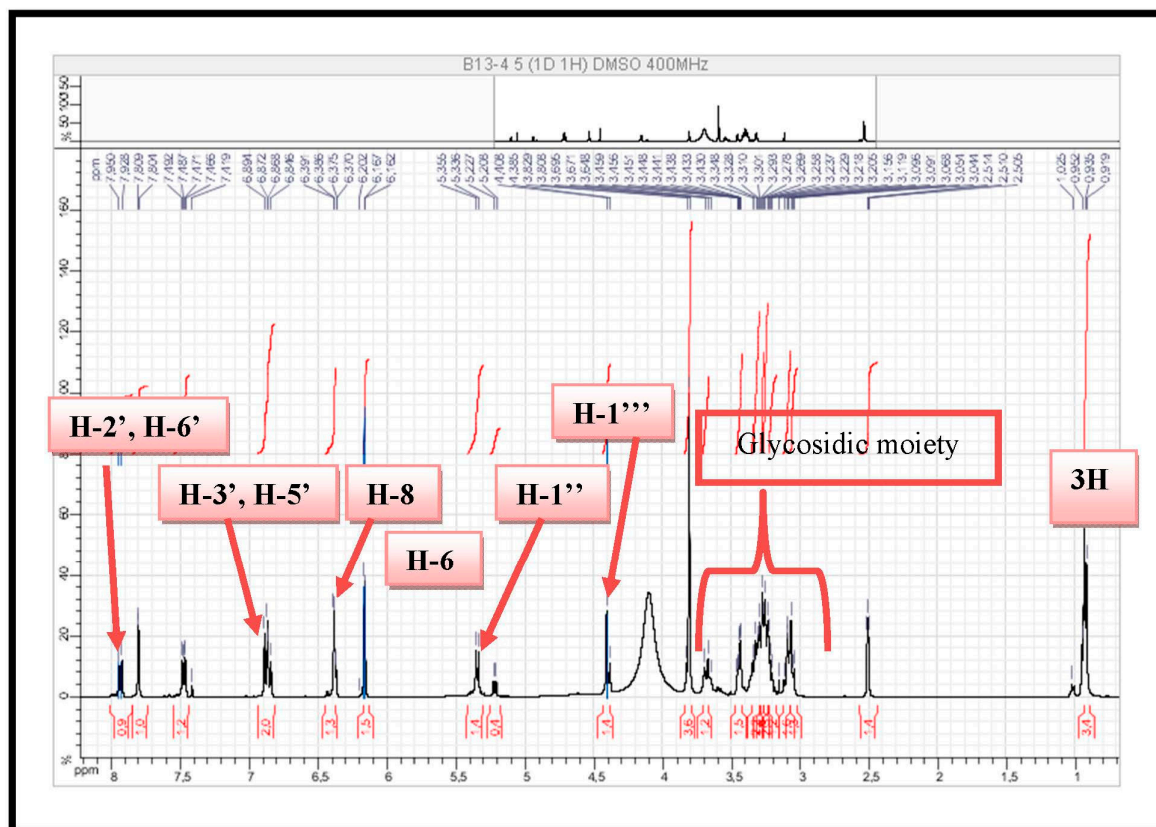

Figure S71.  $^1\text{H}$  NMR spectrum (400 MHz,  $\text{DMSO-}d_6$ ,  $\delta\text{ppm}$ ) of nicotiflorin.

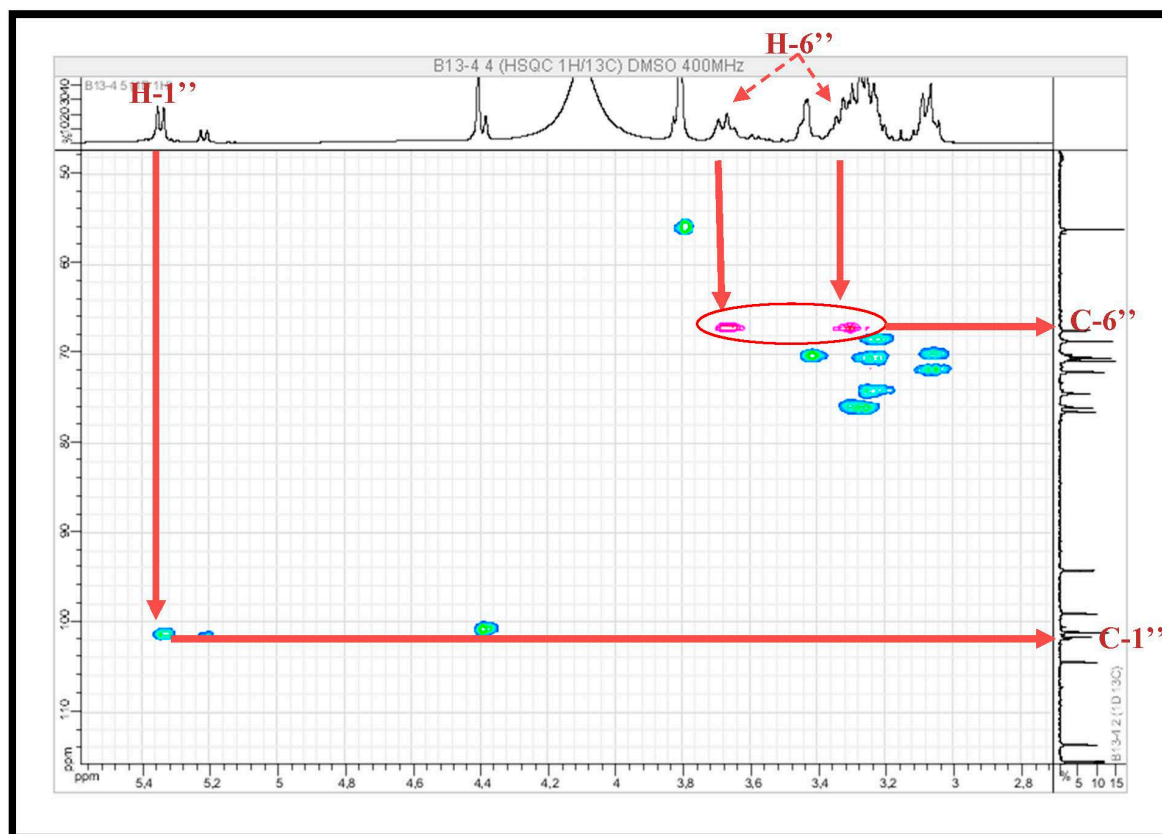

Figure S72. HSQC NMR spectrum (spreading out 1) (400 MHz,  $\text{DMSO-}d_6$ ,  $\delta\text{ppm}$ ) of nicotiflorin.

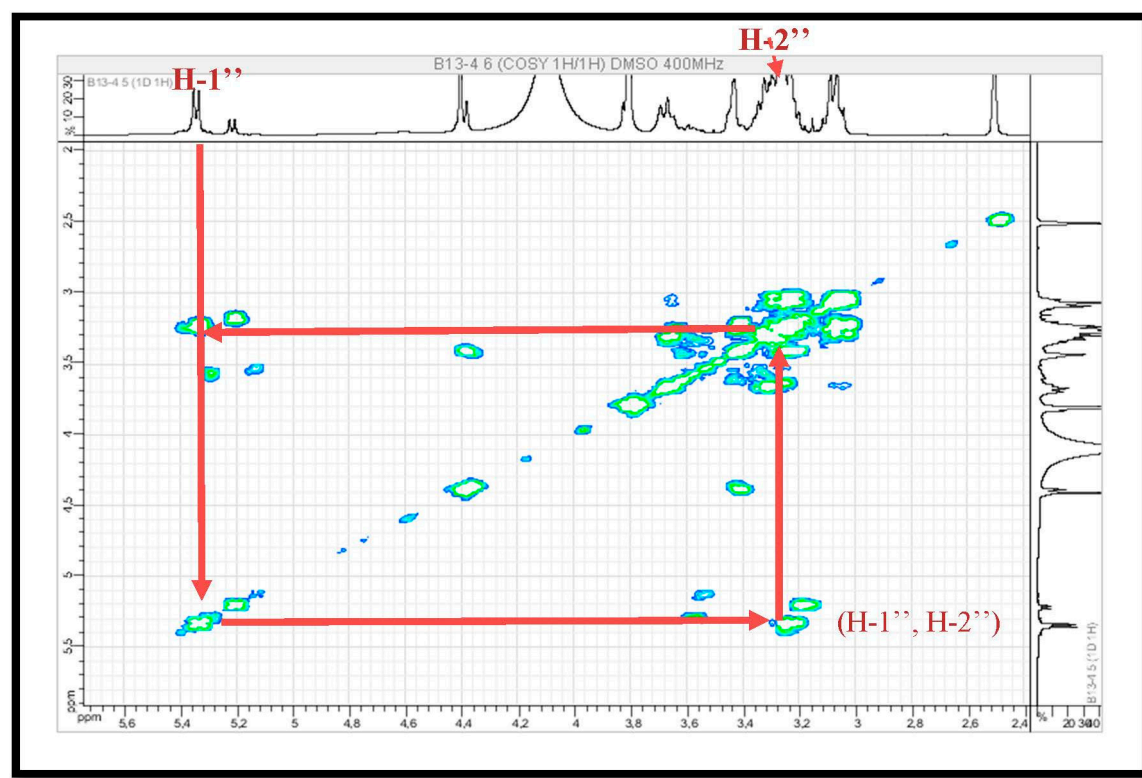

Figure S73. COSY NMR spectrum (spreading out 1) (400 MHz, DMSO- $d_6$ ,  $\delta$ ppm) of nicotiflorin.

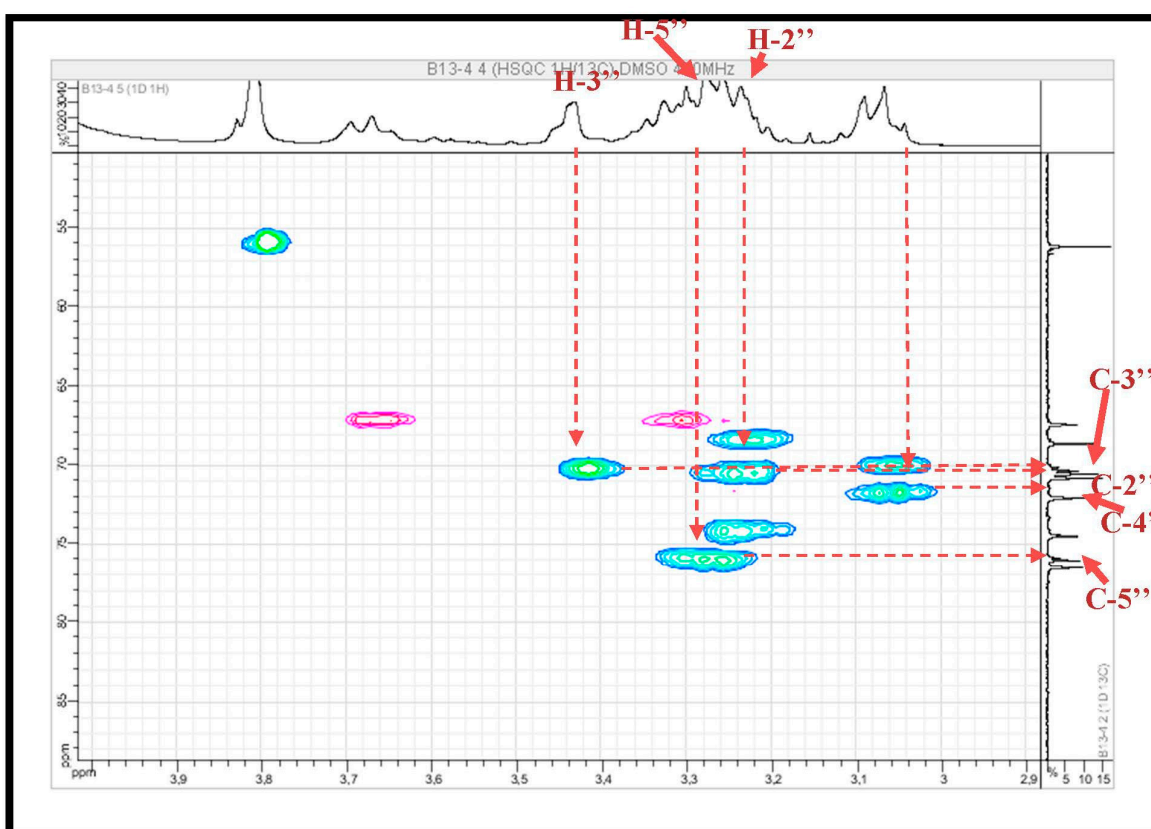

Figure S74. HSQC NMR spectrum (spreading out 2) (400 MHz, DMSO- $d_6$ ,  $\delta$ ppm) of nicotiflorin.

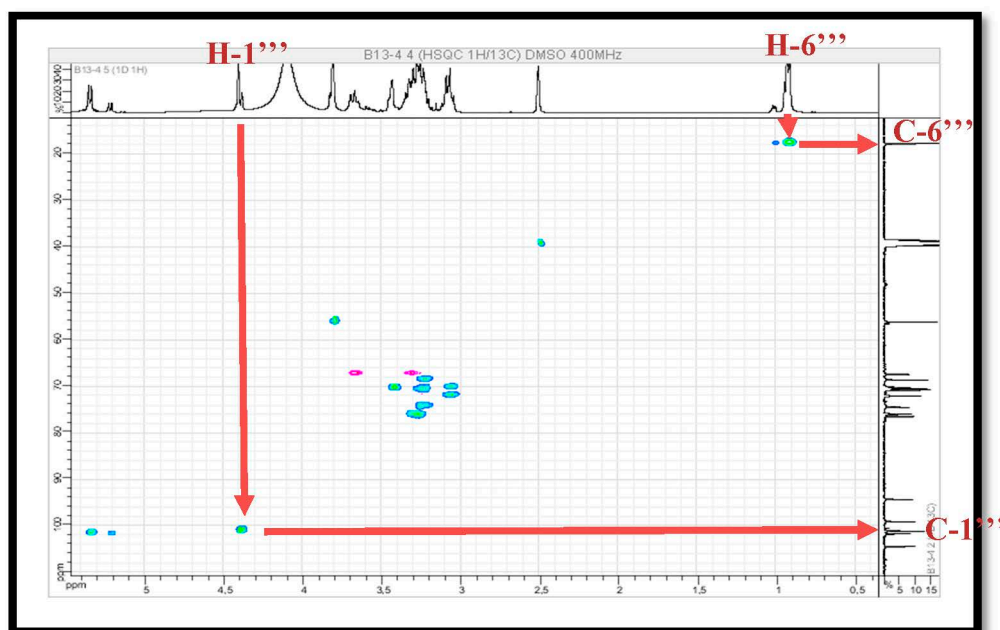

Figure S75. HSQC NMR spectrum (spreading out 3) (400 MHz, DMSO-*d*<sub>6</sub>, δppm) of nicotiflorin.

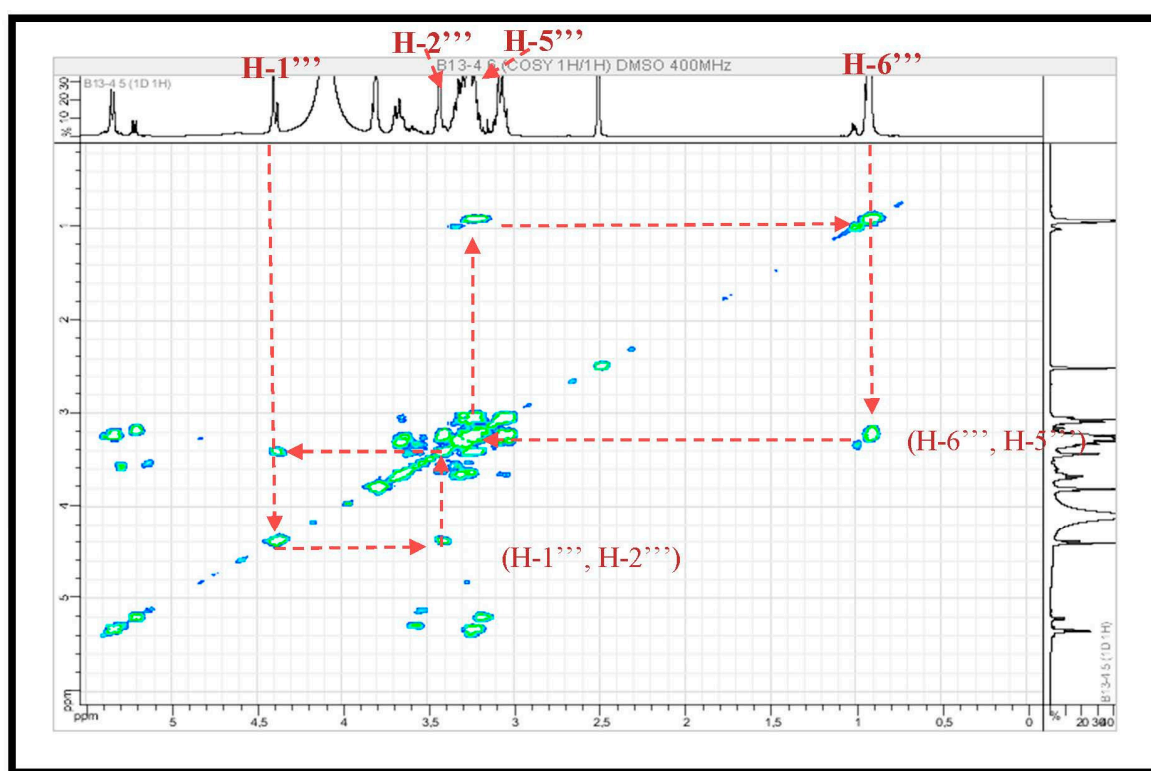

Figure S76. COSY NMR spectrum (spreading out 2) (400 MHz, DMSO-*d*<sub>6</sub>, δppm) of nicotiflorin.

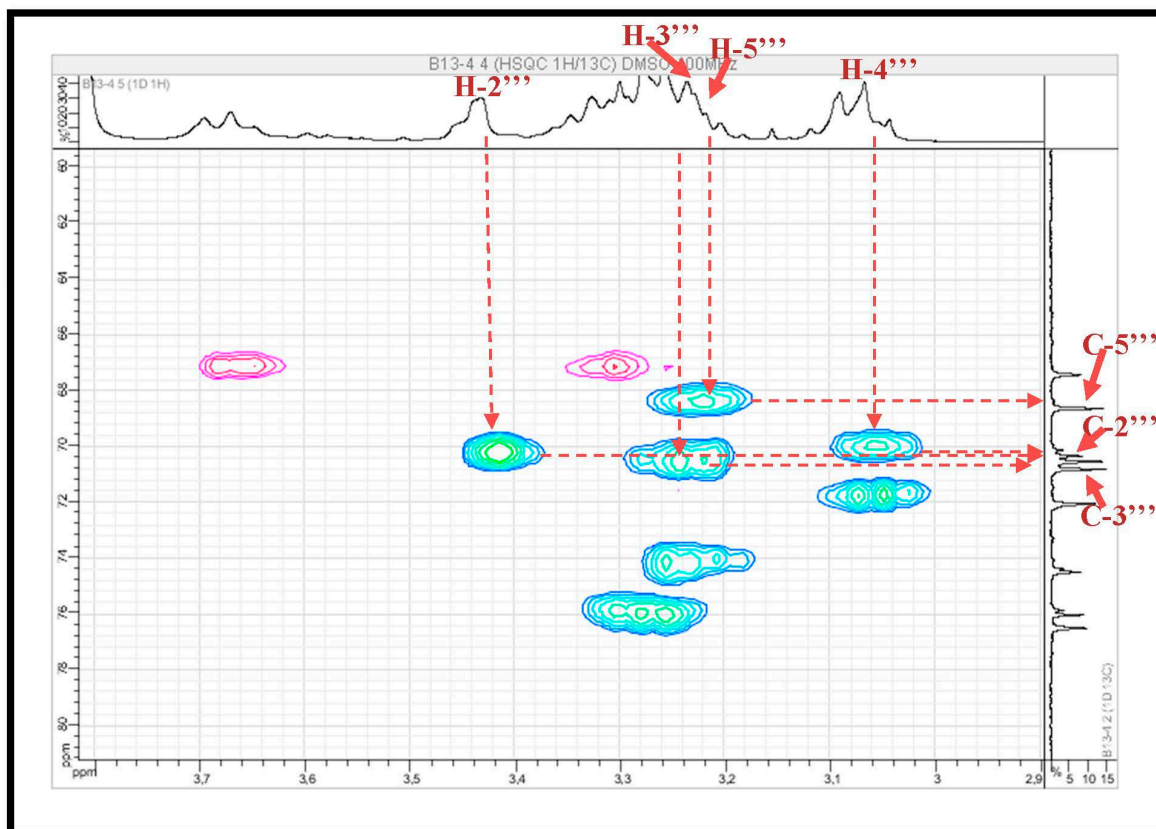

Figure S77. HSQC NMR spectrum (spreading out 4) (400 MHz, DMSO-*d*<sub>6</sub>, δppm) of nicotiflorin.

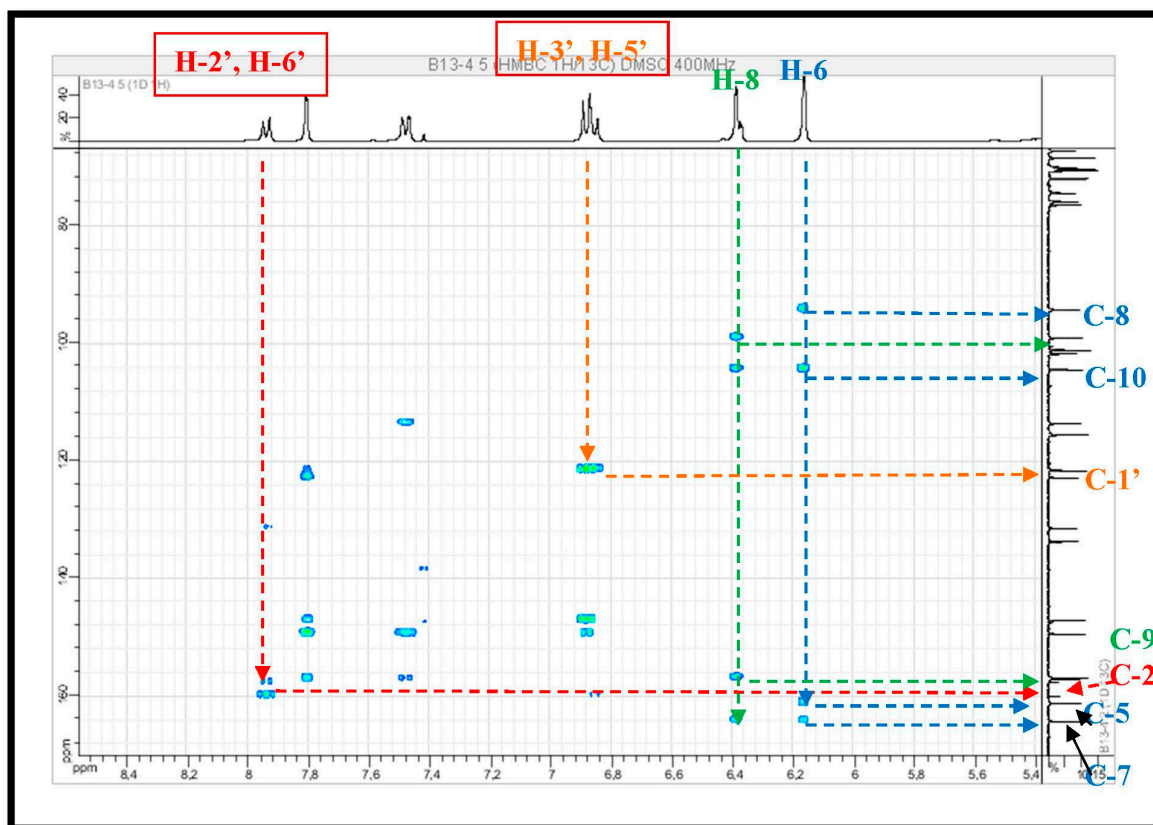

Figure S78. HMBC NMR spectrum (400 MHz, DMSO-*d*<sub>6</sub>, δppm) of nicotiflorin.

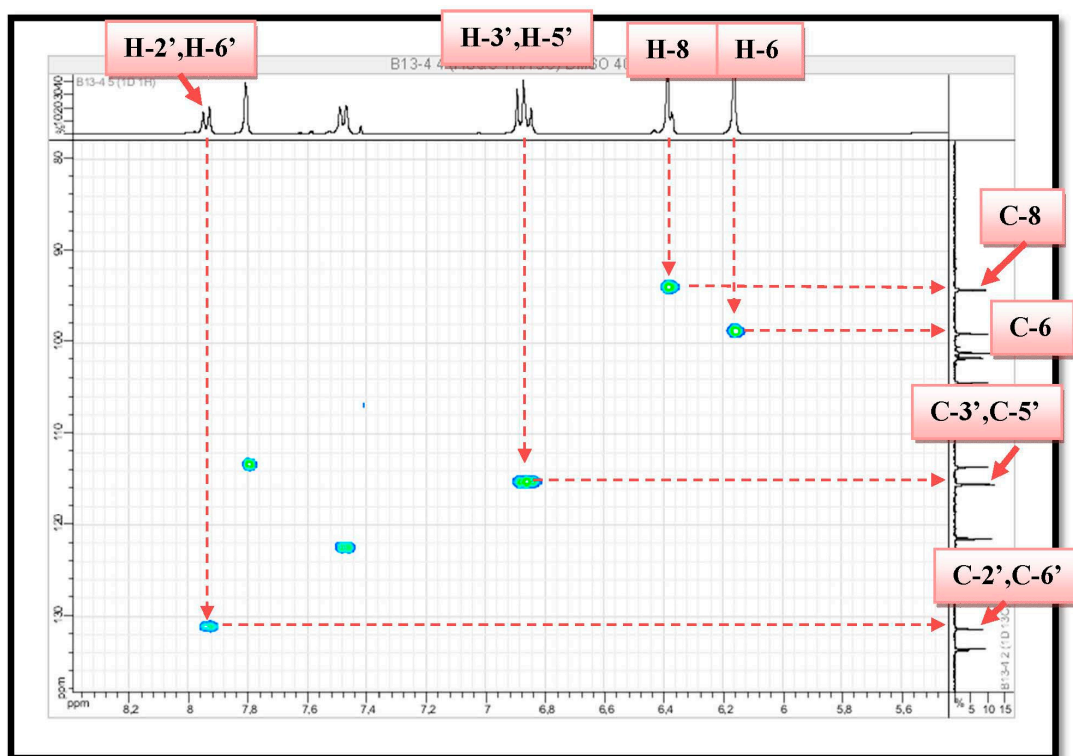

Figure S79. HSQC NMR spectrum (spreading out 5) (400 MHz, DMSO-*d*<sub>6</sub>, δppm) of nicotiflorin.

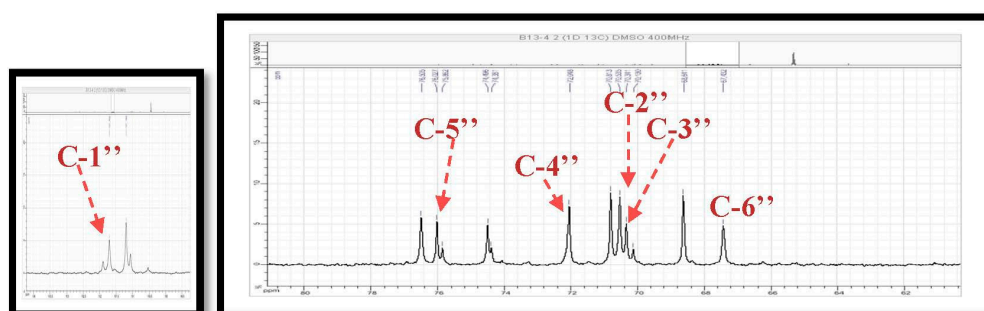

Figure S80. <sup>13</sup>C NMR spectrum (spreading out 1) (100 MHz, DMSO-*d*<sub>6</sub>, δppm) of nicotiflorin.

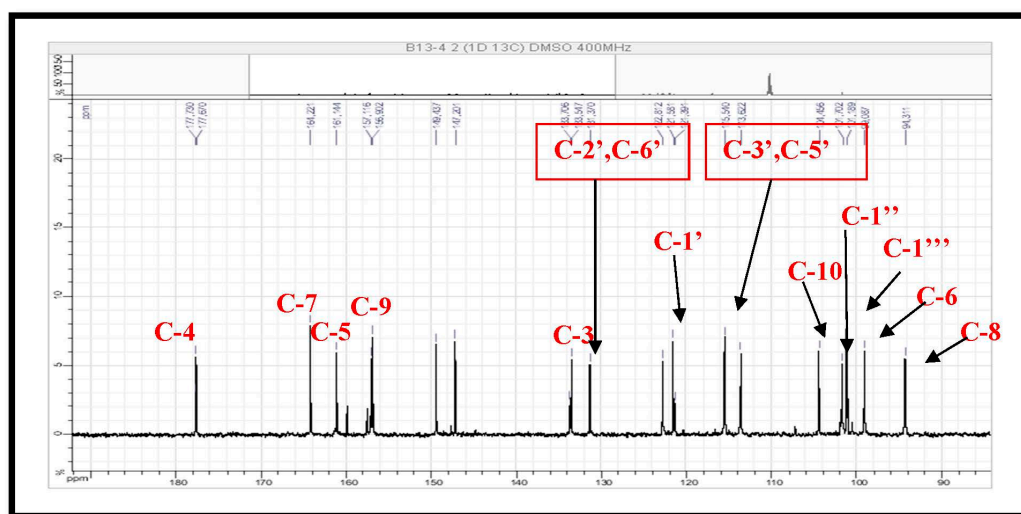

Figure S81. <sup>13</sup>C NMR spectrum (100 MHz, DMSO-*d*<sub>6</sub>, δppm) of nicotiflorin.

## Molecule 12: Rutin

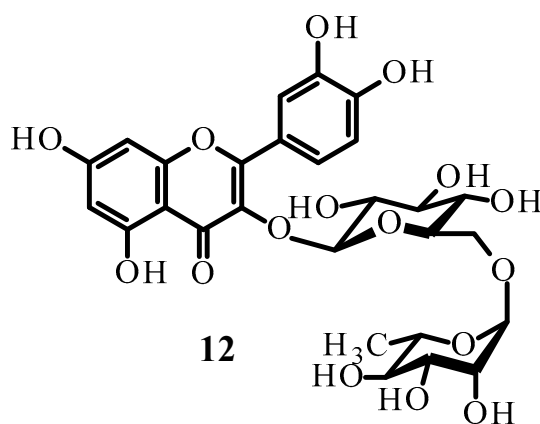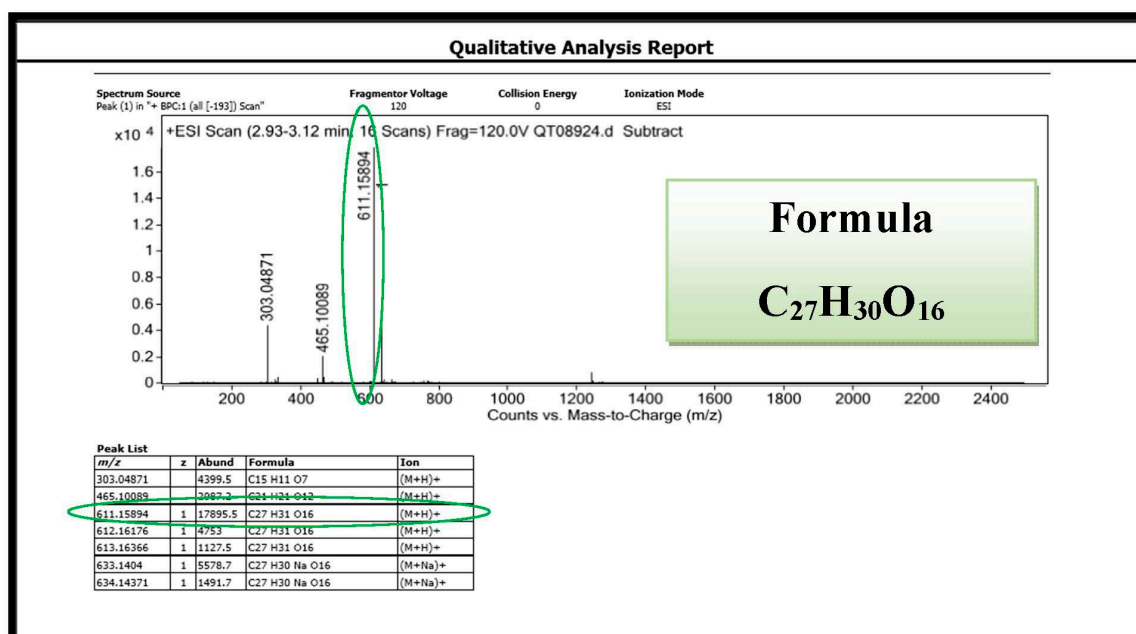

## Formula Calculator Results

| Formula           | Best | Mass      | Tgt Mass  | Diff (ppm) | Mz        | Ion Species          | Score |
|-------------------|------|-----------|-----------|------------|-----------|----------------------|-------|
| C22 H30 N2 O18    |      | 610.15118 | 610.14936 | -2.98      | 633.1404  | C22 H30 N2 Na O18    | 95.5  |
| C27 H30 O16       | TRUE | 610.15118 | 610.15338 | 3.62       | 633.1404  | C27 H30 Na O16       | 91.97 |
| C31 H30 O11 S     |      | 610.15118 | 610.15088 | -0.49      | 633.1404  | C31 H30 Na O11 S     | 88.51 |
| C19 H34 N2 O18 S  |      | 610.15119 | 610.15273 | 2.54       | 633.1404  | C19 H34 N2 Na O18 S  | 87.51 |
| C32 H26 N4 O7 S   |      | 610.15119 | 610.15222 | 1.69       | 633.1404  | C32 H26 N4 Na O7 S   | 84.18 |
| C23 H34 N2 O13 S2 |      | 610.15119 | 610.15023 | -1.57      | 633.1404  | C23 H34 N2 Na O13 S2 | 82.51 |
| C27 H30 O16       | TRUE | 610.15166 | 610.15338 | -2.83      | 611.15894 | C27 H31 O16          | 93.54 |
| C22 H30 N2 O18    |      | 610.15166 | 610.14936 | -3.76      | 611.15894 | C22 H31 N2 O18       | 92.68 |
| C19 H34 N2 O18 S  |      | 610.15166 | 610.15273 | 1.76       | 611.15894 | C19 H35 N2 O18 S     | 88.65 |
| C31 H30 O11 S     |      | 610.15166 | 610.15088 | -1.27      | 611.15894 | C31 H31 O11 S        | 87.09 |
| C32 H26 N4 O7 S   |      | 610.15166 | 610.15222 | 0.91       | 611.15894 | C32 H27 N4 O7 S      | 84.82 |
| C23 H34 N2 O13 S2 |      | 610.15166 | 610.15023 | -2.35      | 611.15894 | C23 H35 N2 O13 S2    | 80.33 |
| C21 H20 O12       | TRUE | 464.09361 | 464.09548 | 4.02       | 465.10089 | C21 H21 O12          | 93.12 |
| C25 H20 O7 S      |      | 464.09361 | 464.09297 | -1.38      | 465.10089 | C25 H21 O7 S         | 89.29 |
| C16 H20 N2 O14    |      | 464.09361 | 464.09145 | -4.66      | 465.10089 | C16 H21 N2 O14       | 89.1  |
| C26 H16 N4 O3 S   |      | 464.09362 | 464.09431 | 1.5        | 465.10089 | C26 H17 N4 O3 S      | 86.05 |
| C13 H24 N2 O14 S  |      | 464.09362 | 464.09482 | 2.6        | 465.10089 | C13 H25 N2 O14 S     | 83.01 |
| C15 H10 O7        | TRUE | 302.04143 | 302.04265 | 4.03       | 303.04871 | C15 H11 O7           | 95.35 |
| C19 H10 O2 S      |      | 302.04144 | 302.04015 | -4.26      | 303.04871 | C19 H11 O2 S         | 83.83 |
| C7 H14 N2 O9 S    |      | 302.04144 | 302.042   | 1.86       | 303.04871 | C7 H15 N2 O9 S       | 80.49 |

Figure S82. ESI-HRMS(+) of rutin.

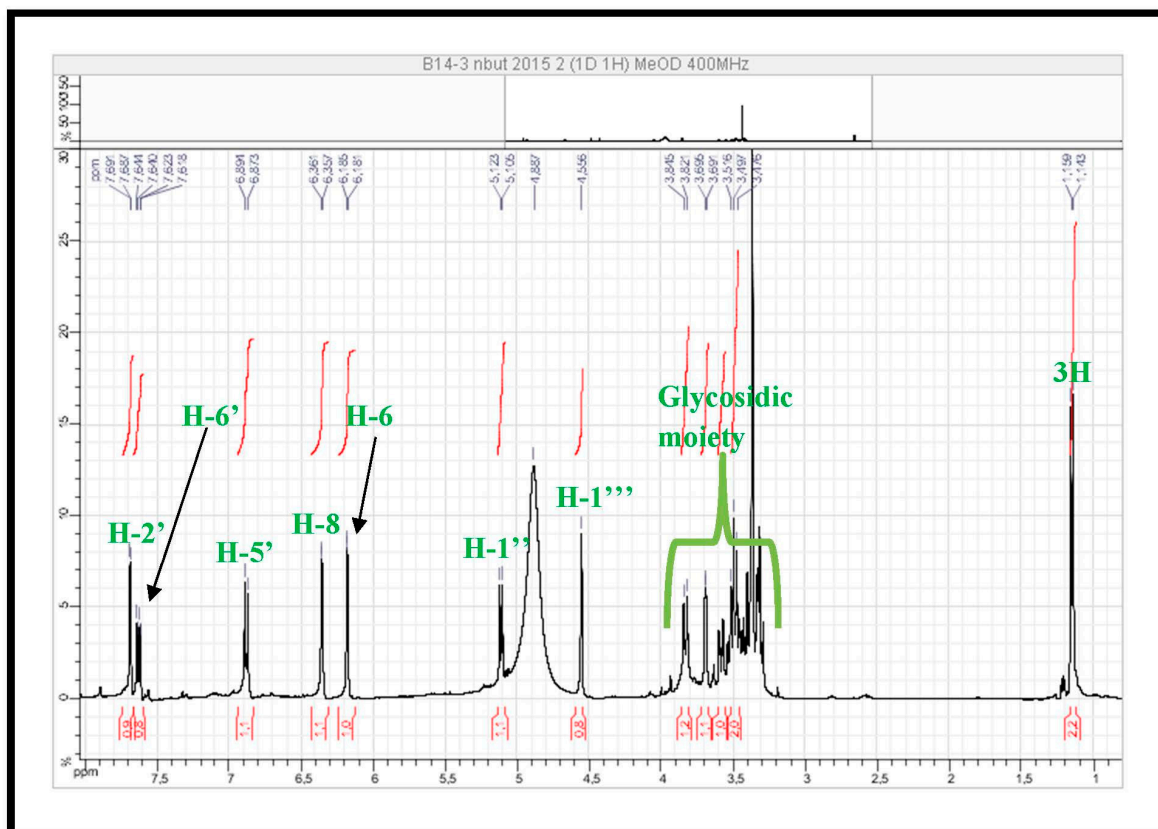

Figure S83.  $^1\text{H}$  NMR spectrum (400 MHz,  $\text{CD}_3\text{OD}$ ,  $\delta\text{ppm}$ ) of rutin.

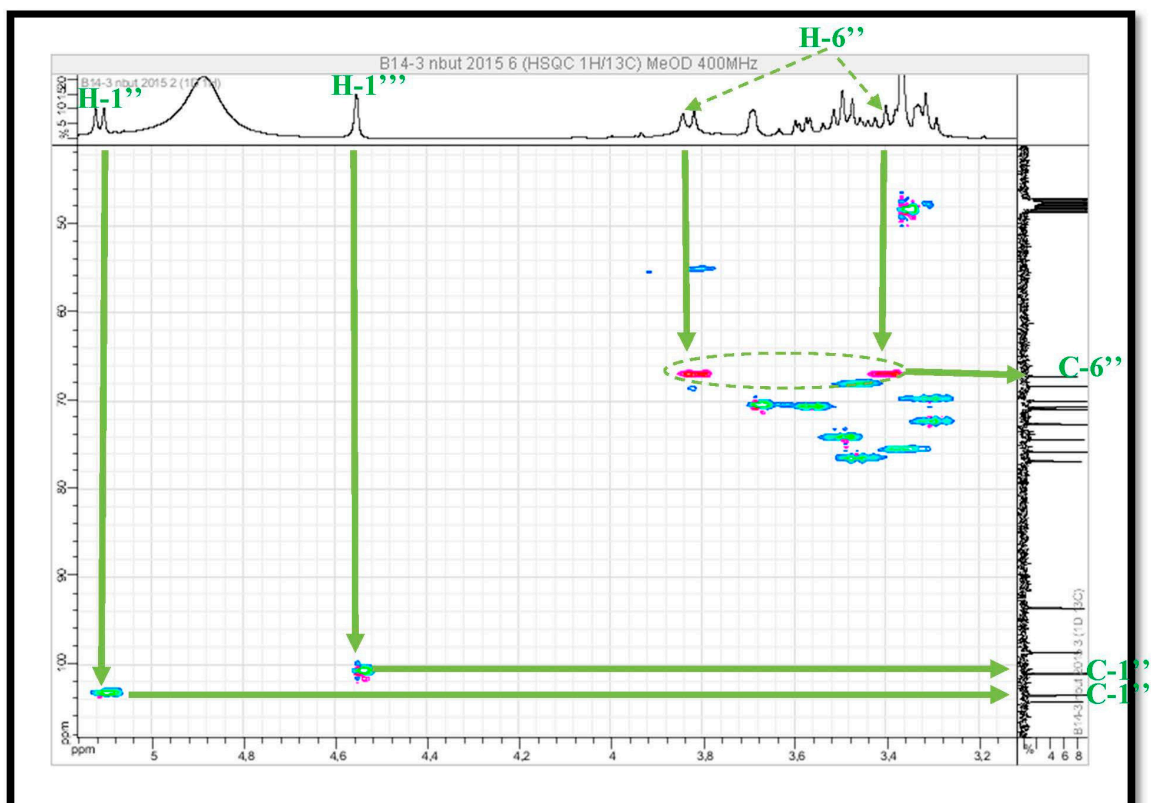

Figure S84. HSQC NMR spectrum (spreading out 1) (400 MHz,  $\text{CD}_3\text{OD}$ ,  $\delta\text{ppm}$ ) of rutin.

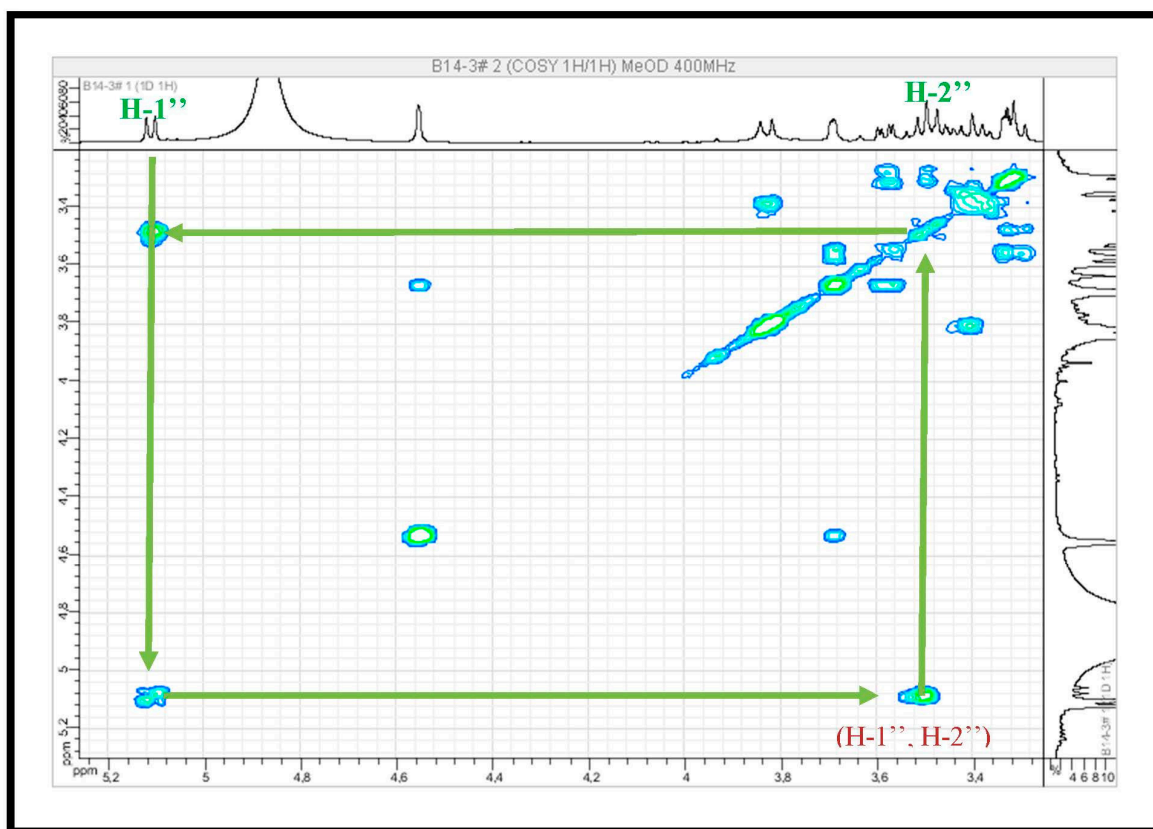

Figure S85. COSY NMR spectrum (spreading out 1) (400 MHz, CD<sub>3</sub>OD, δppm) of rutin.

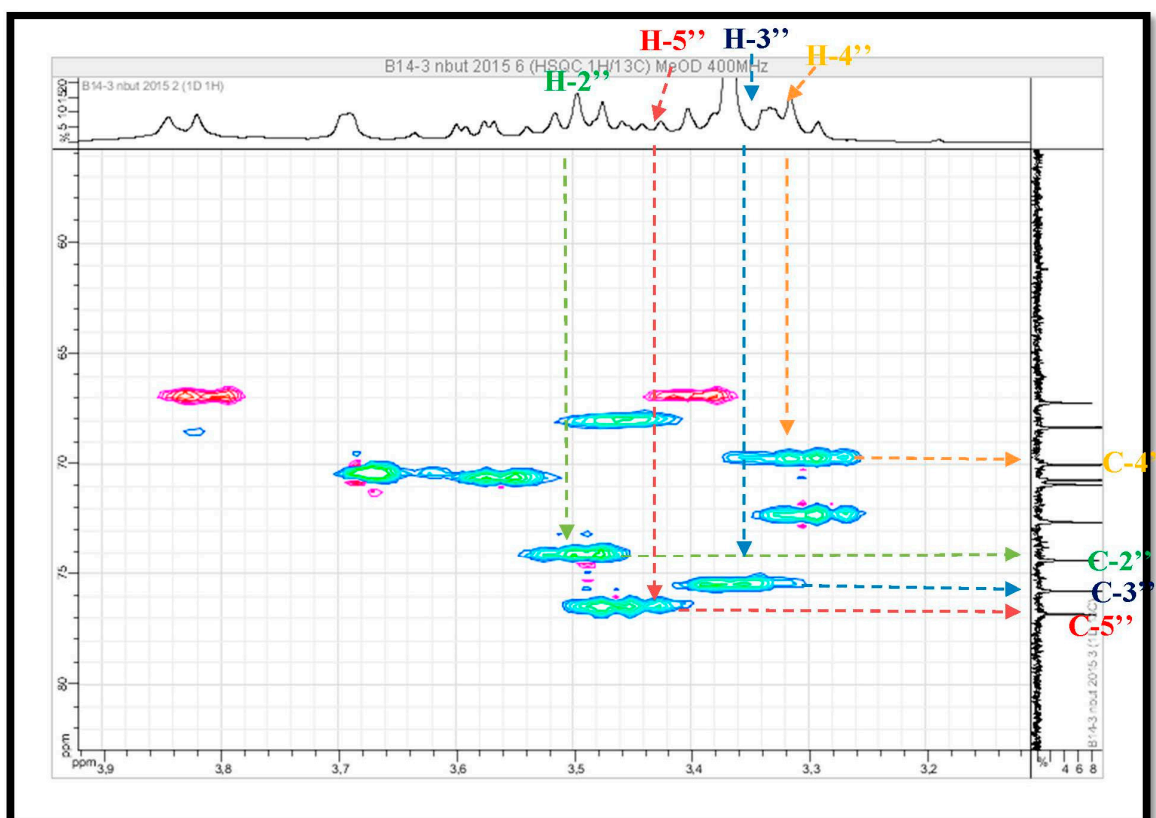

Figure S86. HSQC NMR spectrum (spreading out 2) (400 MHz, CD<sub>3</sub>OD, δppm) of rutin.



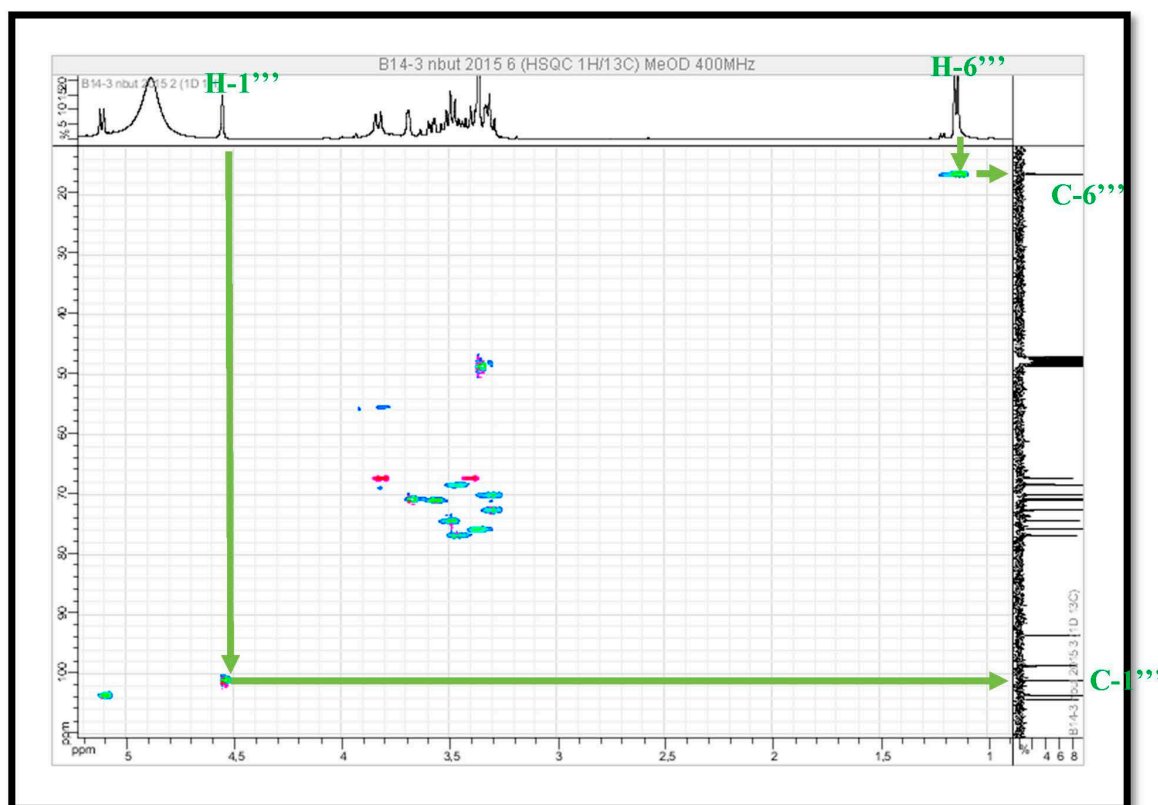

Figure S87. HSQC NMR spectrum (spreading out 3) (400 MHz,  $\text{CD}_3\text{OD}$ ,  $\delta\text{ppm}$ ) of rutin.

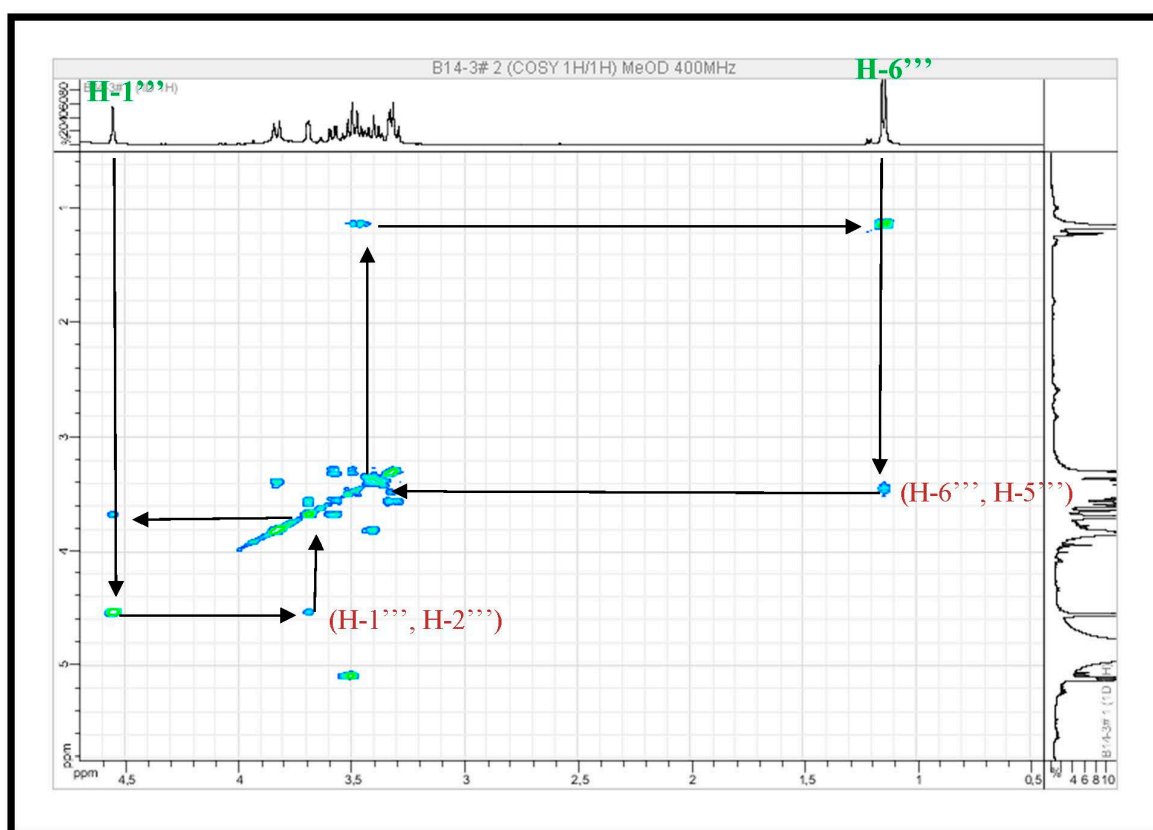

Figure S88. COSY NMR spectrum (spreading out 2) (400 MHz,  $\text{CD}_3\text{OD}$ ,  $\delta\text{ppm}$ ) of rutin.

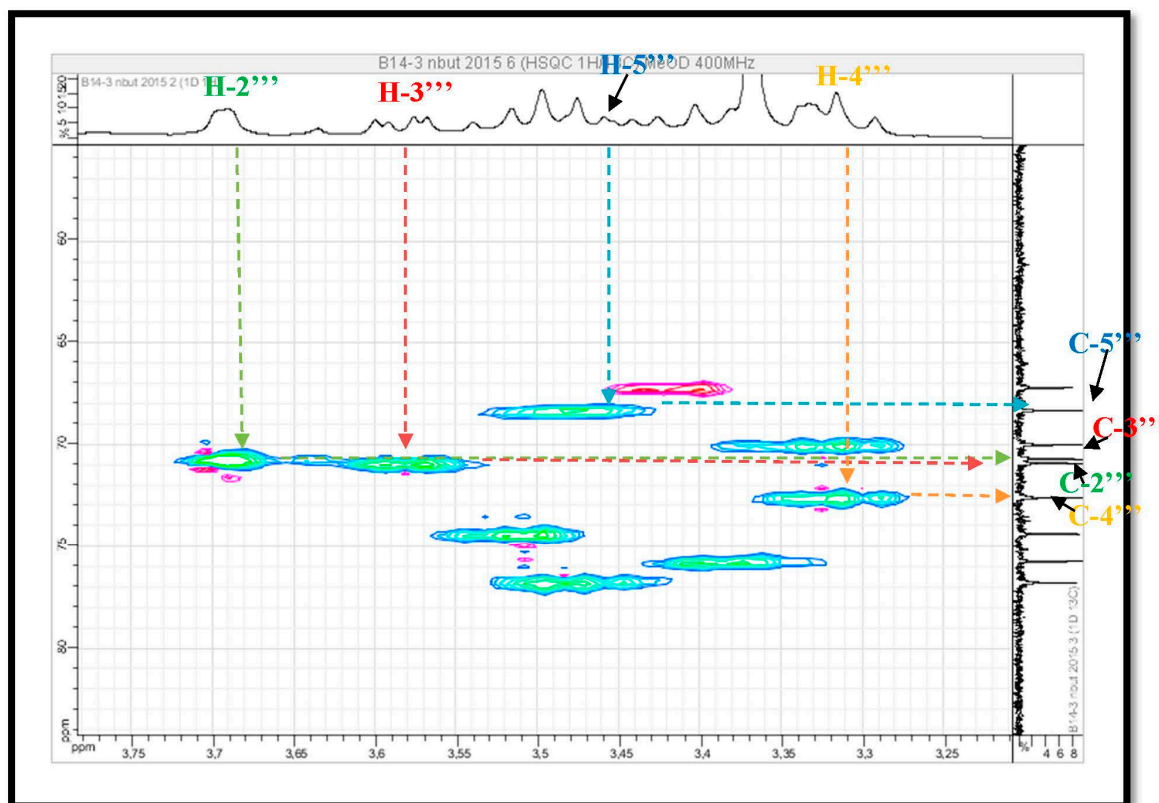

Figure S89. HMBC NMR spectrum (spreading out 1) (400 MHz, CD<sub>3</sub>OD,  $\delta$ ppm) of rutin.

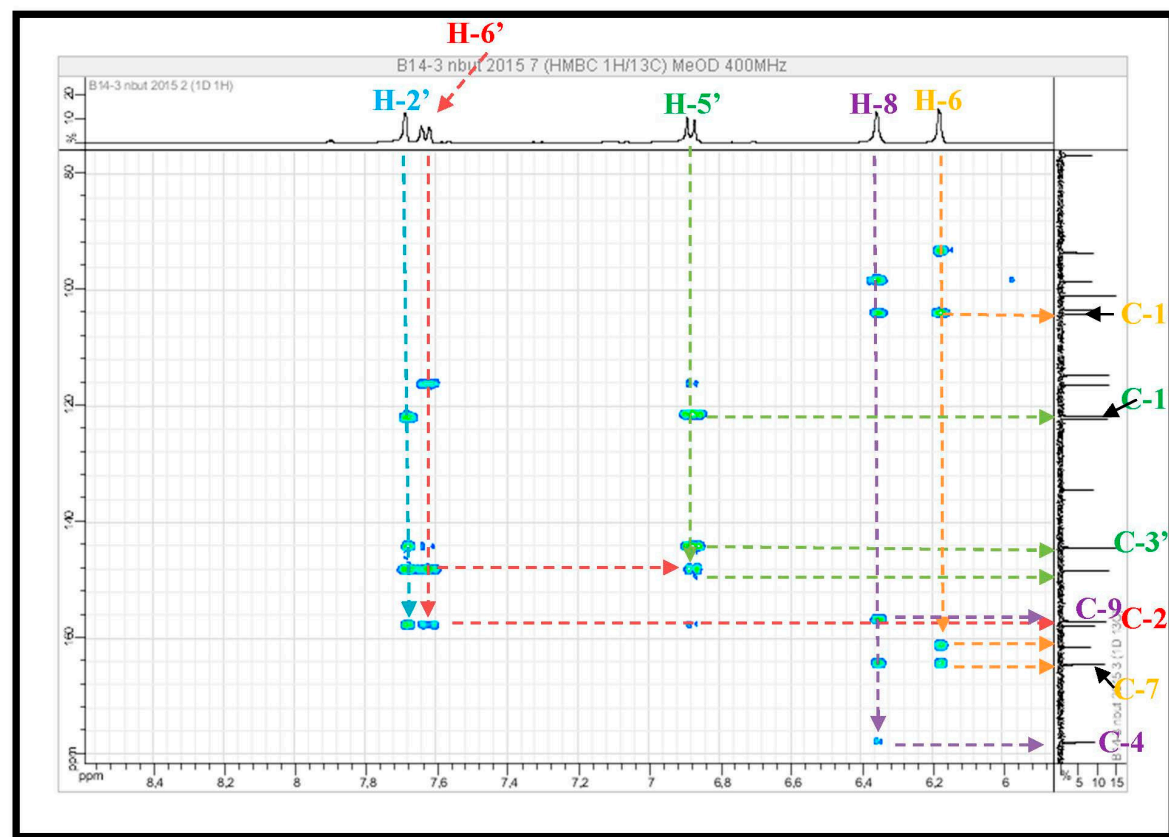

Figure S90. HMBC NMR spectrum (spreading out 2) (400 MHz, CD<sub>3</sub>OD,  $\delta$ ppm) of rutin.

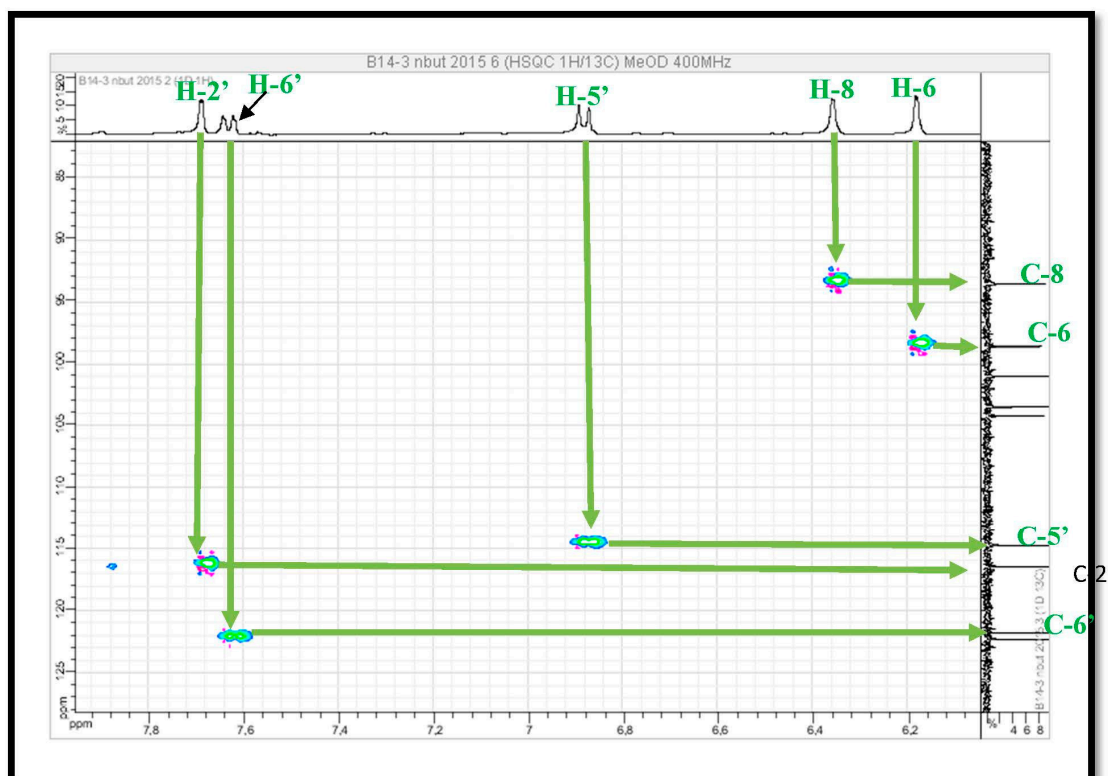

Figure S91. HMBC NMR spectrum (spreading out 4) (400 MHz, CD<sub>3</sub>OD, δppm) of rutin.

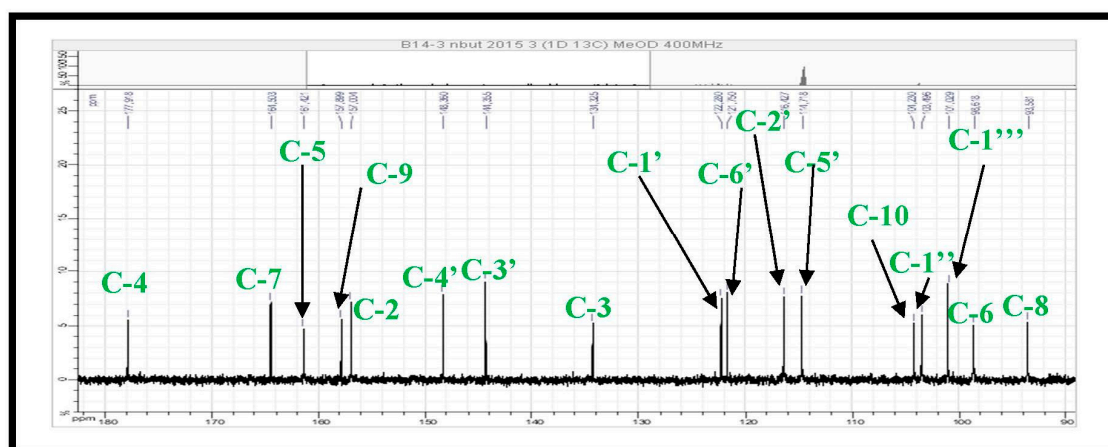

Figure S92. <sup>13</sup>C NMR spectrum (100 MHz, CD<sub>3</sub>OD, δppm) of rutin.

### Molecule 13: Vicenin-2

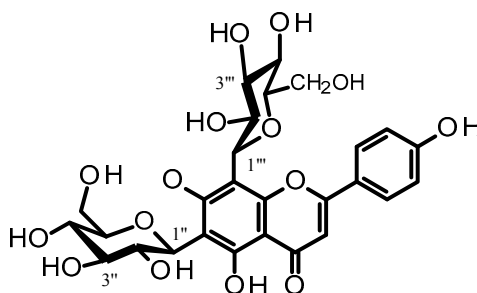

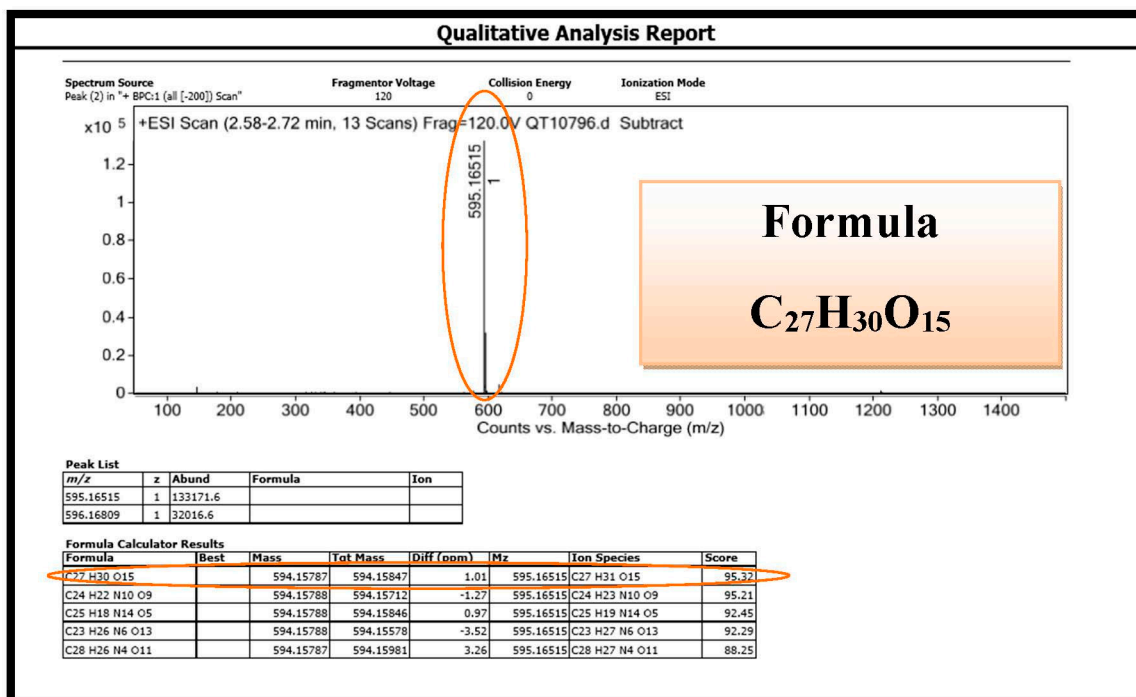

Figure S93. ESI-HRMS(+) of vicenin-2.

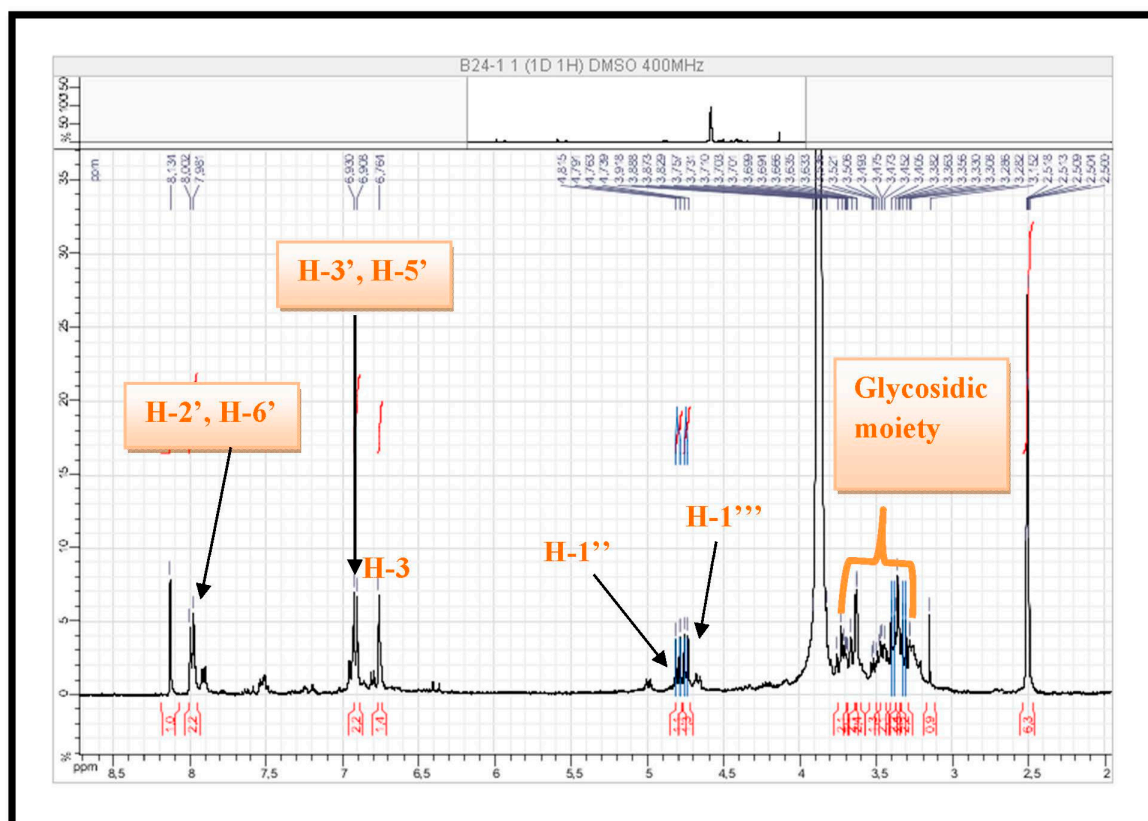Figure S94. <sup>1</sup>H NMR spectrum (400 MHz, DMSO-*d*<sub>6</sub>, δppm) of vicenin-2.

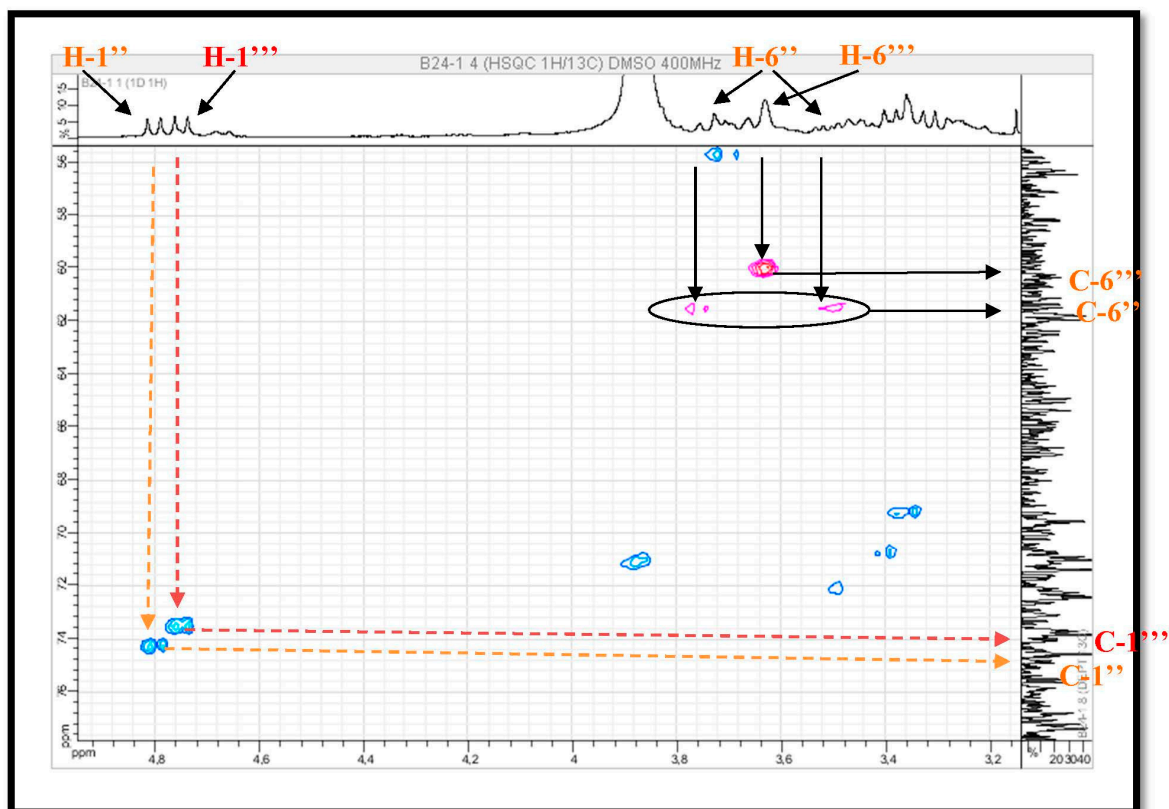

Figure S95. HSQC NMR spectrum (spreading out 1) (400 MHz,  $\text{DMSO-}d_6$ ,  $\delta\text{ppm}$ ) of vicenin-2.

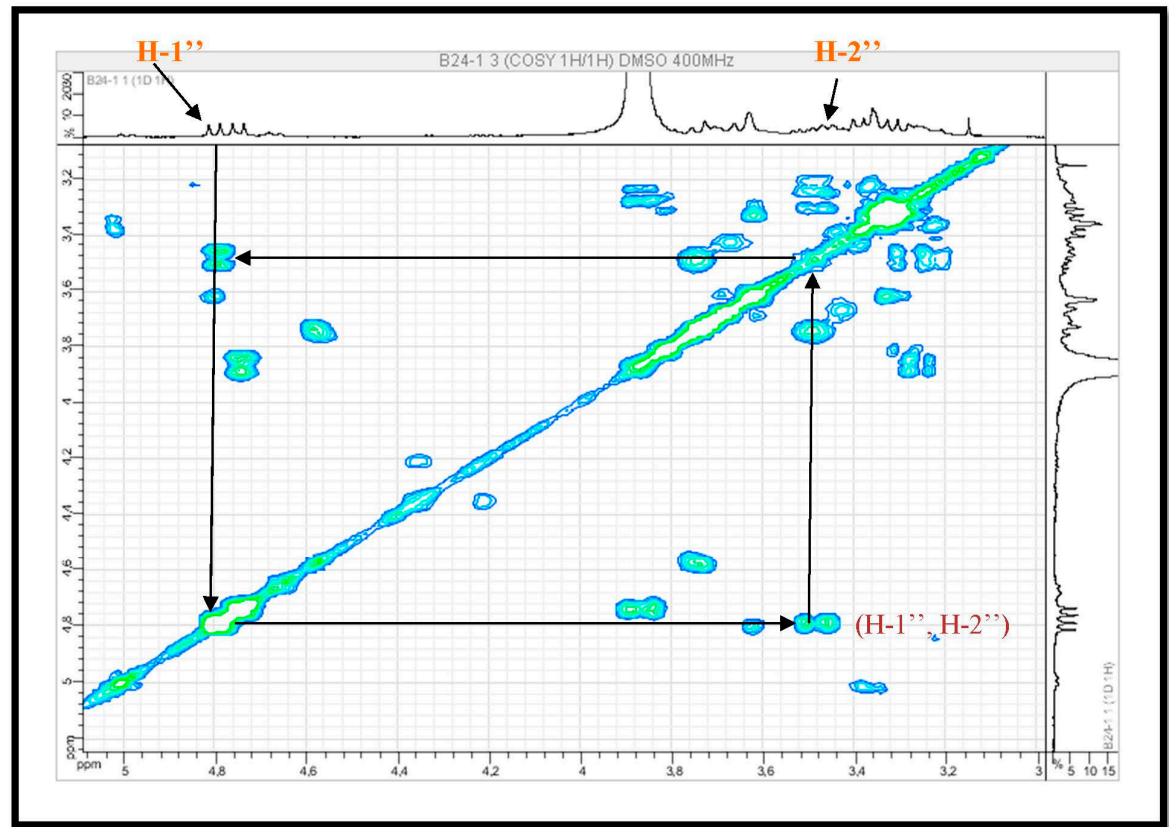

Figure S96. COSY NMR spectrum (spreading out 1) (400 MHz,  $\text{DMSO-}d_6$ ,  $\delta\text{ppm}$ ) of vicenin-2.

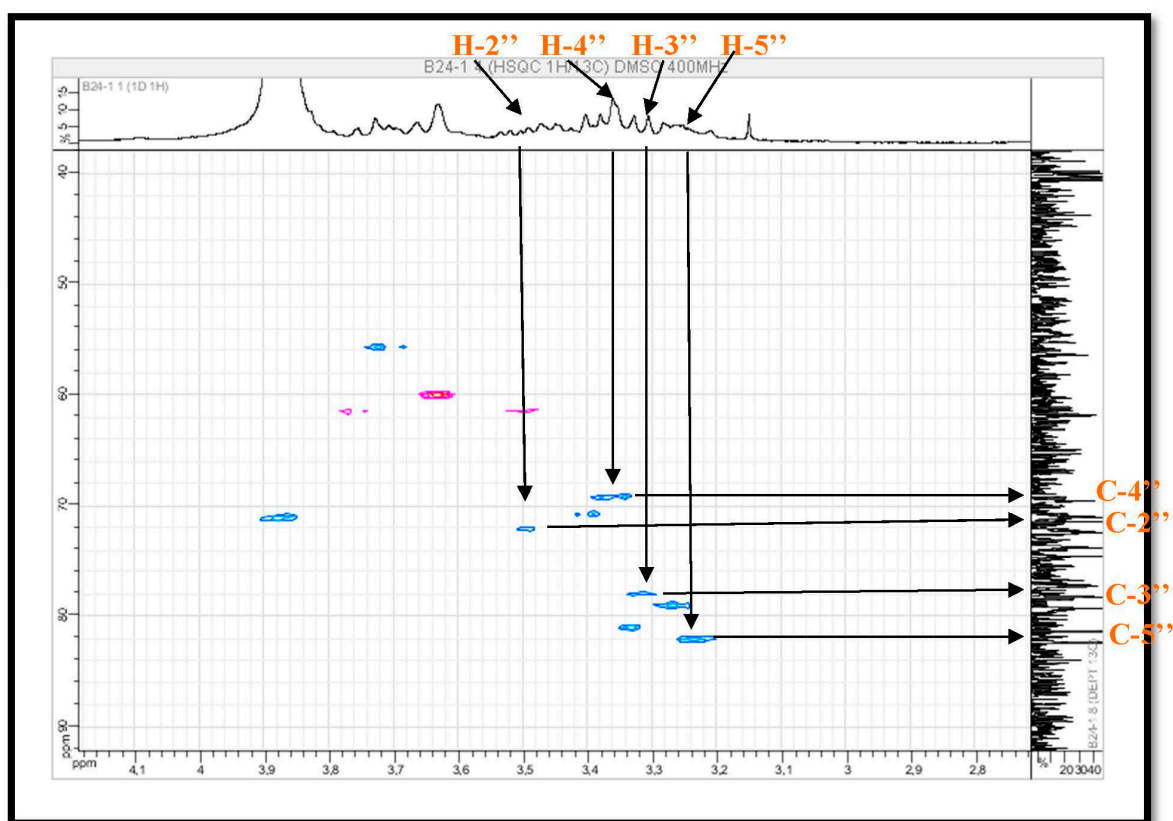

Figure S97. HSQC NMR spectrum (spreading out 2) (400 MHz, DMSO- $d_6$ ,  $\delta$ ppm) of vicenin-2.

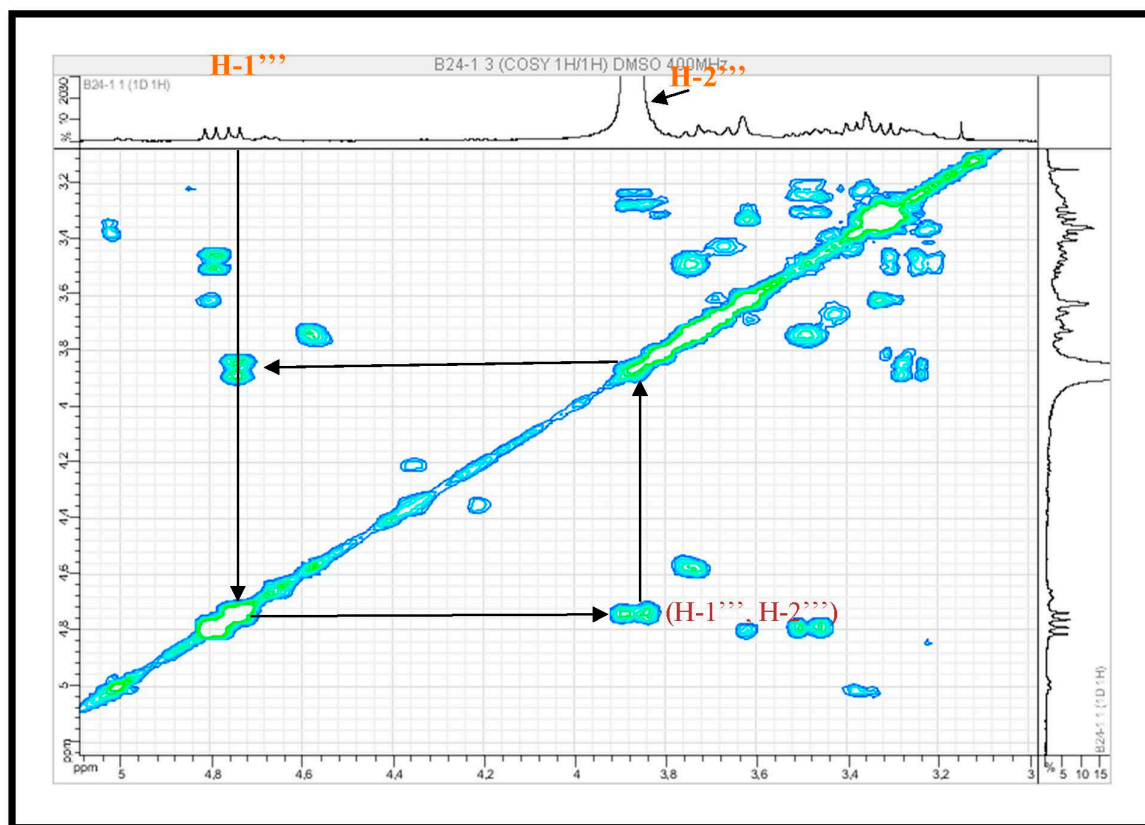

Figure S98. COSY NMR spectrum (spreading out 2) (400 MHz, DMSO- $d_6$ ,  $\delta$ ppm) of vicenin-2.

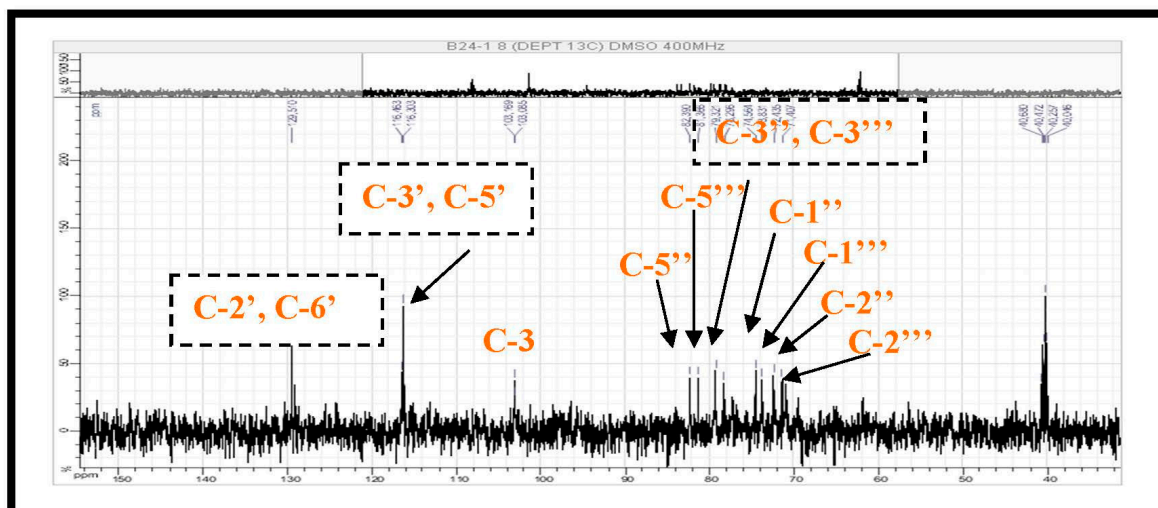

Figure S99.  $^{13}\text{C}$  NMR DEPT spectrum (100 MHz,  $\text{DMSO-}d_6$ ,  $\delta\text{ppm}$ ) of vicenin-2.

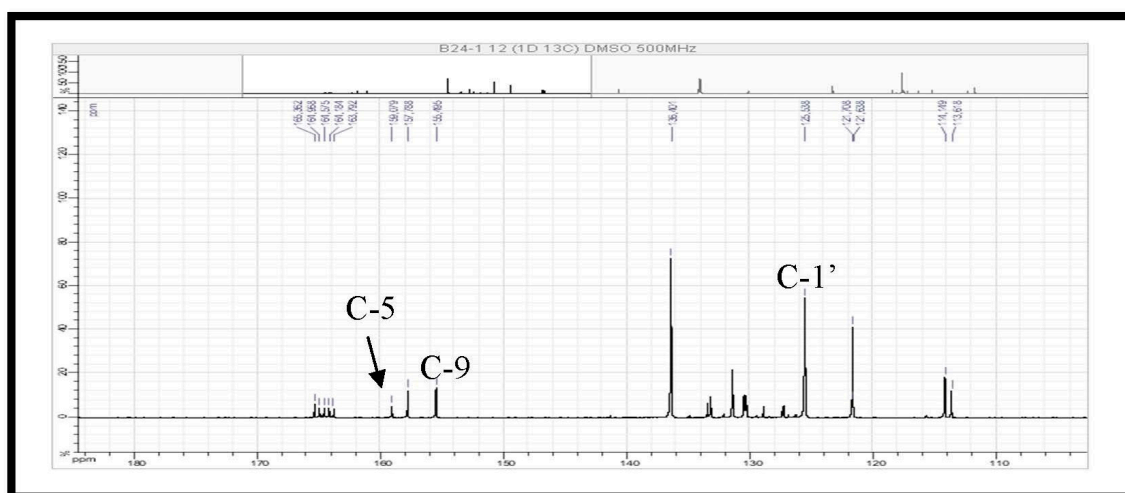

Figure S100.  $^{13}\text{C}$  NMR spectrum (100 MHz,  $\text{DMSO-}d_6$ ,  $\delta\text{ppm}$ ) of vicenin-2.

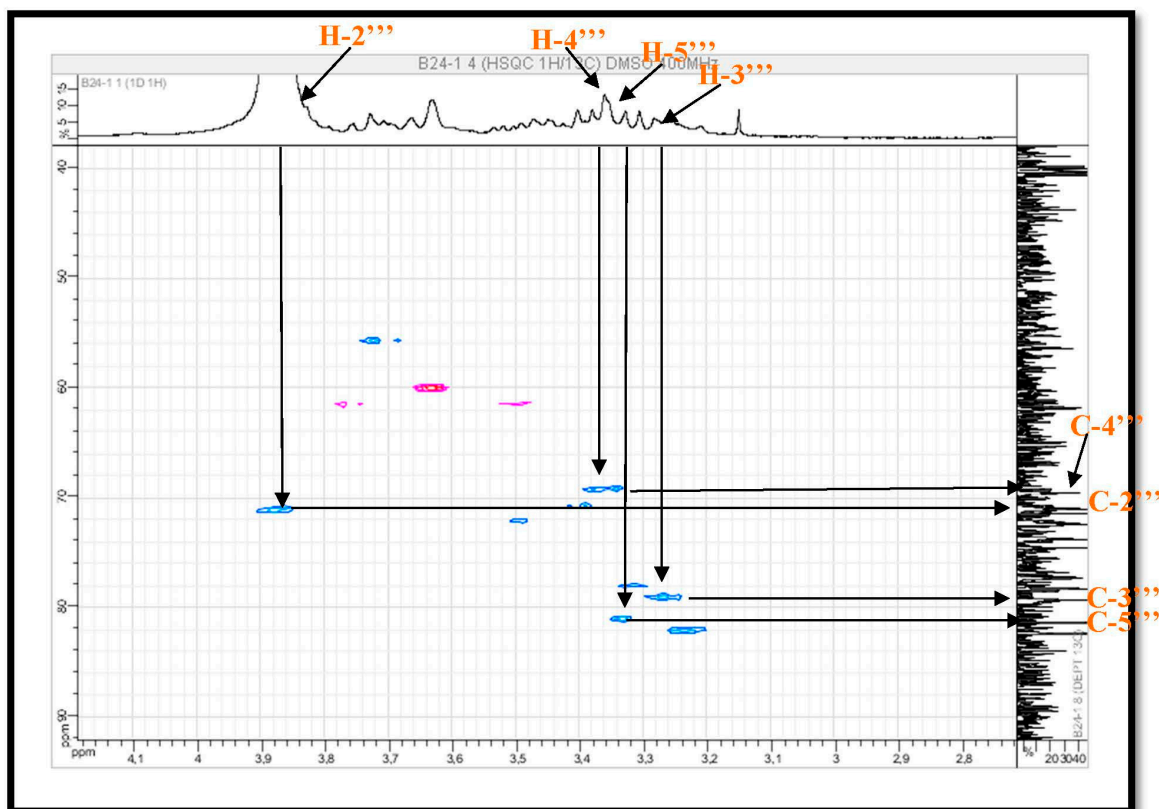

Figure S101. HSQC NMR spectrum (spreading out 3) (400 MHz, DMSO- $d_6$ ,  $\delta$ ppm) of vicenin-2.

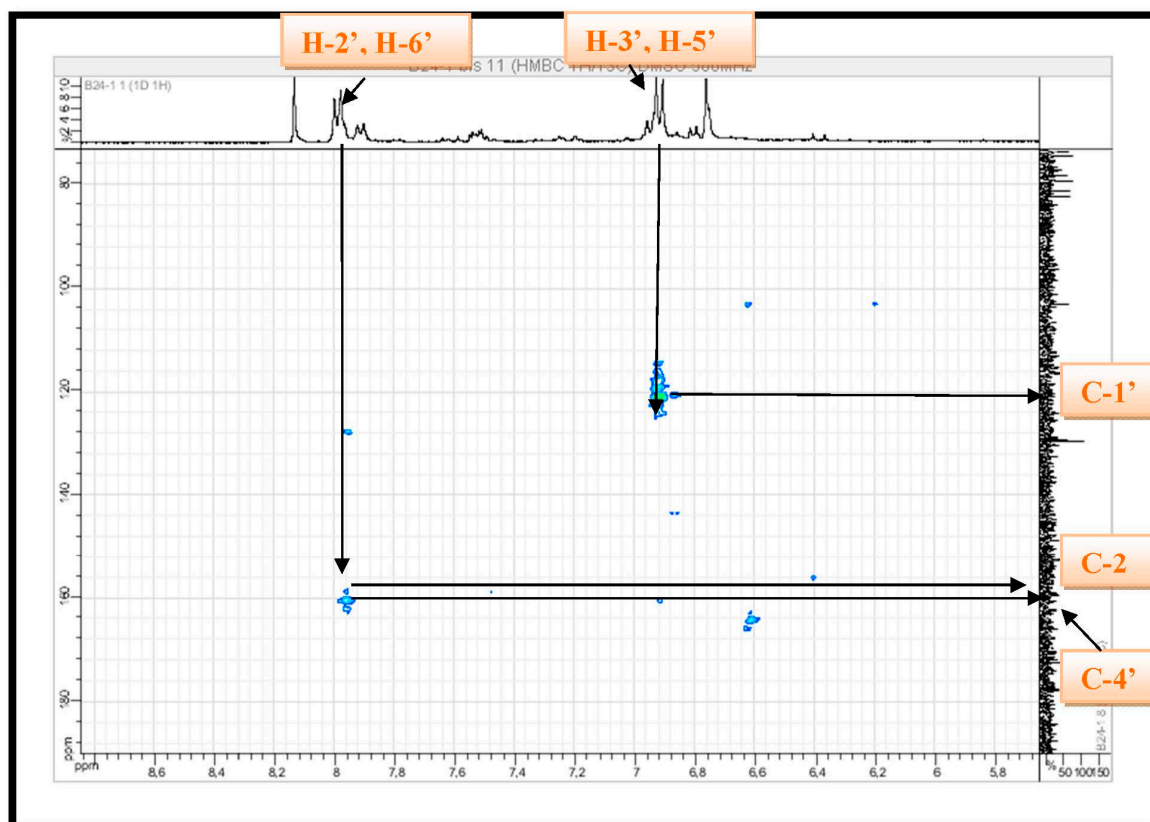

Figure S102. HMBC NMR spectrum (spreading out 1) (400 MHz, DMSO- $d_6$ ,  $\delta$ ppm) of vicenin-2.



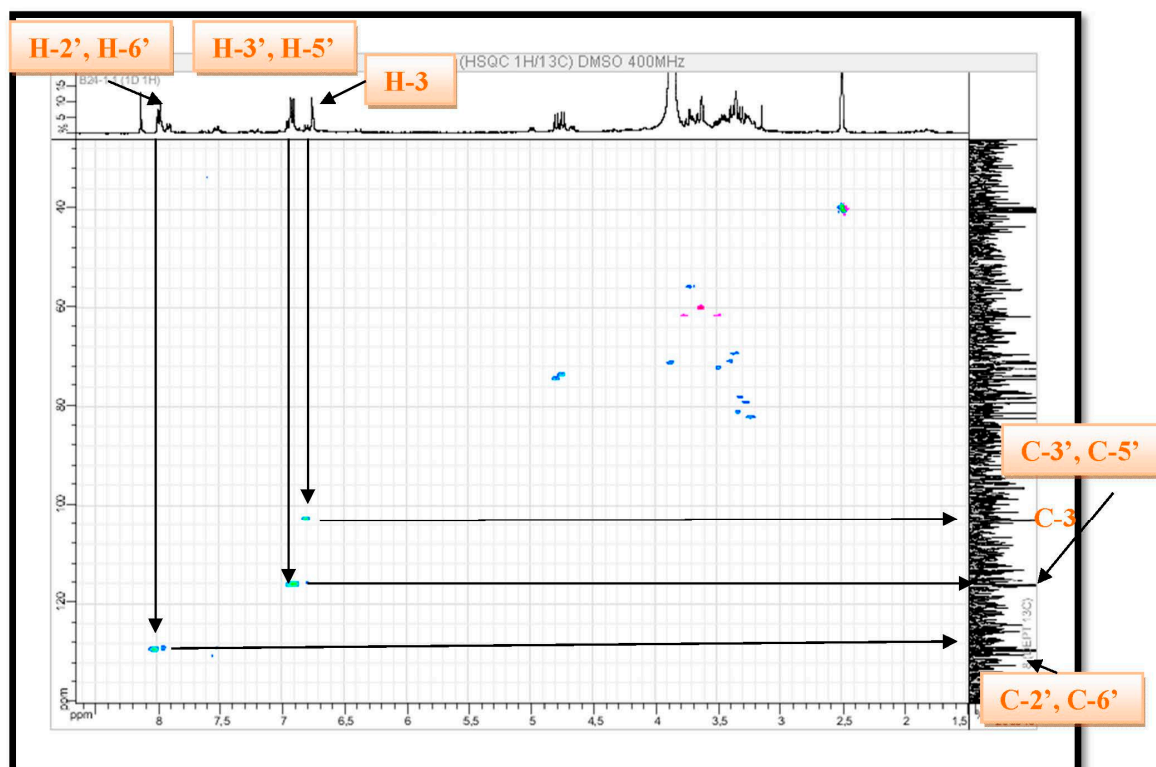

Figure S103. HSQC NMR spectrum (spreading out 4) (400 MHz, DMSO-*d*<sub>6</sub>,  $\delta$ ppm) of vicenin-2.

**Molecule 14:** Narcissin

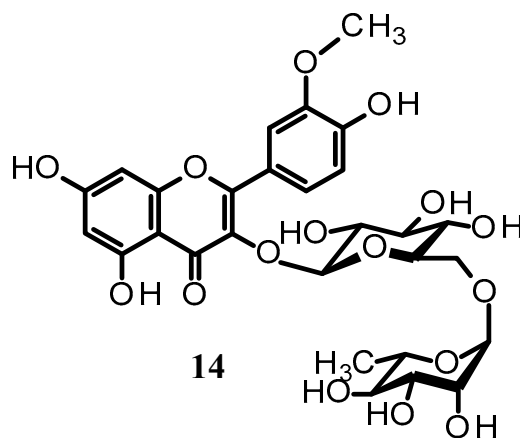

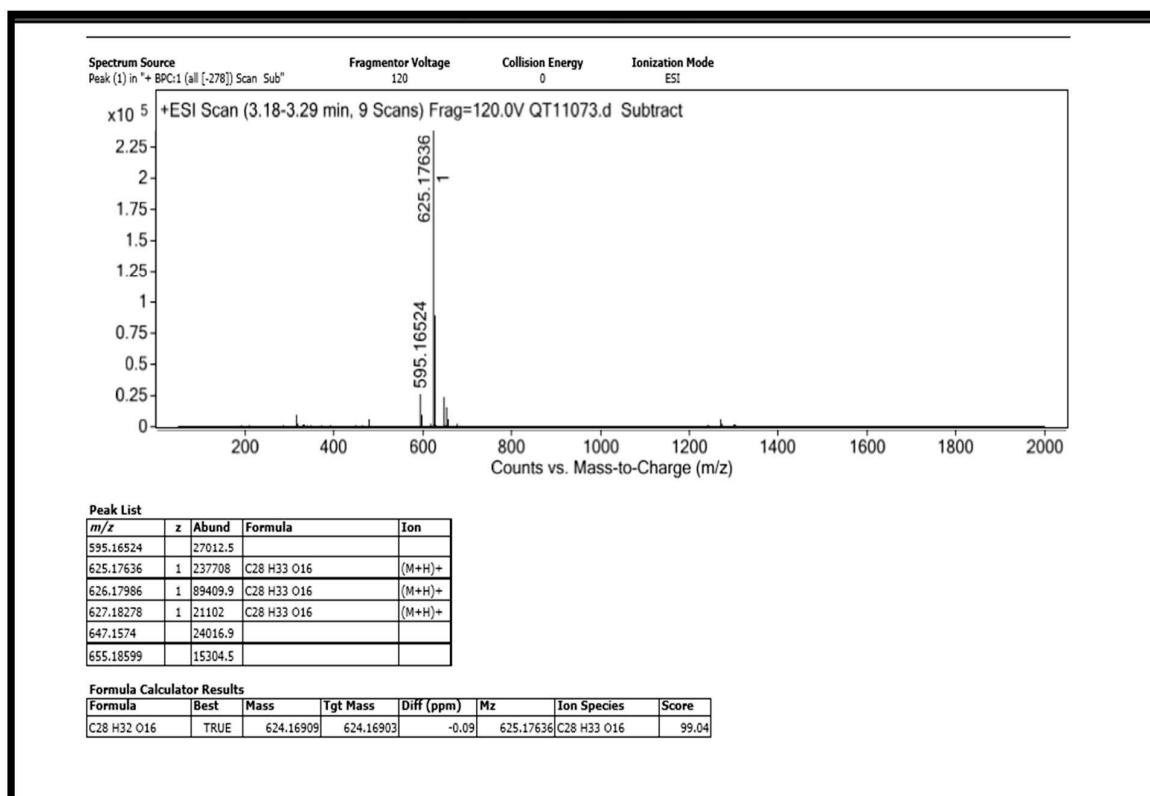

Figure S104. ESI-HRMS(+) of narcissin.

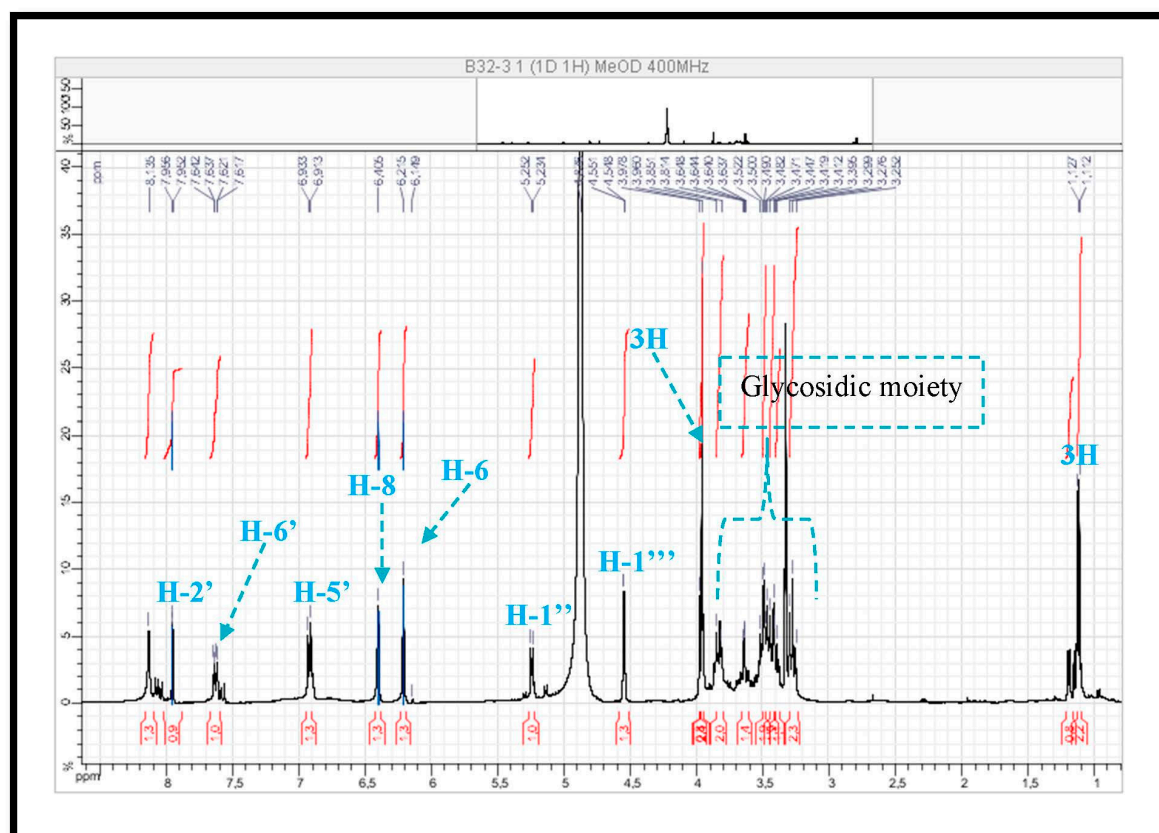Figure S105. <sup>1</sup>H NMR spectrum (400 MHz, CD<sub>3</sub>OD, δppm) of narcissin.

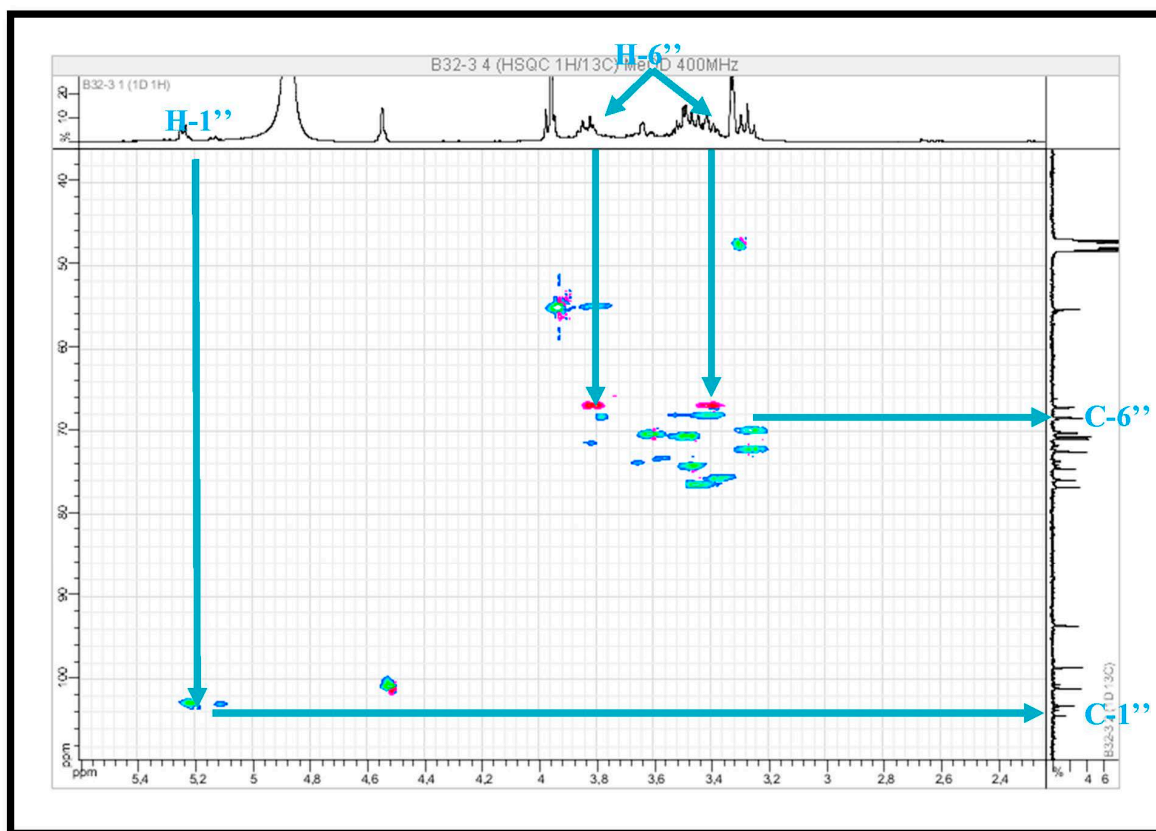

Figure S106. HSQC NMR spectrum (spreading out 1) (400 MHz,  $\text{CD}_3\text{OD}$ ,  $\delta\text{ppm}$ ) of narcissin.

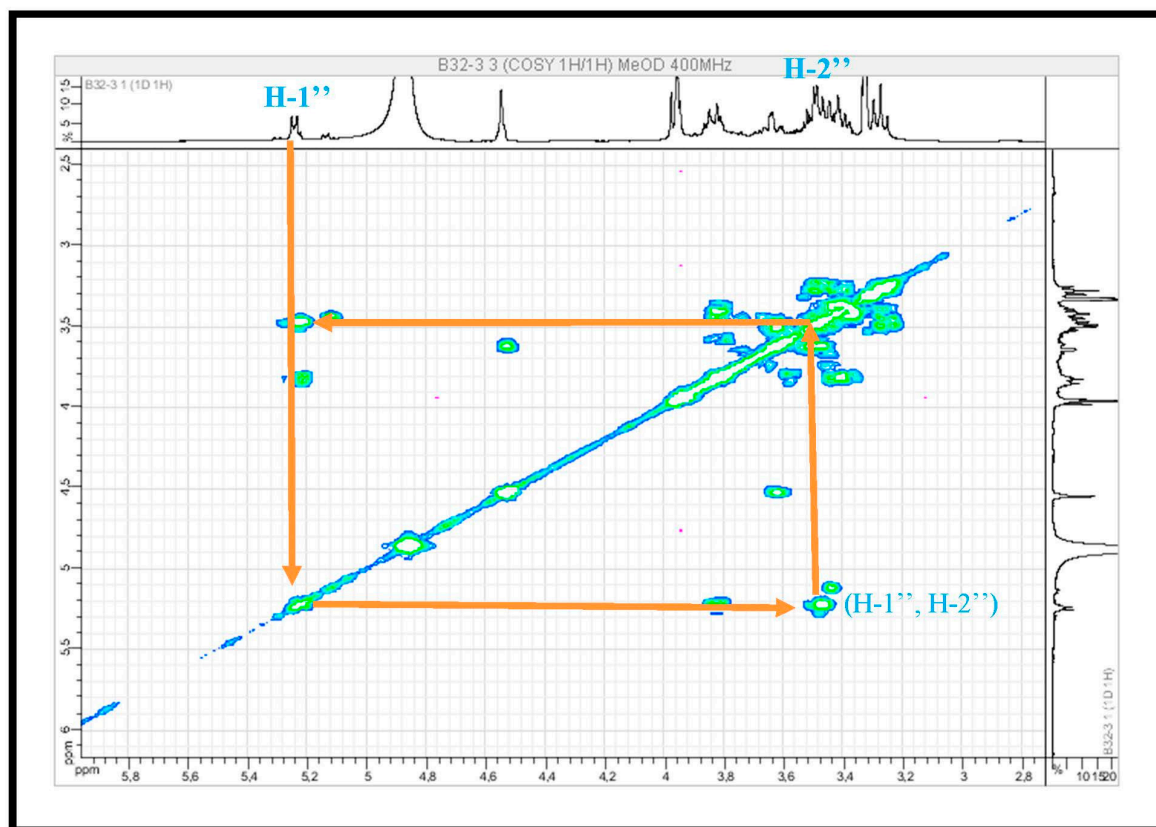

Figure S107. COSY NMR spectrum (spreading out 1) (400 MHz,  $\text{CD}_3\text{OD}$ ,  $\delta\text{ppm}$ ) of narcissin.

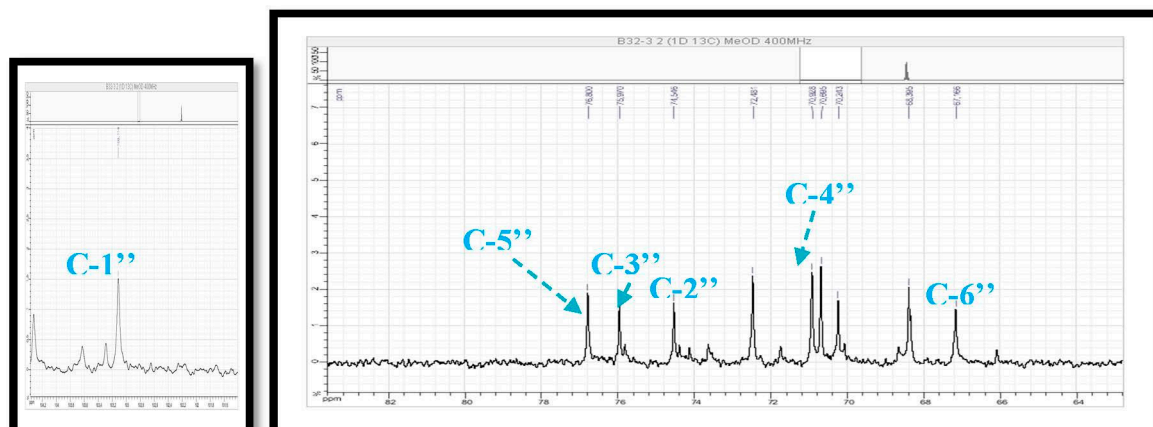

Figure S108.  $^{13}\text{C}$  NMR spectrum (spreading out 1) (100 MHz,  $\text{CD}_3\text{OD}$ ,  $\delta\text{ppm}$ ) of narcissin.

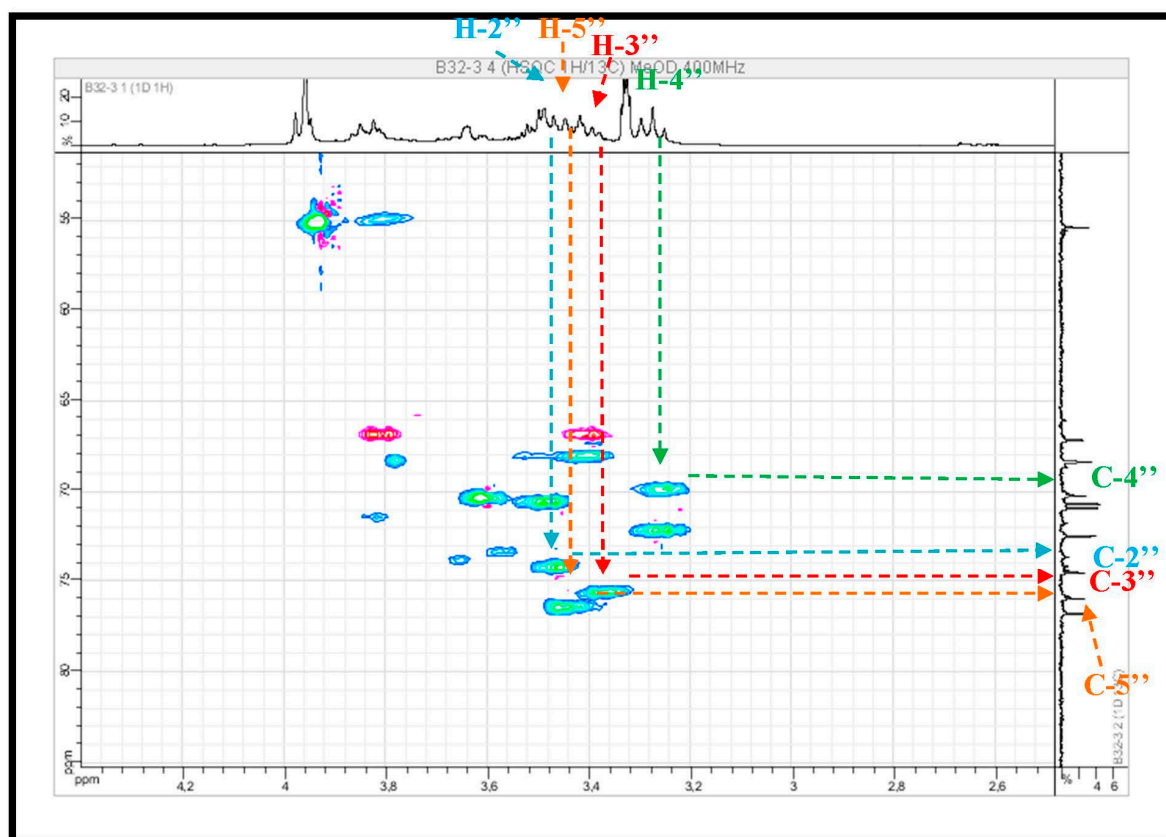

Figure S109. HSQC NMR spectrum (spreading out 2) (400 MHz,  $\text{CD}_3\text{OD}$ ,  $\delta\text{ppm}$ ) of narcissin.

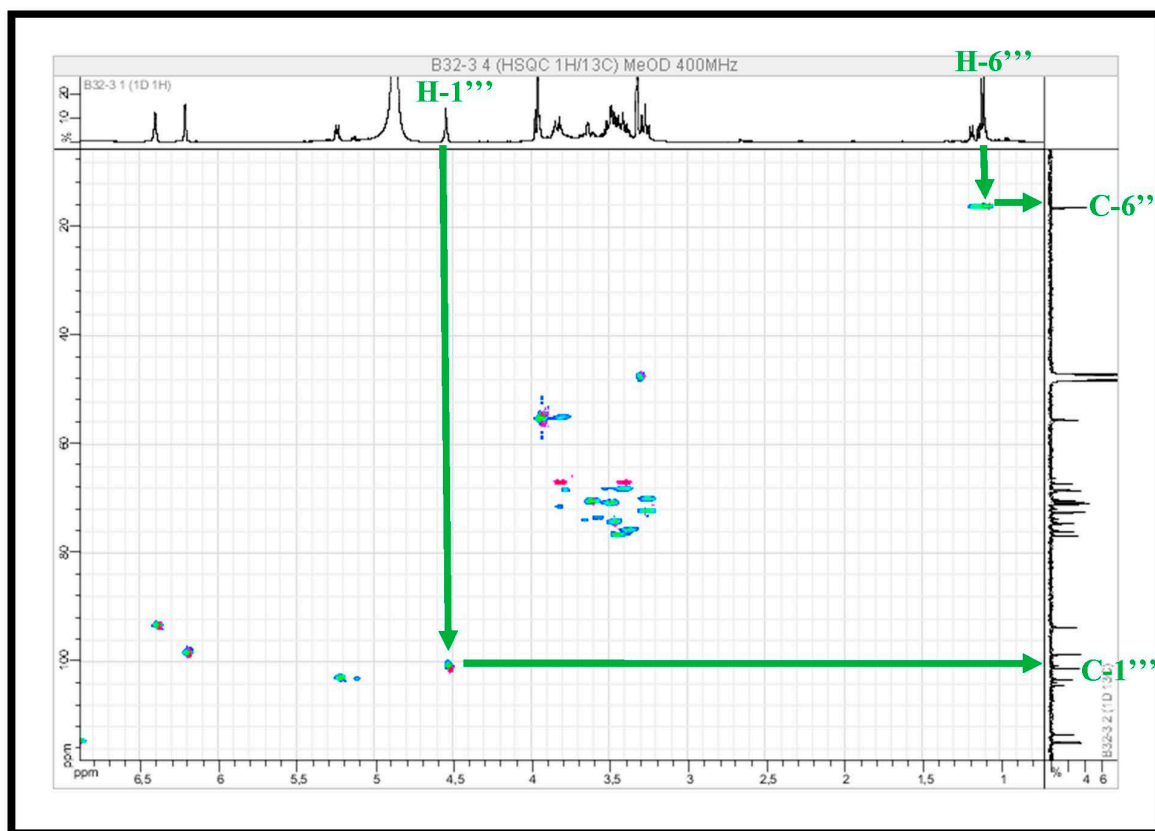

Figure S110. HSQC NMR spectrum (spreading out 3) (400 MHz,  $\text{CD}_3\text{OD}$ ,  $\delta\text{ppm}$ ) of narcissin.

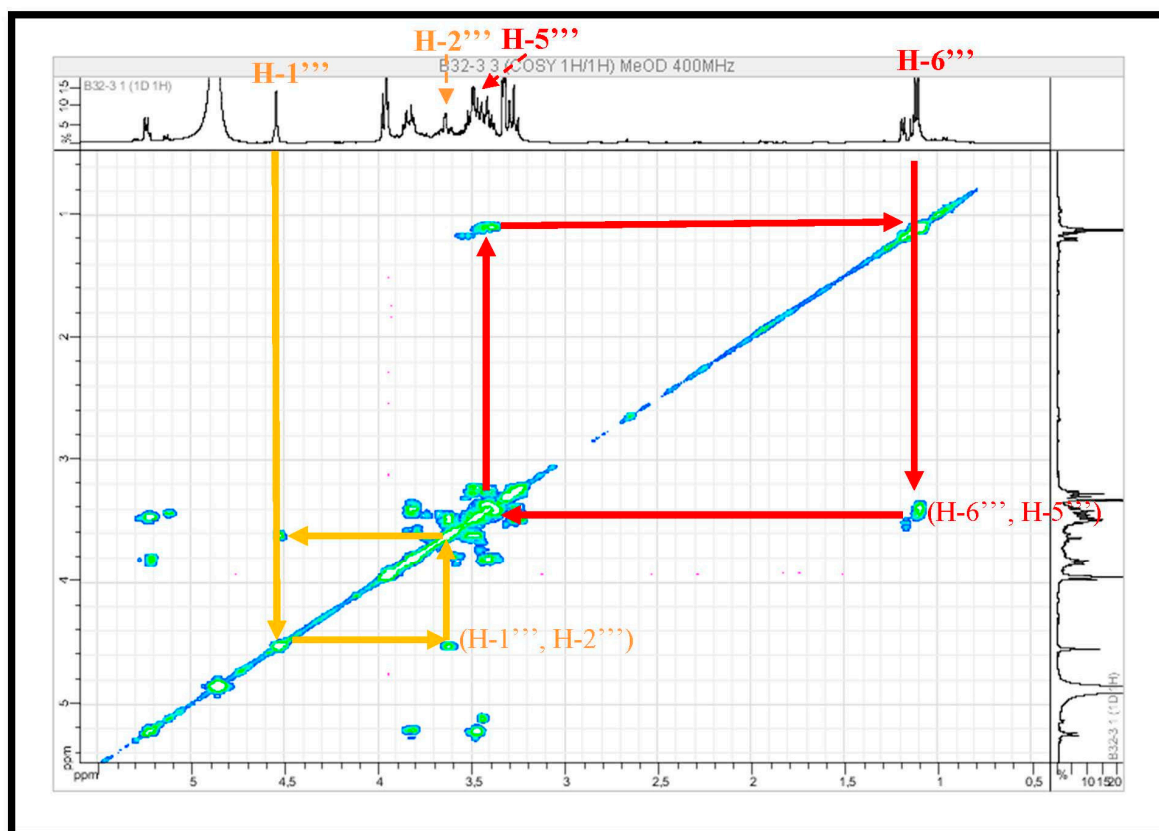

Figure S111. COSY NMR spectrum (spreading out 2) (400 MHz,  $\text{CD}_3\text{OD}$ ,  $\delta\text{ppm}$ ) of narcissin.

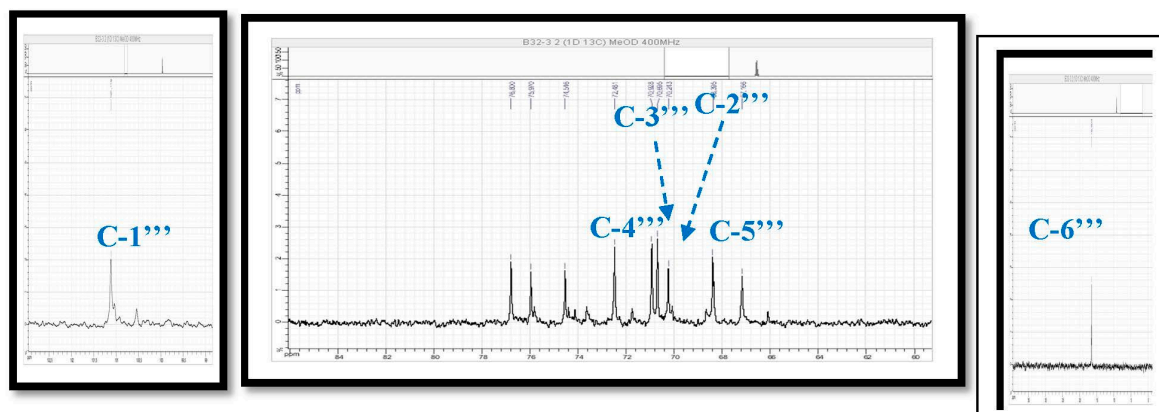

Figure S112.  $^{13}\text{C}$  NMR spectrum (spreading out 2) (100 MHz,  $\text{CD}_3\text{OD}$ ,  $\delta\text{ppm}$ ) of narcissin.

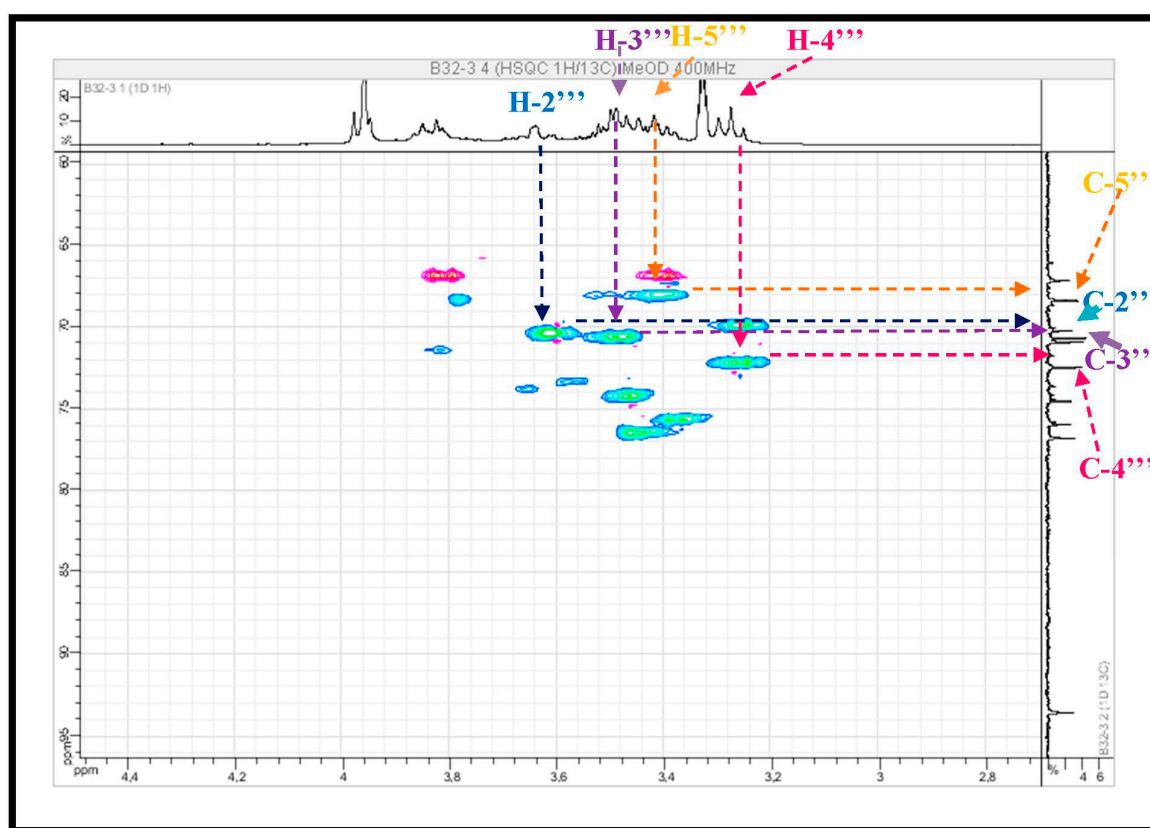

Figure S113. HSQC NMR spectrum (spreading out 4, 400 MHz,  $\text{CD}_3\text{OD}$ ,  $\delta\text{ppm}$ ) of narcissin.

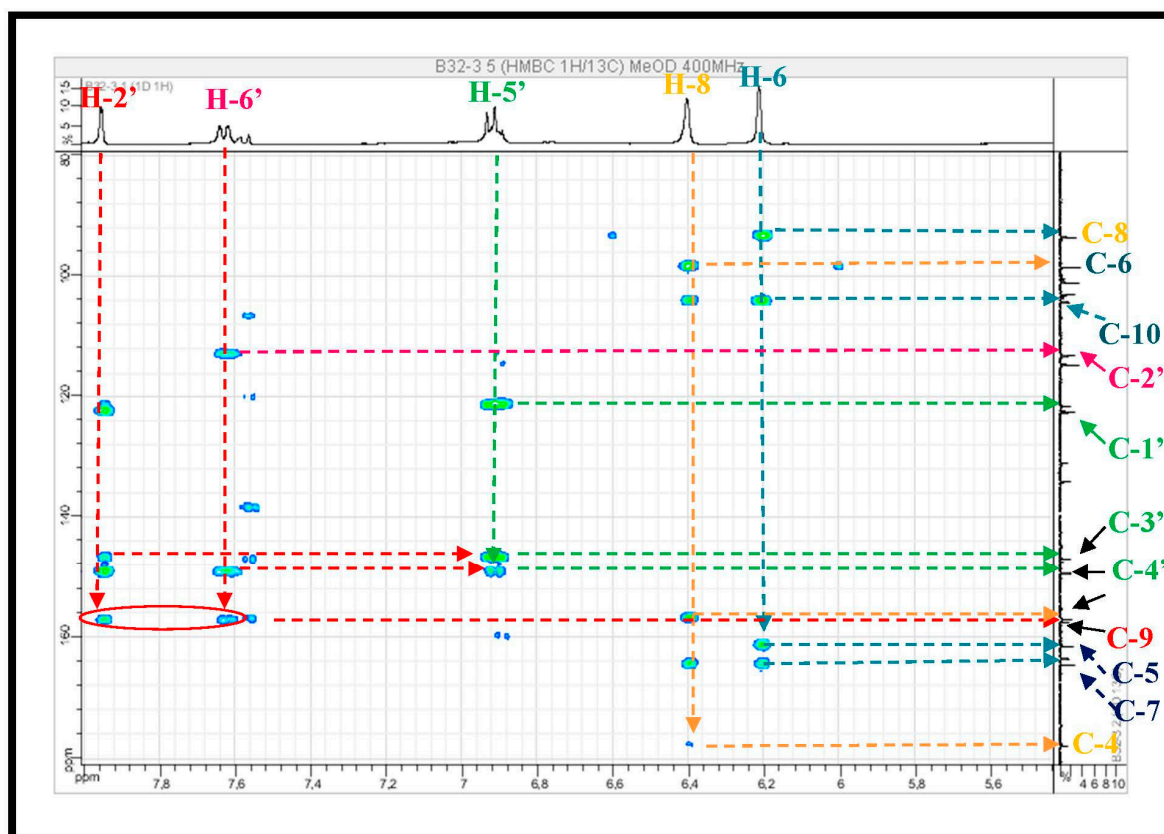

Figure S114. HMBC NMR spectrum (spreading out 1) (400 MHz,  $\text{CD}_3\text{OD}$ ,  $\delta$ ppm) of narcissin.

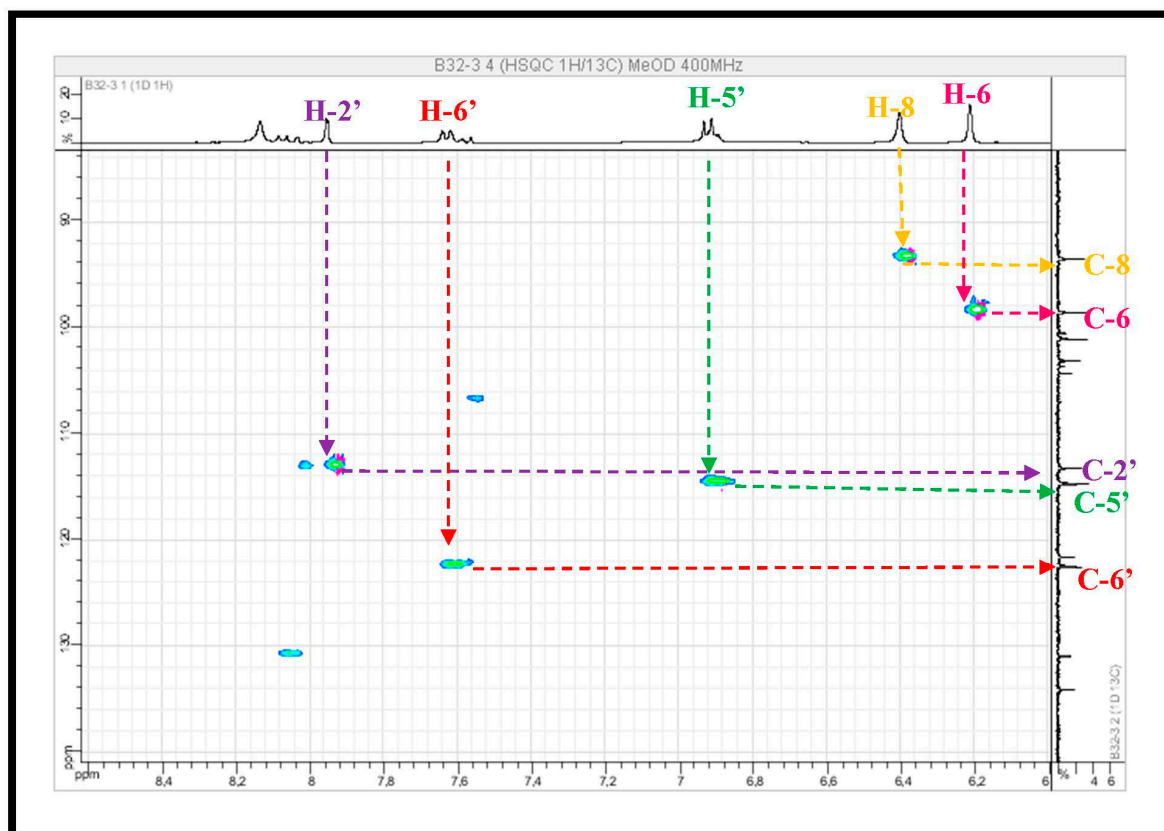

Figure S115. HSQC NMR spectrum (spreading out 5) (400 MHz,  $\text{CD}_3\text{OD}$ ,  $\delta$ ppm) of narcissin.

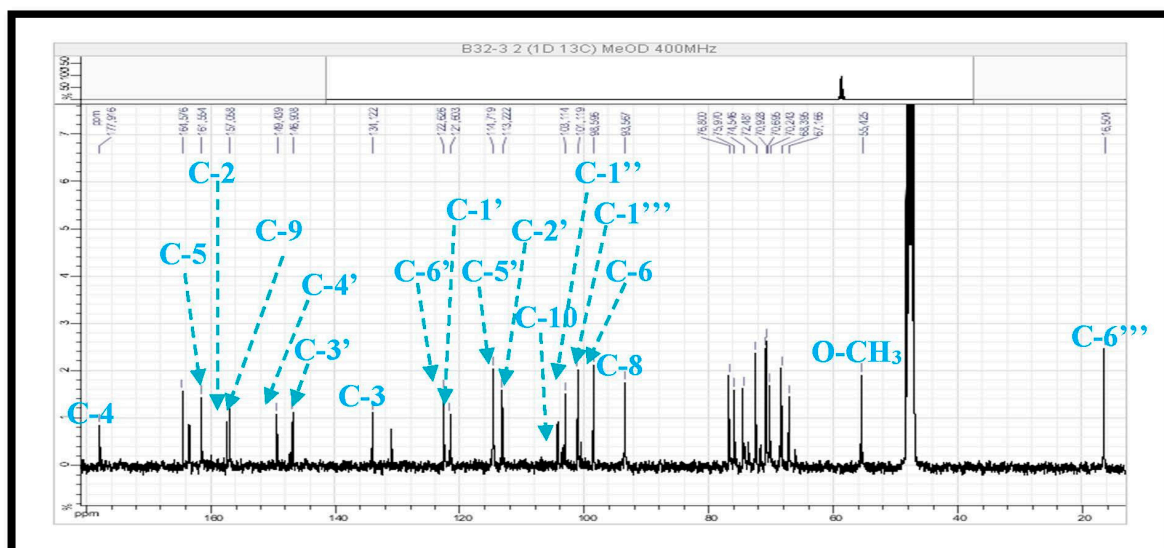

Figure S116. <sup>13</sup>C NMR spectrum (spreading out 3) (100 MHz, CD<sub>3</sub>OD, δppm) of narcissin.

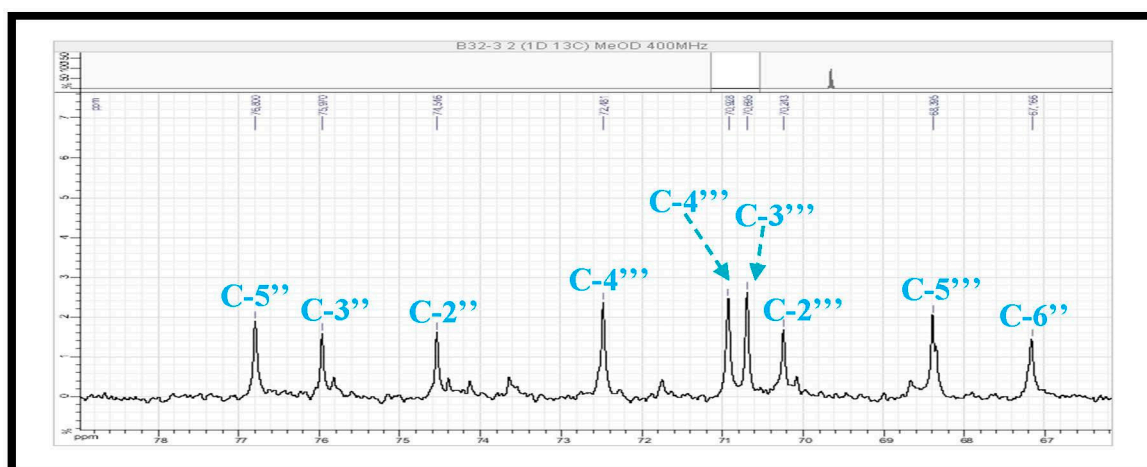

Figure S117. <sup>13</sup>C NMR spectrum (spreading out 4) (100 MHz, CD<sub>3</sub>OD, δppm) of narcissin.
